# Supplementary material for: A novel ECG analog 4-(S)-(2,4,6-trimethylthiobenzyl)-epigallocatechin gallate selectively induces apoptosis of B16-F10 melanoma via activation of autophagy and ROS
Source: PubMed Central journal article supplement (PMC5301500; doi:10.1038/srep42194), 2017-02-10
Supplement: srep42194-s3.pdf [file srep42194-s3.pdf]

**A novel ECG analog 4-(S)-(2,4,6-trimethylthiobenzyl)-epigallocatechin gallate selectively induces apoptosis of B16-F10 melanoma via activation of autophagy and ROS**

Jing Xie<sup>1,3,\*</sup>, Ju-ping Yun<sup>1,\*</sup>, Ya-nan Yang<sup>1,\*</sup>, Fang Hua<sup>1</sup>, Xiao-wei Zhang<sup>1</sup>, Heng Lin<sup>1</sup>,  
Xiao-xi Lv<sup>1</sup>, Ke Li<sup>2</sup>, Pei-cheng Zhang<sup>1,#</sup> & Zhuo-wei Hu<sup>1,#</sup>

<sup>1</sup> State Key Laboratory of Bioactive Substances and Functions of Natural Medicines, Institute of Materia Medica, Chinese Academy of Medical Sciences and Peking Union Medical College, Beijing 100050, People's Republic of China

<sup>2</sup> Laboratory of Antiviral Research, Institute of Medicinal Biotechnology; Chinese Academy of Medical Sciences & Peking Union Medical College, Beijing 100050, People's Republic of China

<sup>3</sup> Department of Pharmacy, China-Japan Friendship Hospital, Beijing 100050, People's Republic of China

\*These authors contributed equally to this work.

#Correspondence and requests for materials should be addressed to P. C. Z. (email: pczhang@imm.ac.cn) and Z. W. H. (email: huzhuowei@imm.ac.cn)

## **SUPPORTING INFORMATION**

1. <sup>1</sup>H NMR and <sup>13</sup>C NMR spectra of compounds 1-57.
2. The reaction yield of compounds 1-57.
3. Spectra data for 1-57.
4. Supplementary figures S170-177 and legend.
5. Video 1: Representative video of live cells infected with GFP-RFP-LC3 adenoviral without the presence of JP8 (20 μM) for 12 h.
6. Video 2: Representative video of live cells infected with GFP-RFP-LC3 adenoviral in the presence of JP8 (20 μM) for 12 h.

# 1. $^1\text{H}$ NMR and $^{13}\text{C}$ NMR spectra of compounds 1-57

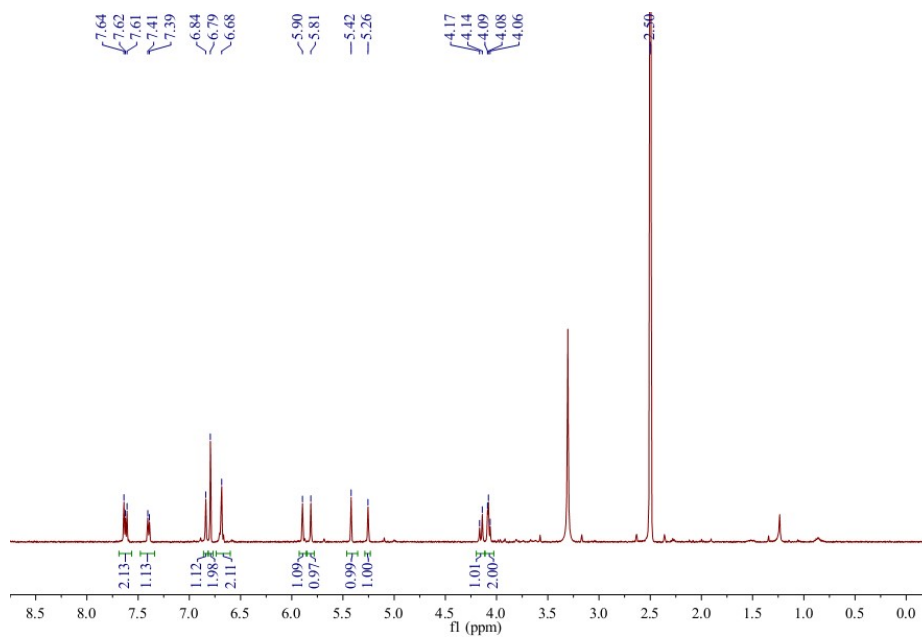

Figure S1.  $^1\text{H}$  NMR of compound **JP-1** (DMSO- $d_6$ )

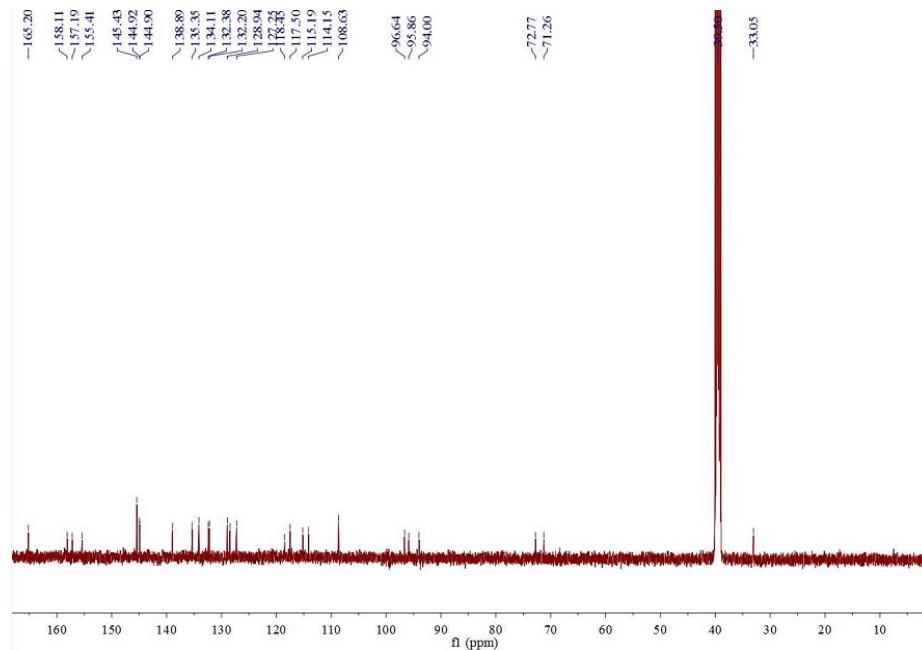

Figure S2.  $^{13}\text{C}$  NMR of compound **JP-1** (DMSO- $d_6$ )

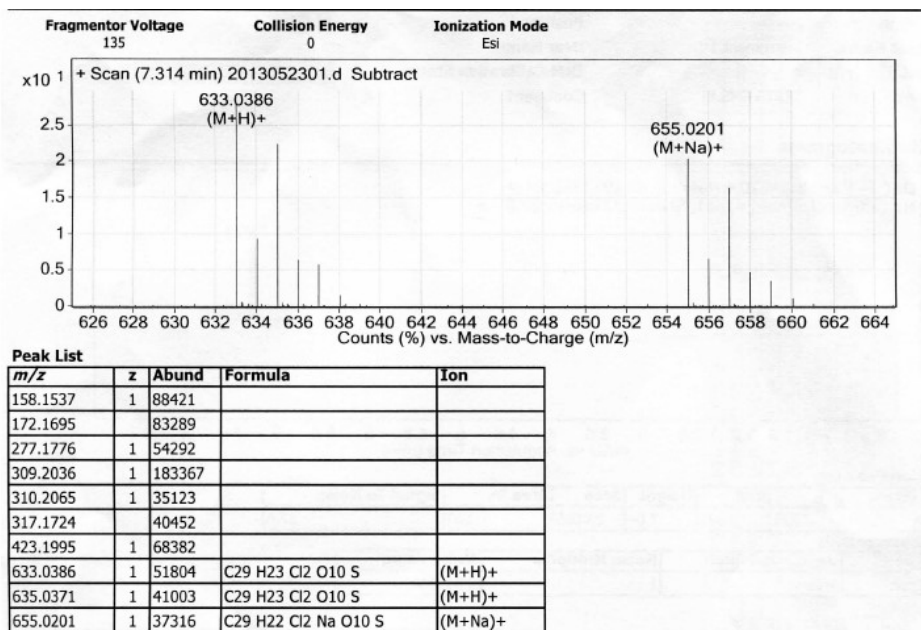

Figure S3. HRESIMS of compound **JP-1**

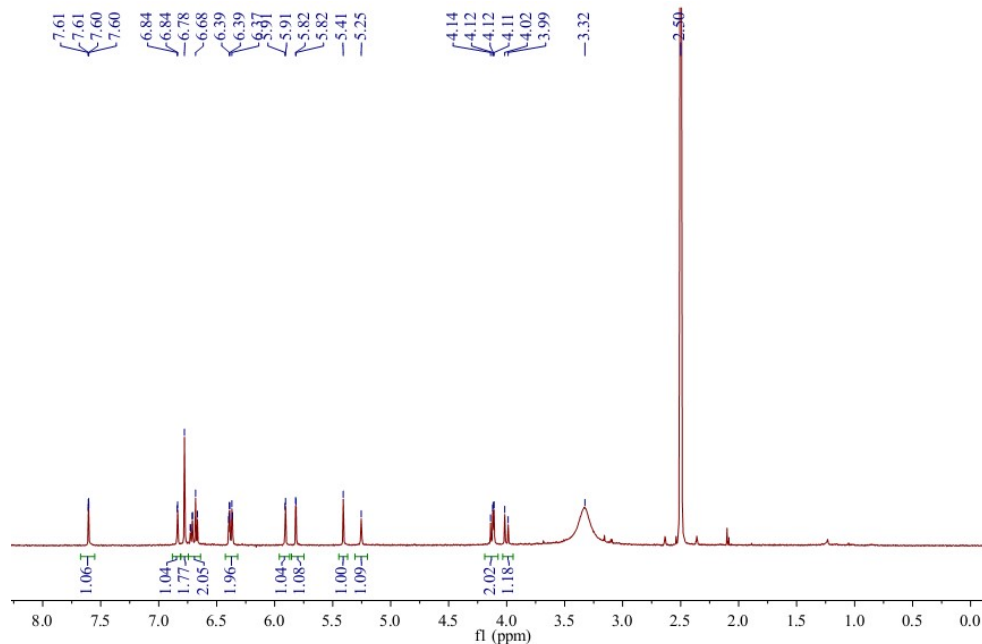

Figure S4. <sup>1</sup>H NMR of compound **JP-2** (DMSO-*d*<sub>6</sub>)

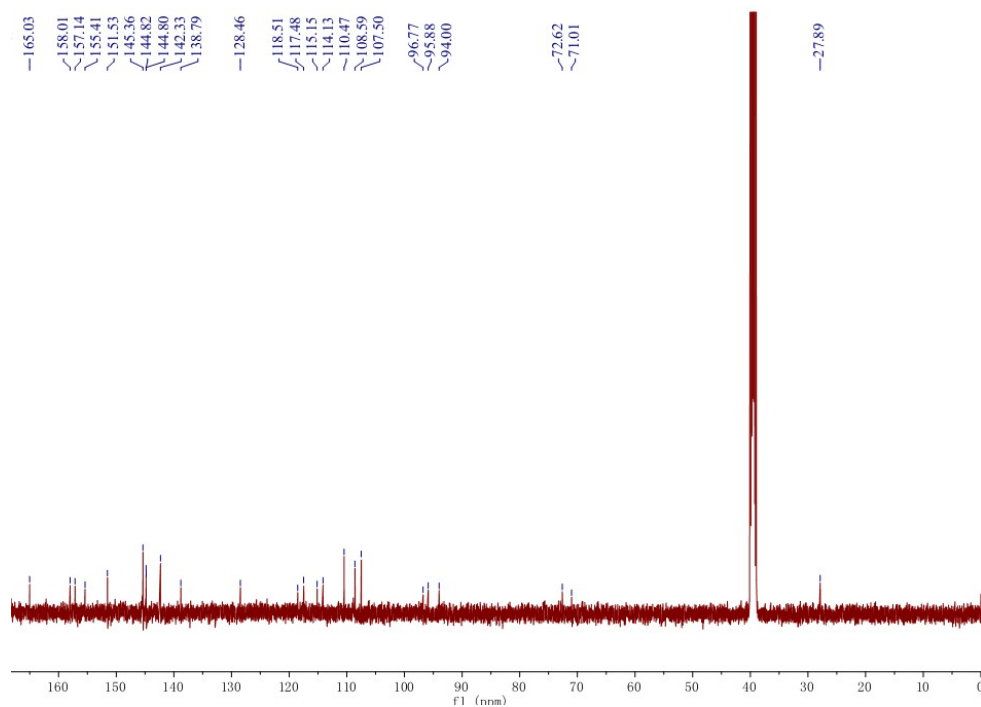

Figure S5.  $^{13}\text{C}$  NMR of compound **JP-2** ( $\text{DMSO-}d_6$ )

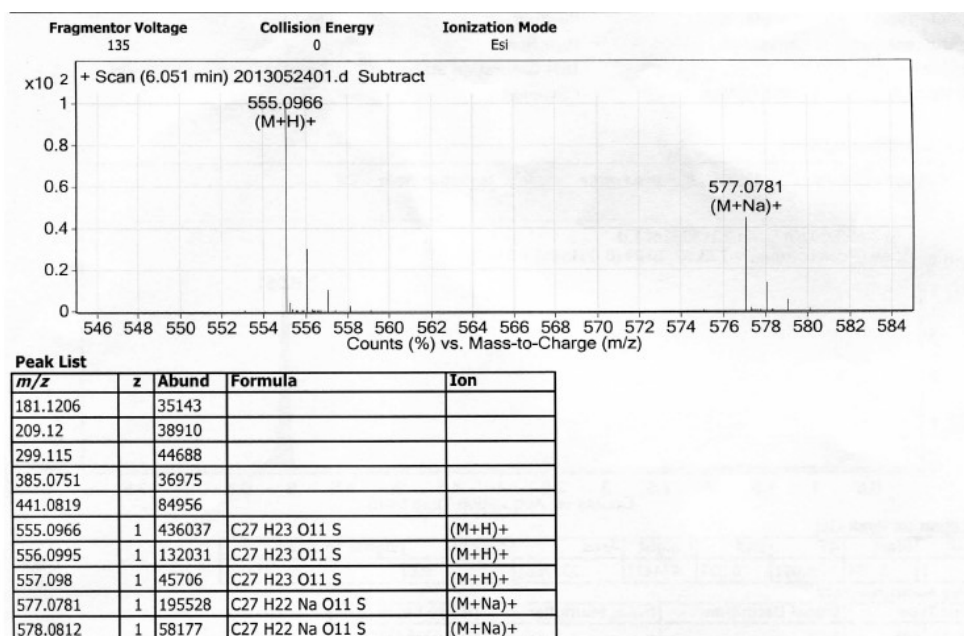

Figure S6. HRESIMS of compound **JP-2**

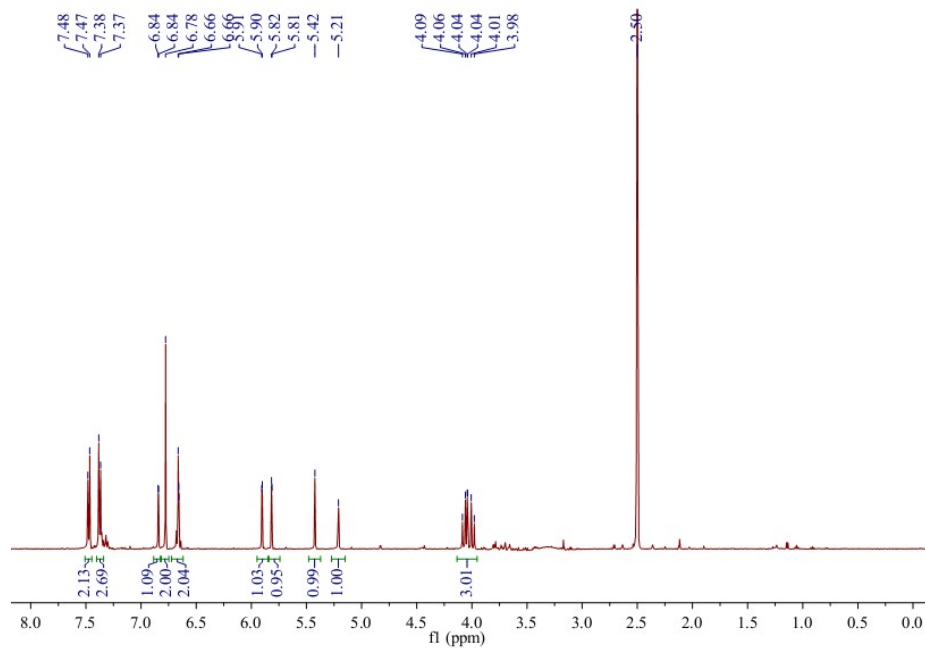

Figure S7.  $^1\text{H}$  NMR of compound **JP-3** ( $\text{DMSO-}d_6$ )

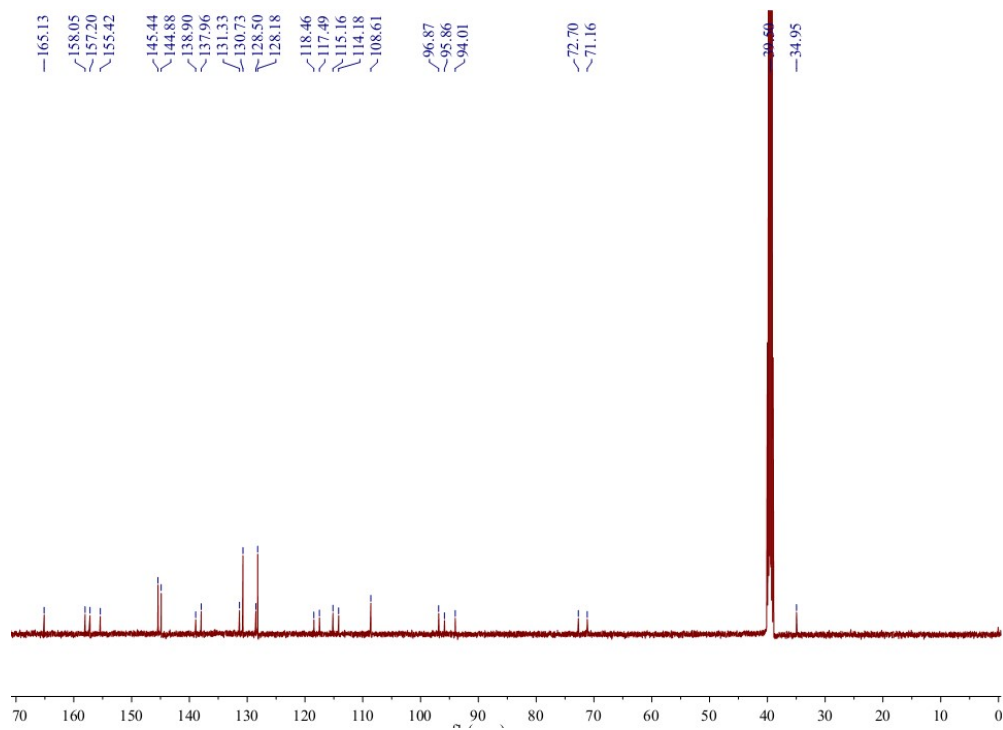

Figure S8.  $^{13}\text{C}$  NMR of compound **JP-3** ( $\text{DMSO-}d_6$ )

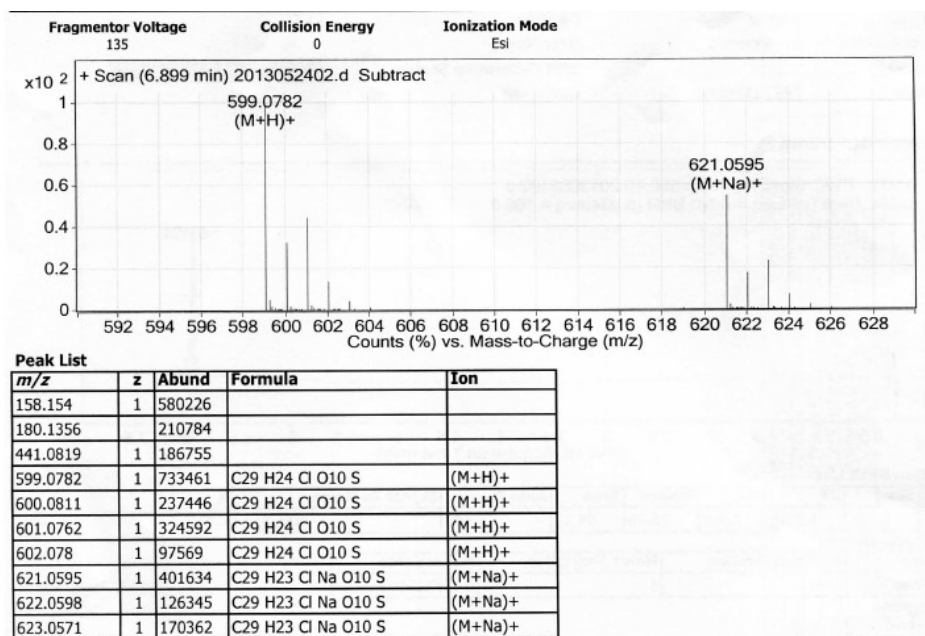

Figure S9. HRESIMS of compound **JP-3** (DMSO-*d*<sub>6</sub>)

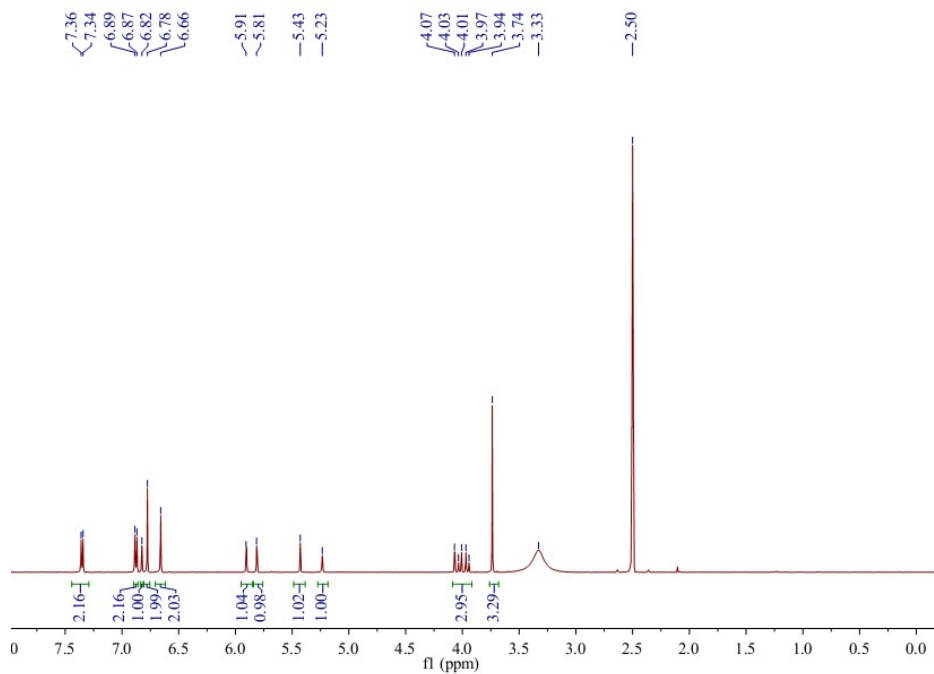

Figure S10. <sup>1</sup>H NMR of compound **JP-4** (DMSO-*d*<sub>6</sub>)

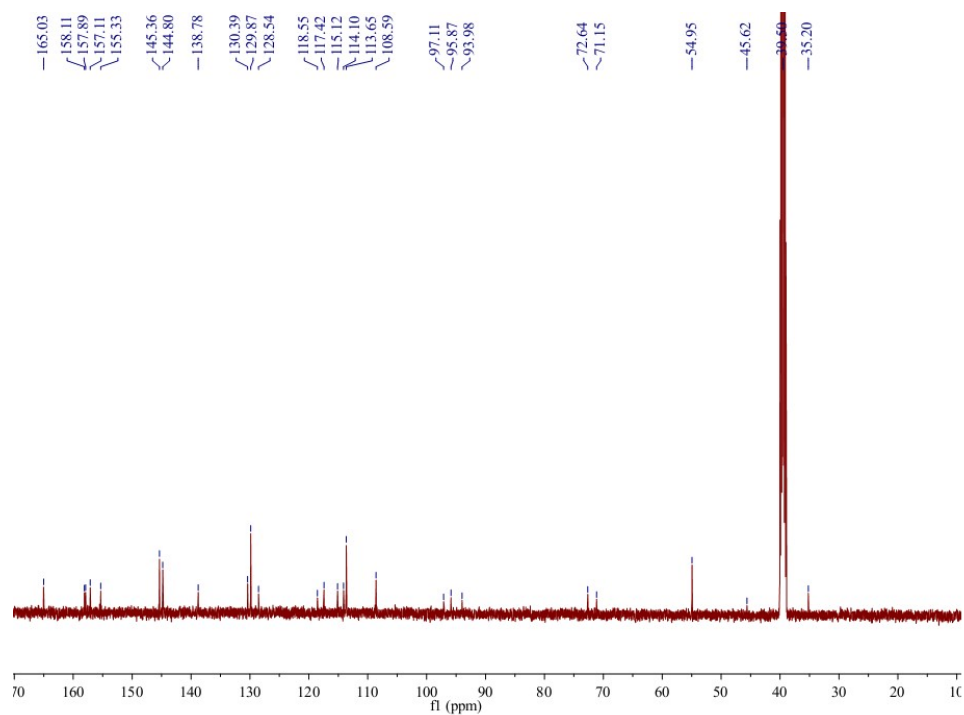

Figure S11.  $^{13}\text{C}$  NMR of compound **JP-4** ( $\text{DMSO-}d_6$ )

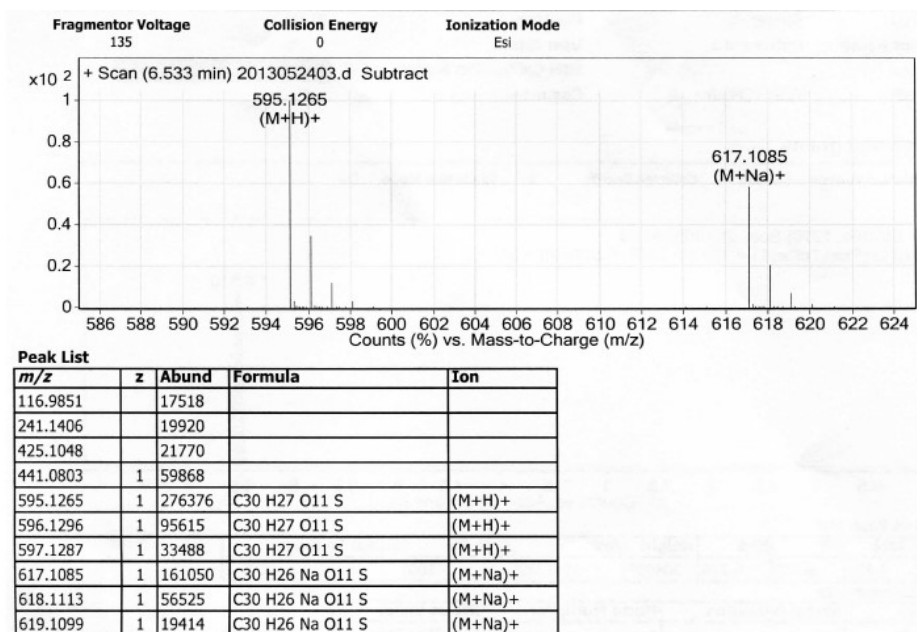

Figure S12. HRESIMS of compound **JP-4**

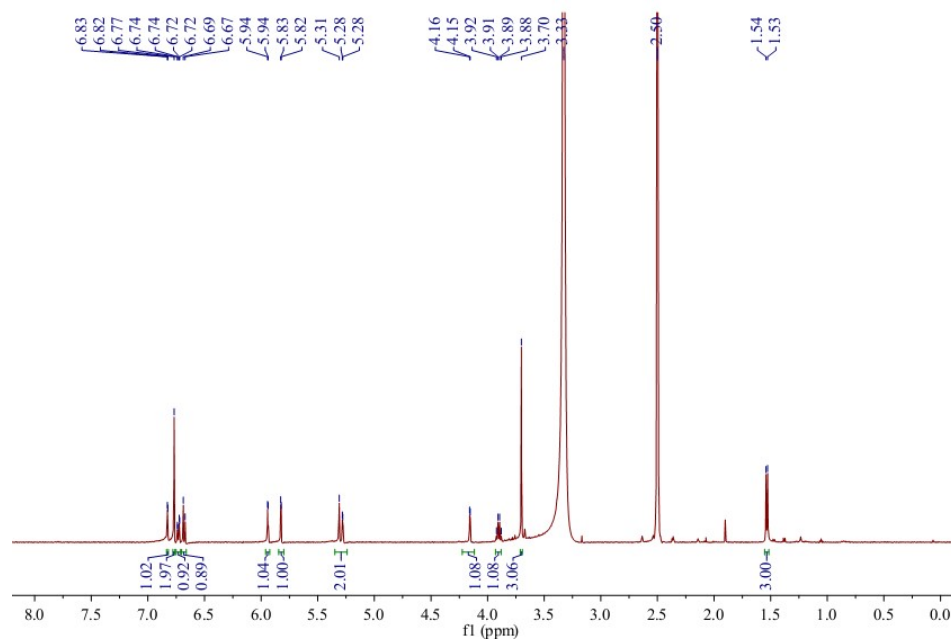

Figure S13.  $^1\text{H}$  NMR of compound **JP-5** ( $\text{DMSO-}d_6$ )

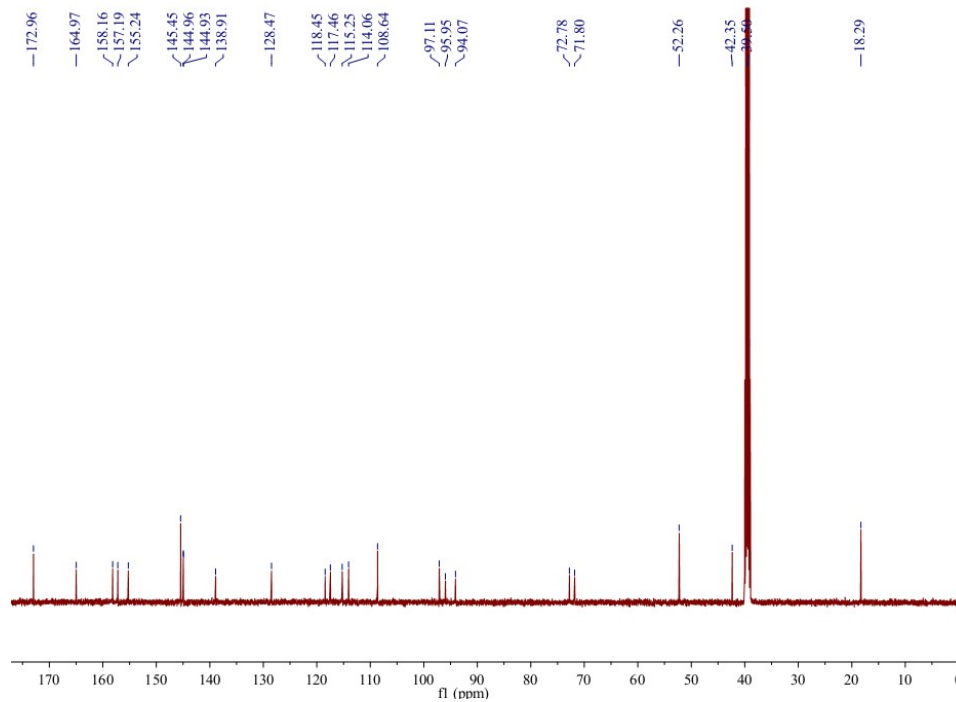

Figure S14.  $^{13}\text{C}$  NMR of compound **JP-5** ( $\text{DMSO-}d_6$ )



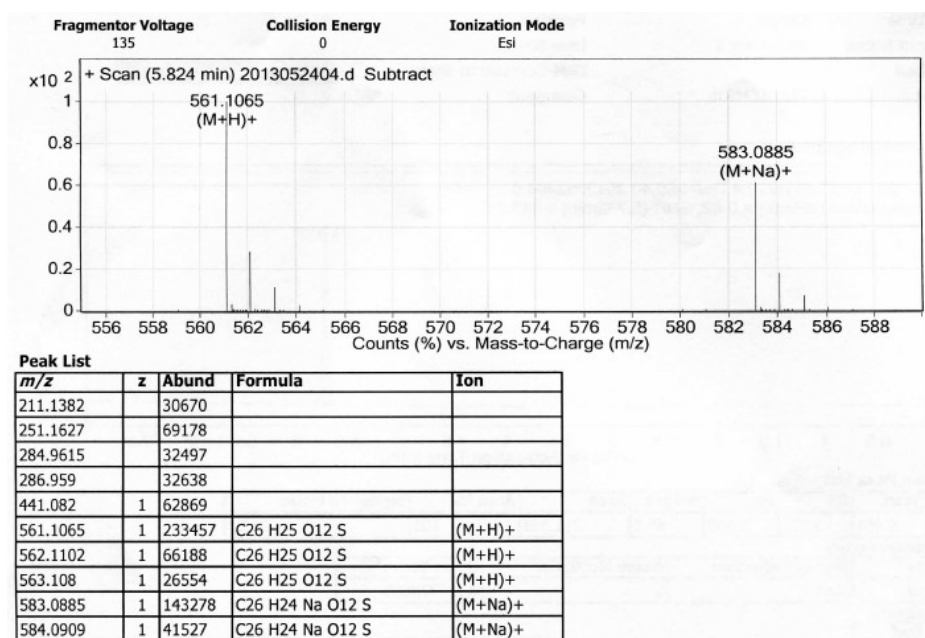

Figure S15. HRESIMS of compound **JP-5**

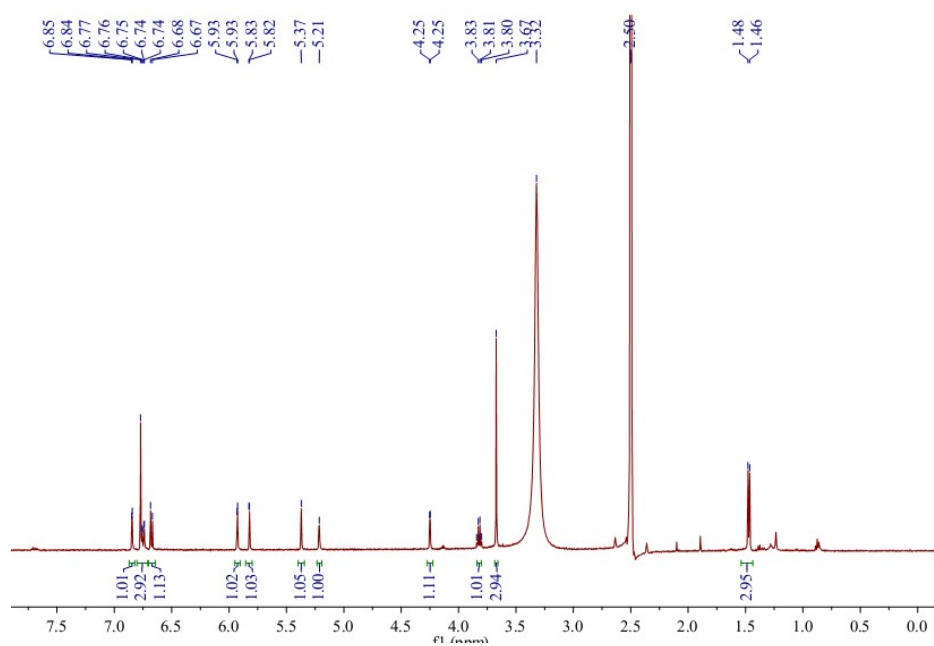

Figure S16.  $^1\text{H}$  NMR of compound **JP-6** ( $\text{DMSO-}d_6$ )

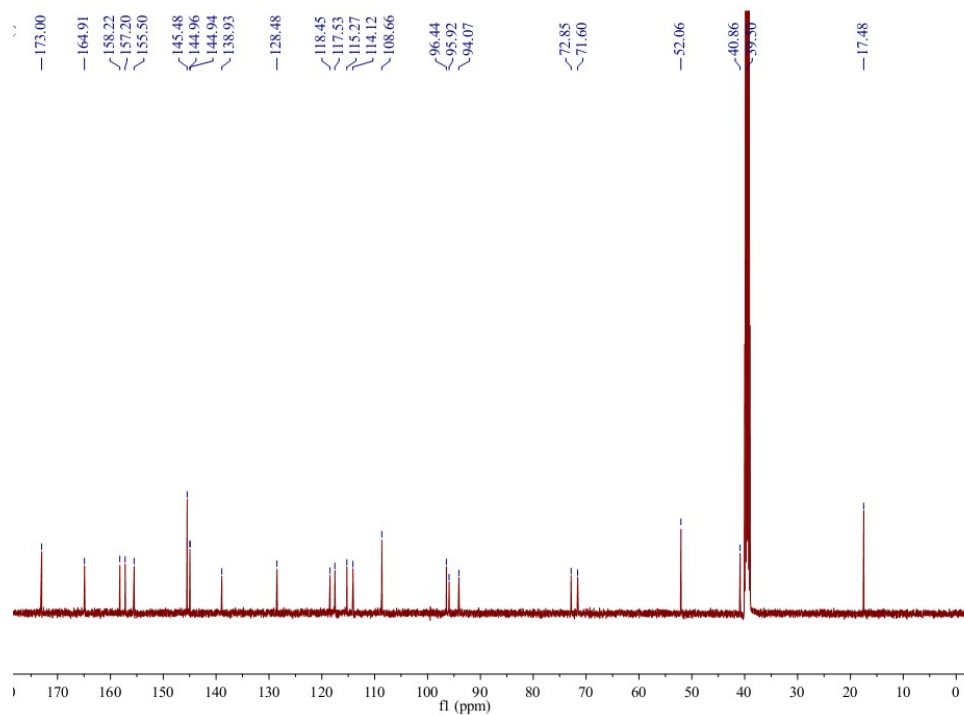

Figure S17.  $^{13}\text{C}$  NMR of compound **JP-6** ( $\text{DMSO-}d_6$ )

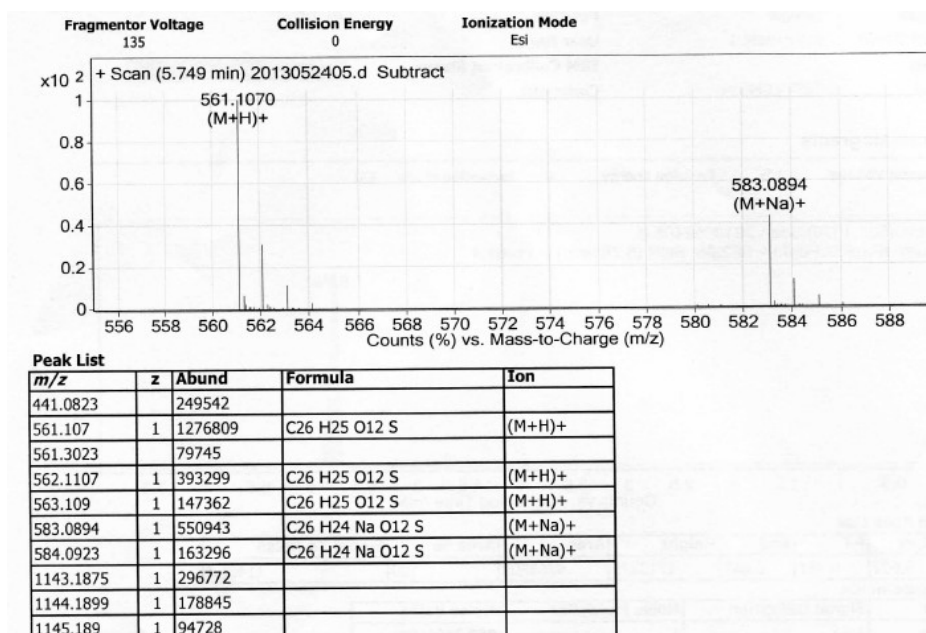

Figure S18. HRESIMS of compound **JP-6**

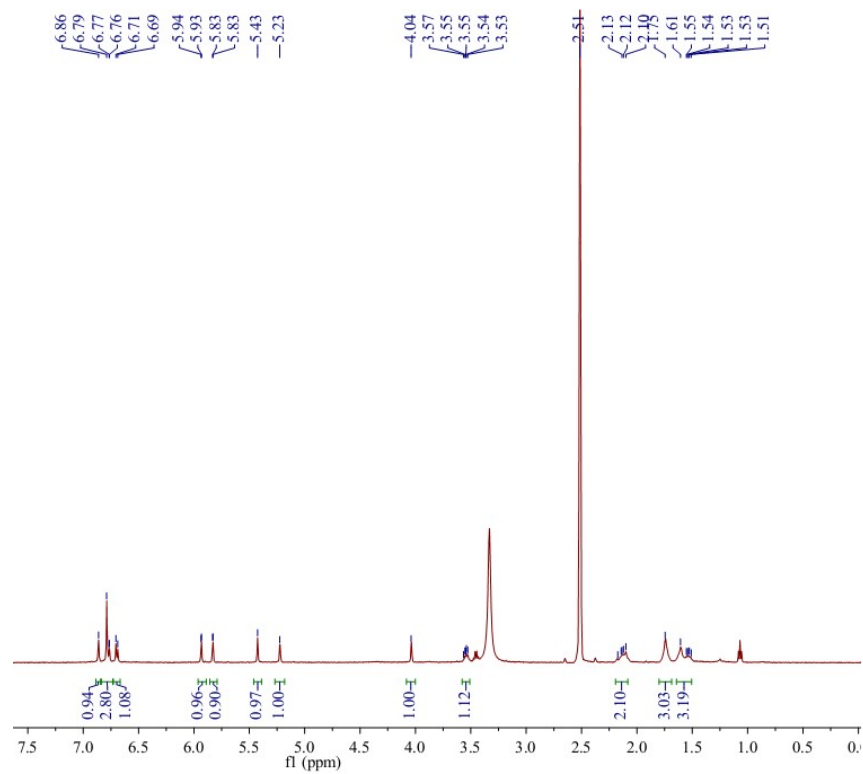

Figure S19.  $^1\text{H}$  NMR of compound **JP-7** ( $\text{DMSO-}d_6$ )

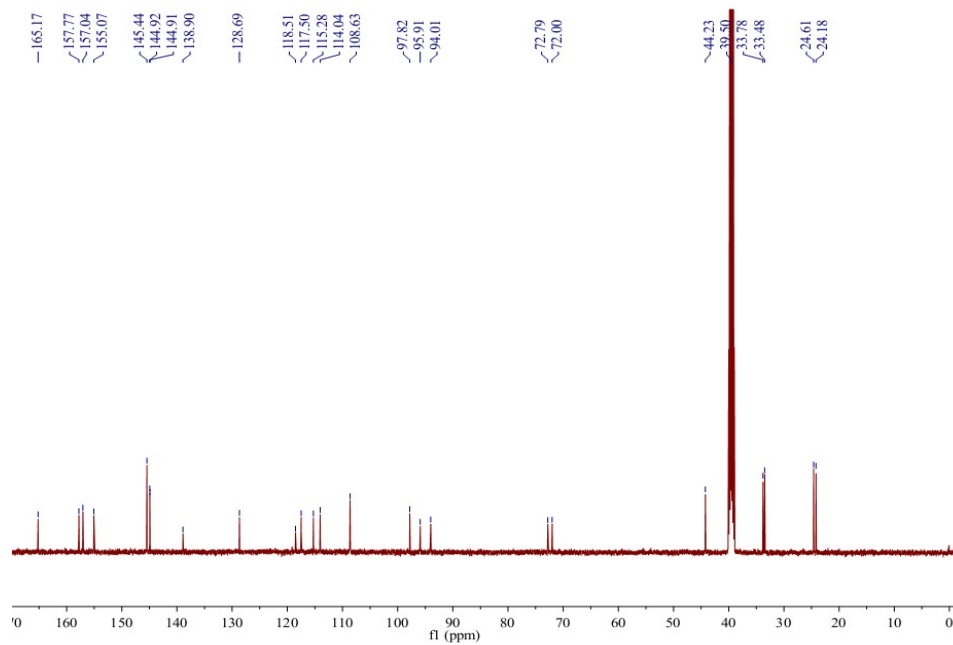

Figure S20.  $^{13}\text{C}$  NMR of compound **JP-7** ( $\text{DMSO-}d_6$ )

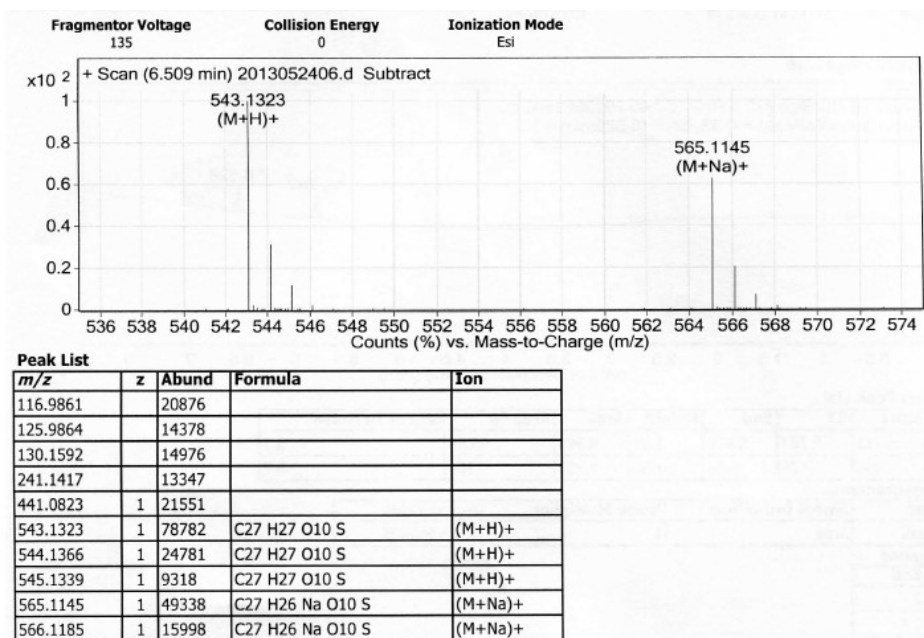

Figure S21. HRESIMS of compound **JP-7**

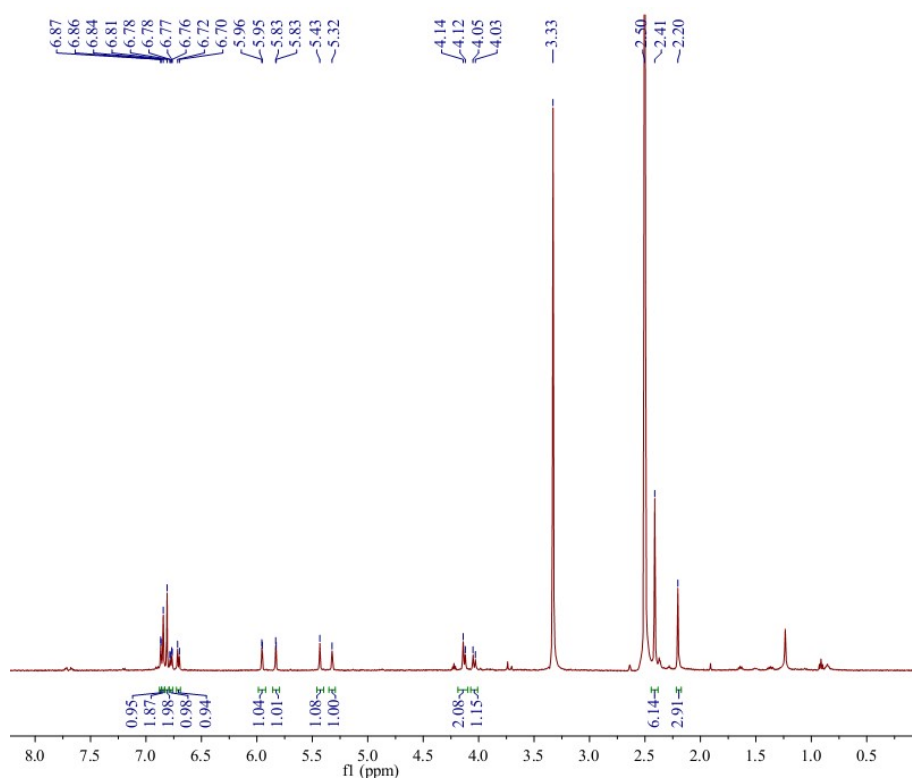

Figure S22.  $^1\text{H}$  NMR of compound **JP-8** ( $\text{DMSO-}d_6$ )

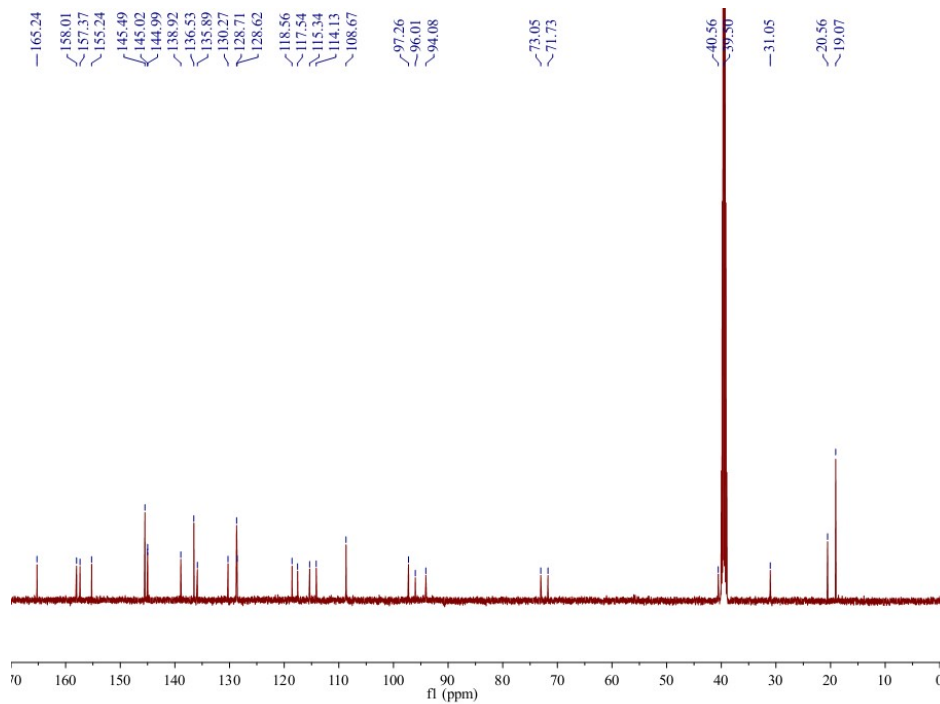

Figure S23.  $^{13}\text{C}$  NMR of compound **JP-8** ( $\text{DMSO-}d_6$ )

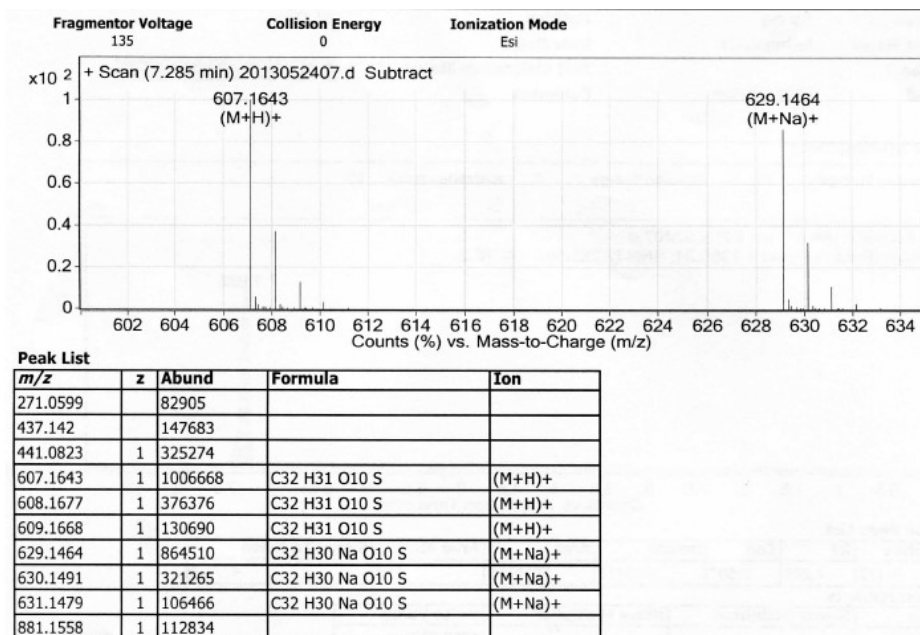

Figure S24. HRMS/MS of compound **JP-8** ( $\text{DMSO-}d_6$ )

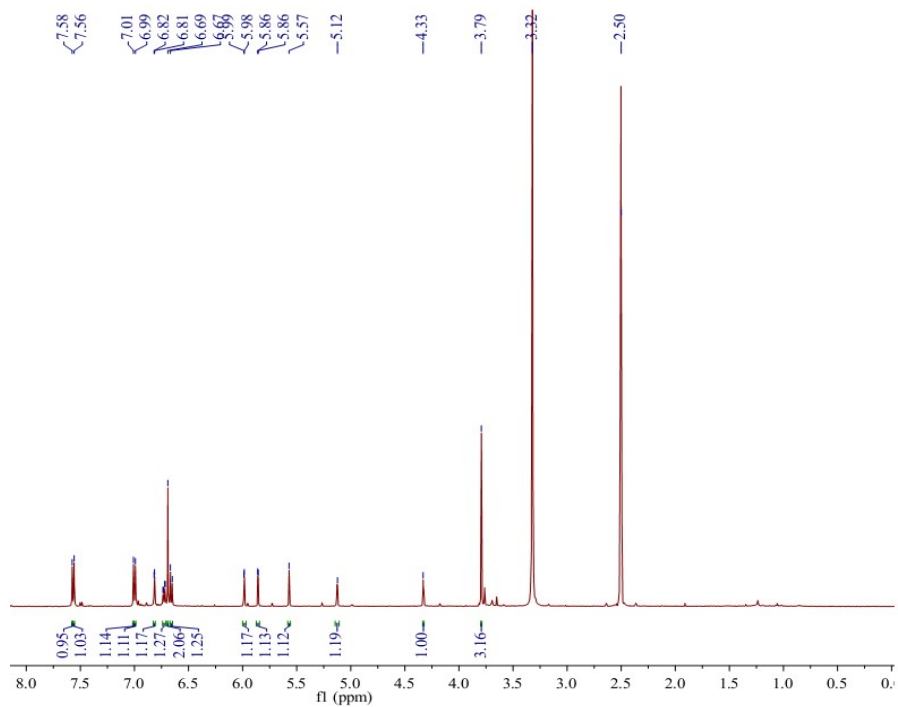

Figure S25.  $^1\text{H}$  NMR of compound **JP-9** ( $\text{DMSO-}d_6$ )

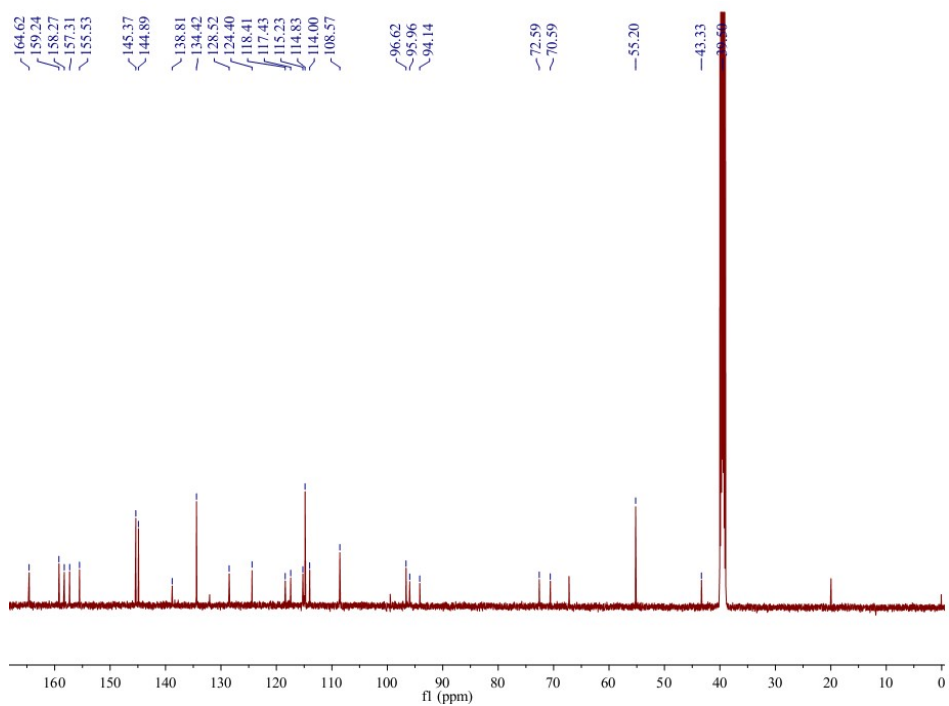

Figure S26.  $^{13}\text{C}$  NMR of compound **JP-9** ( $\text{DMSO-}d_6$ )

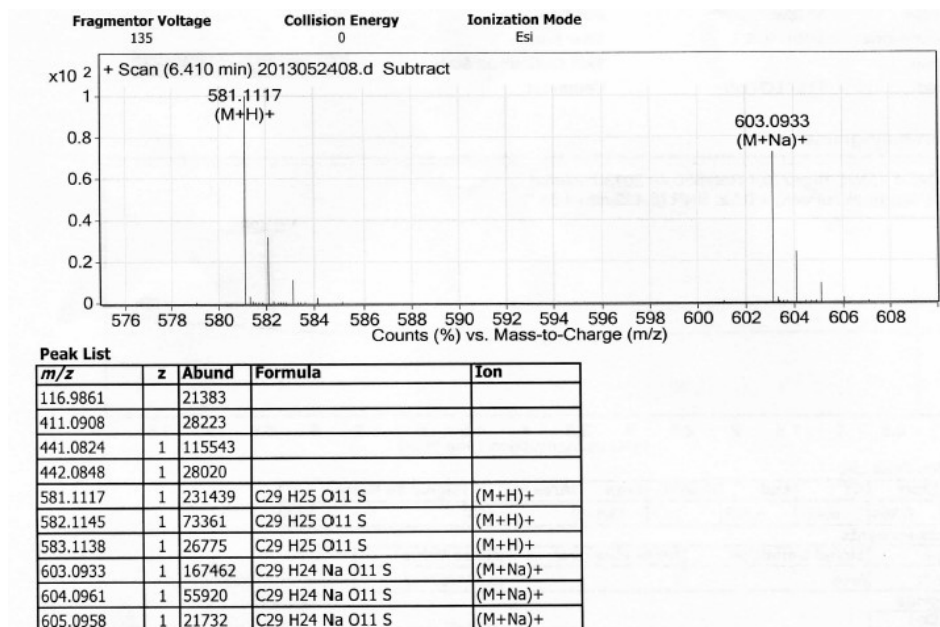

Figure S27. HRESIMS of compound **JP-9**

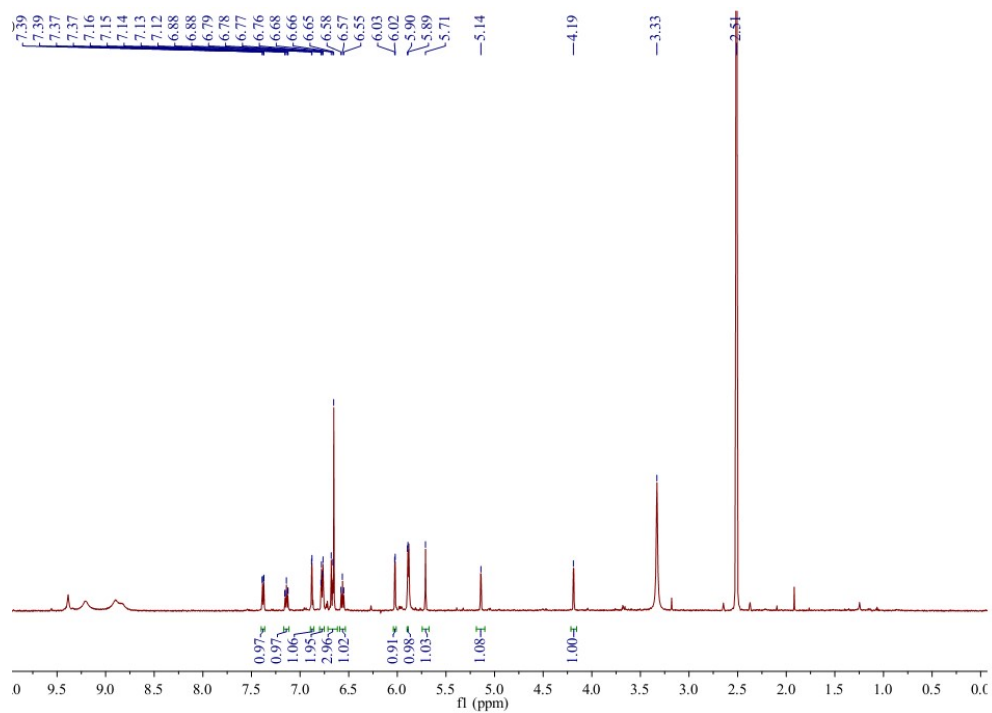

Figure S28. <sup>1</sup>H NMR of compound **JP-10** (DMSO-*d*<sub>6</sub>)

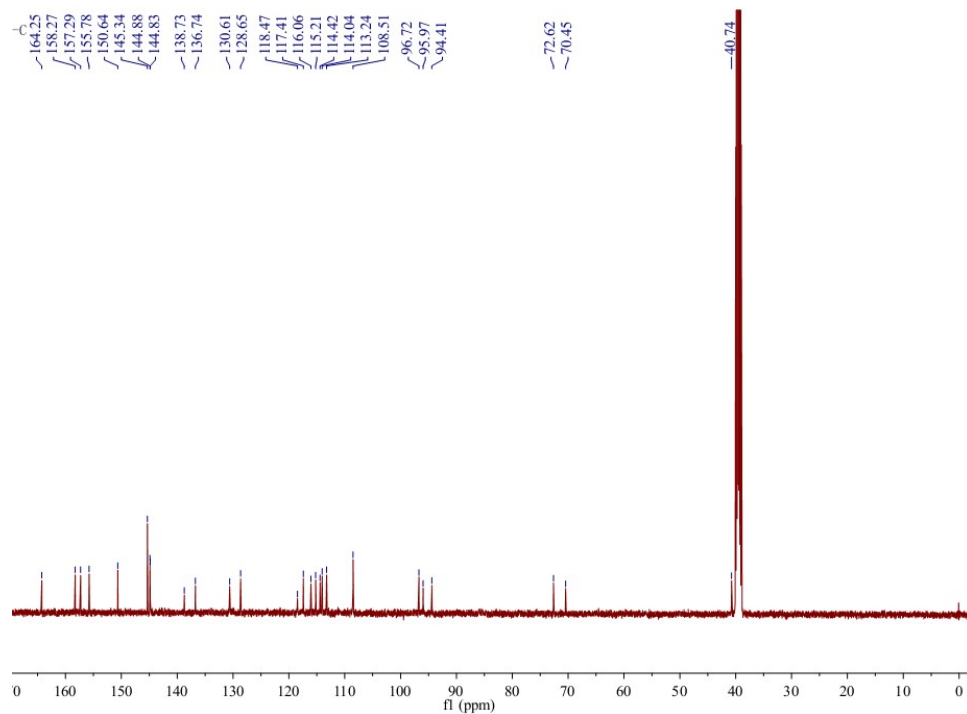

Figure S29.  $^{13}\text{C}$  NMR of compound **JP-10** ( $\text{DMSO-}d_6$ )

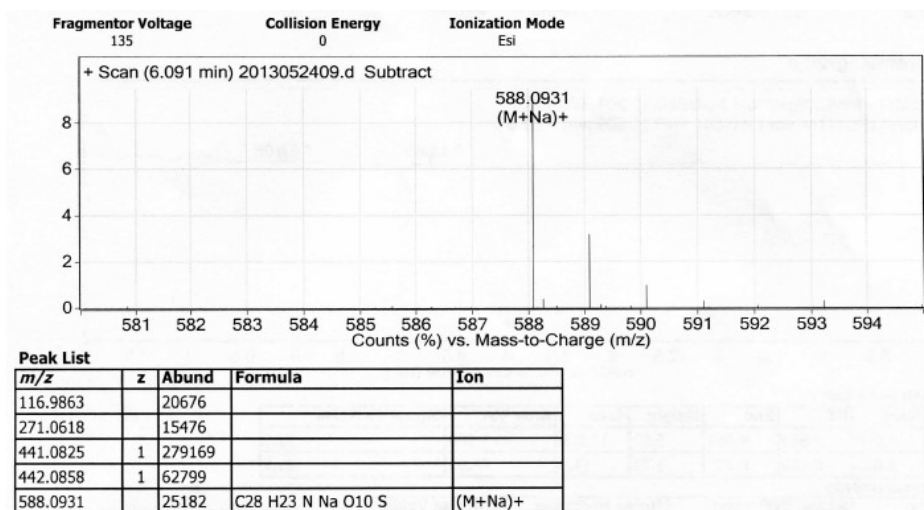

Figure S30. HRESIMS of compound **JP-10**



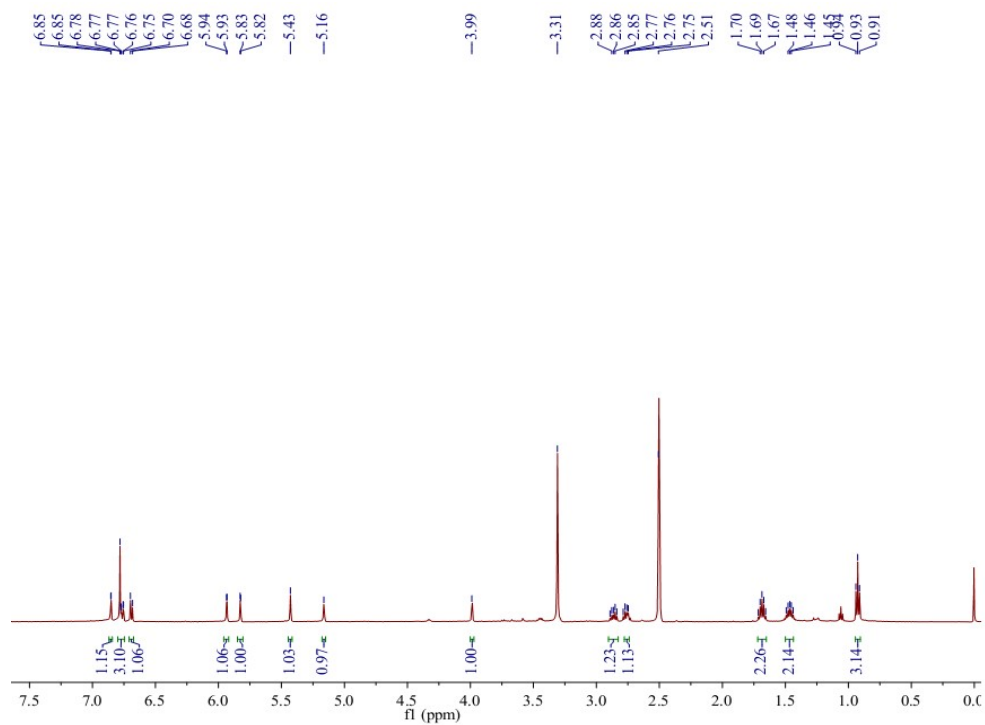

Figure S31.  $^1\text{H}$  NMR of compound **JP-11** ( $\text{DMSO-}d_6$ )

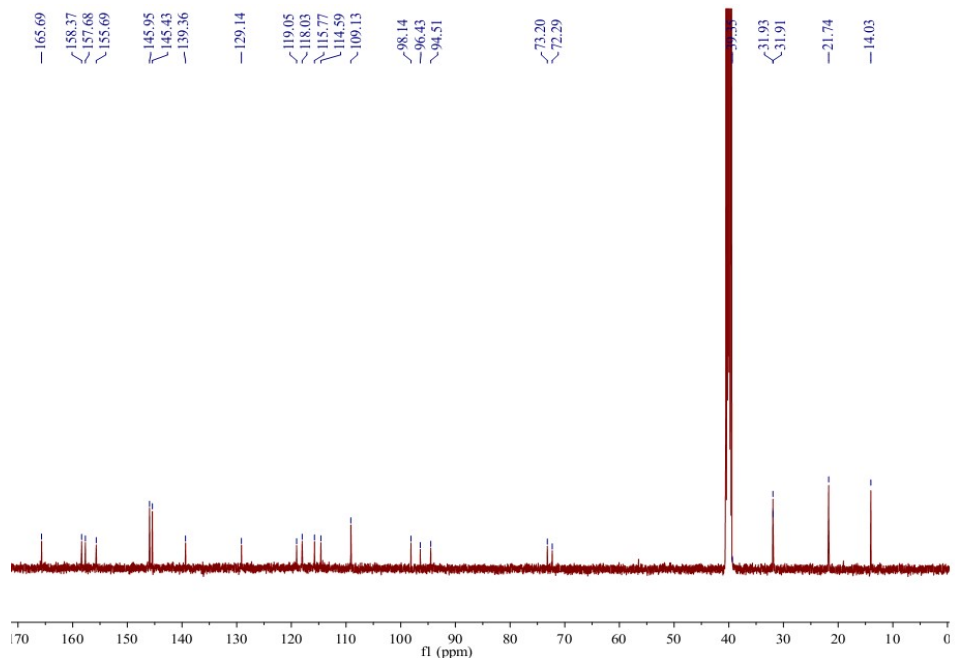

Figure S32.  $^{13}\text{C}$  NMR of compound **JP-11** ( $\text{DMSO-}d_6$ )

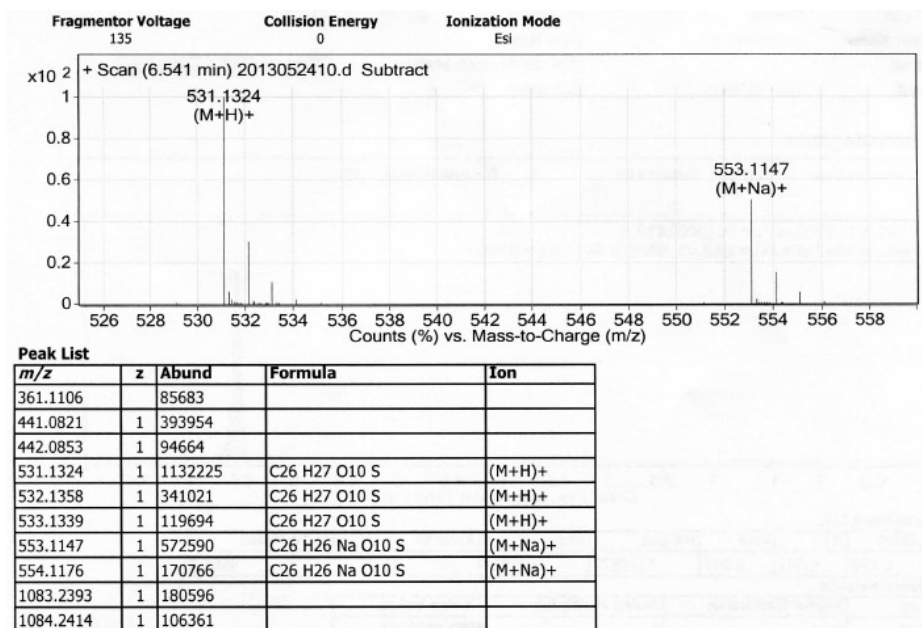

Figure S33. HRESIMS of compound **JP-11**

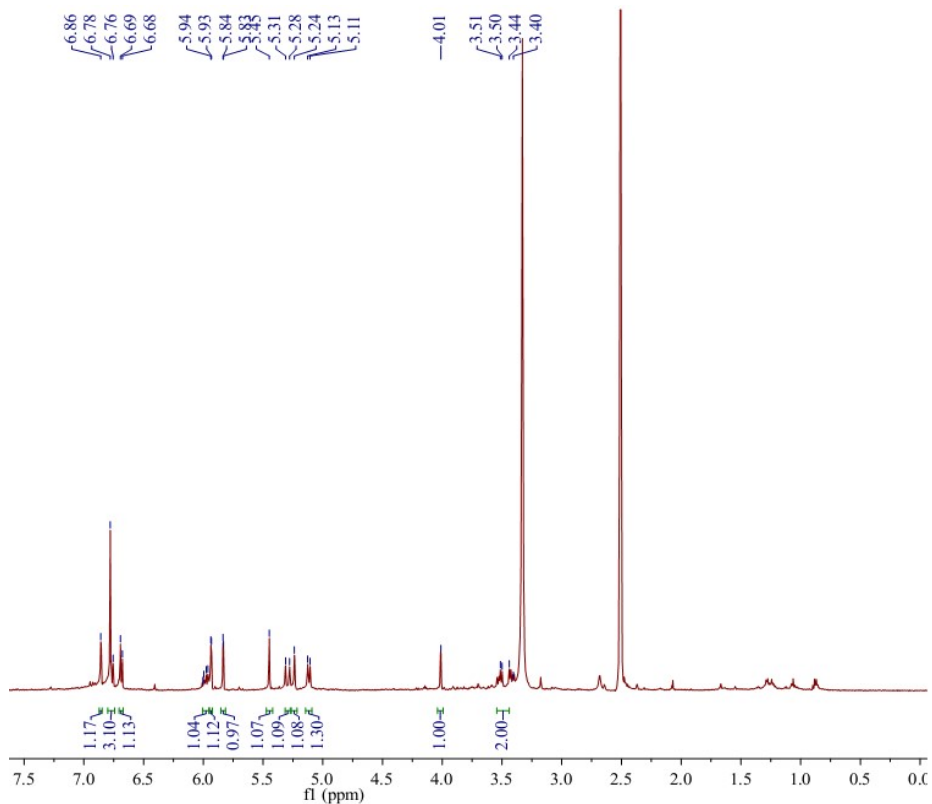

Figure S34. <sup>1</sup>H NMR of compound **JP-12** (DMSO-*d*<sub>6</sub>)

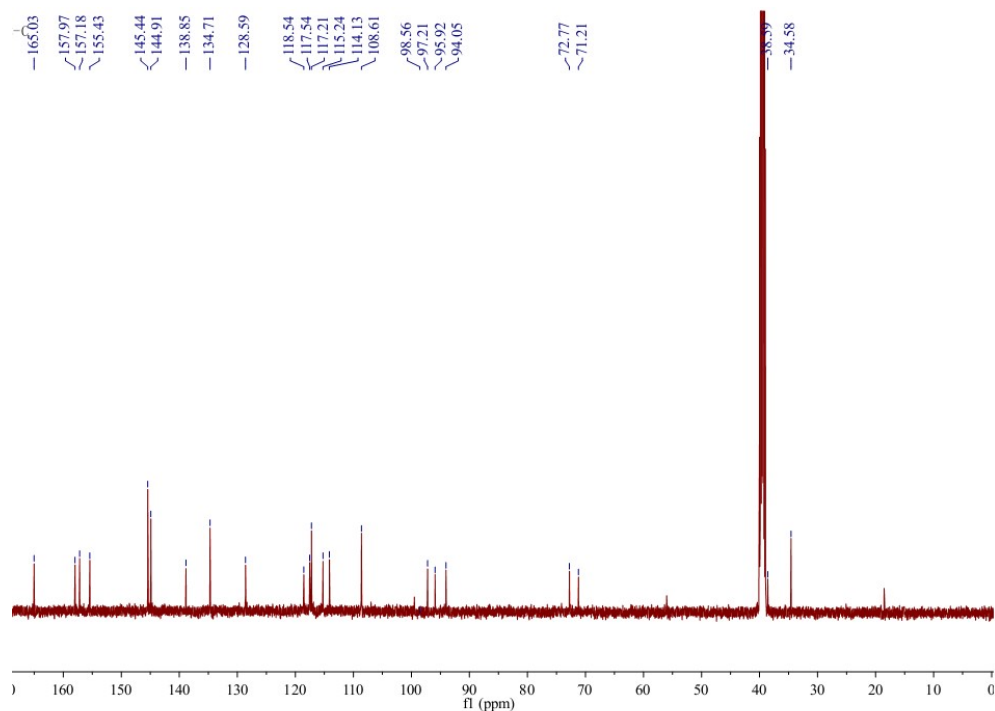

Figure S35.  $^{13}\text{C}$  NMR of compound **JP-12** ( $\text{DMSO-}d_6$ )

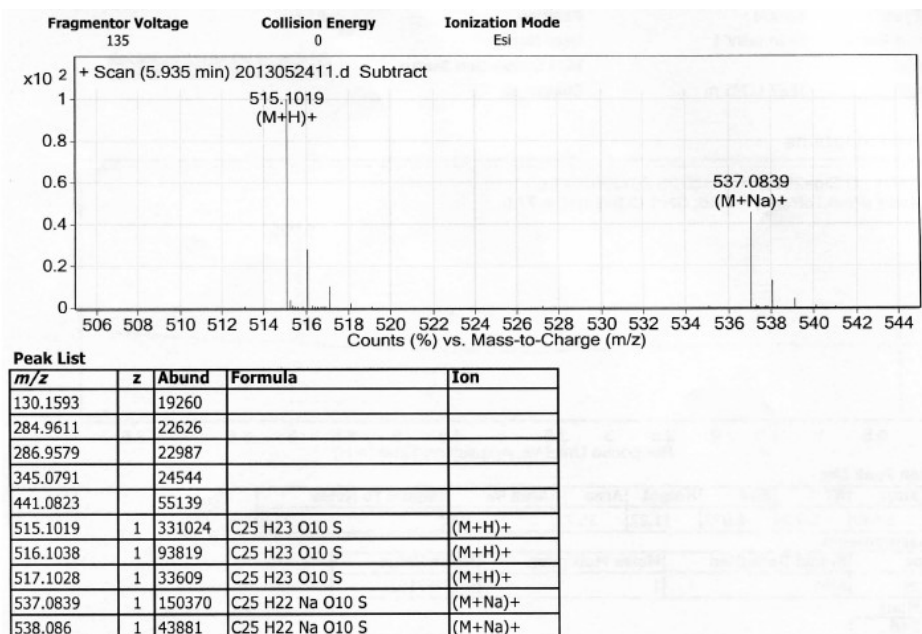

Figure S36. HRESIMS of compound **JP-12**

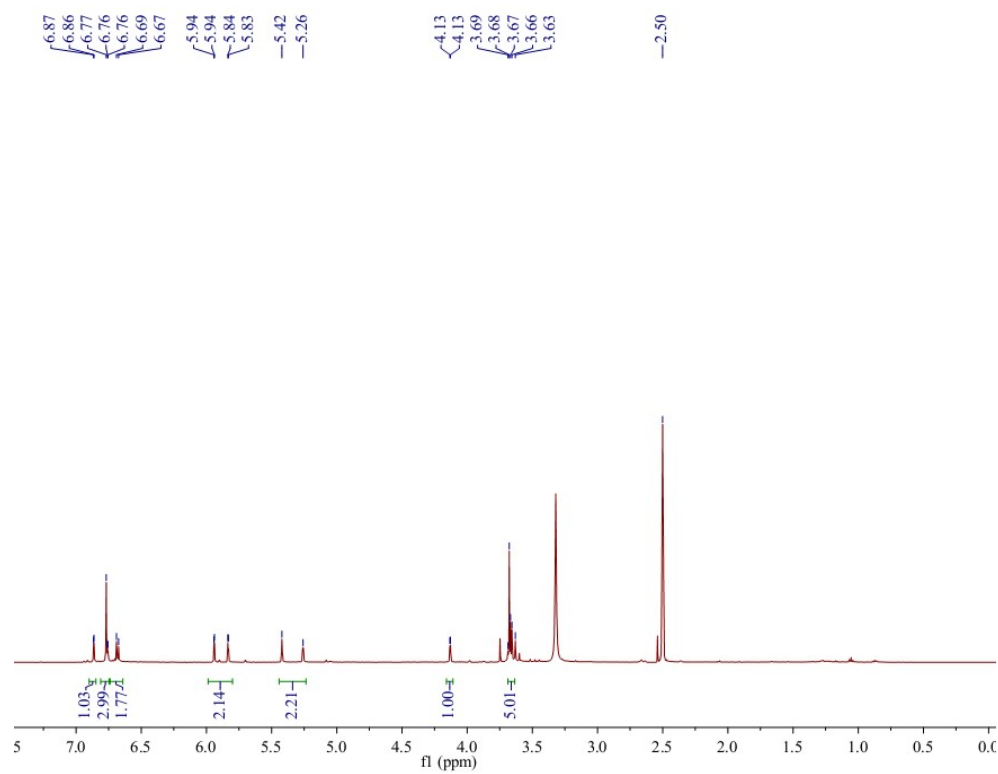

Figure S37.  $^1\text{H}$  NMR of compound **JP-13** ( $\text{DMSO-}d_6$ )

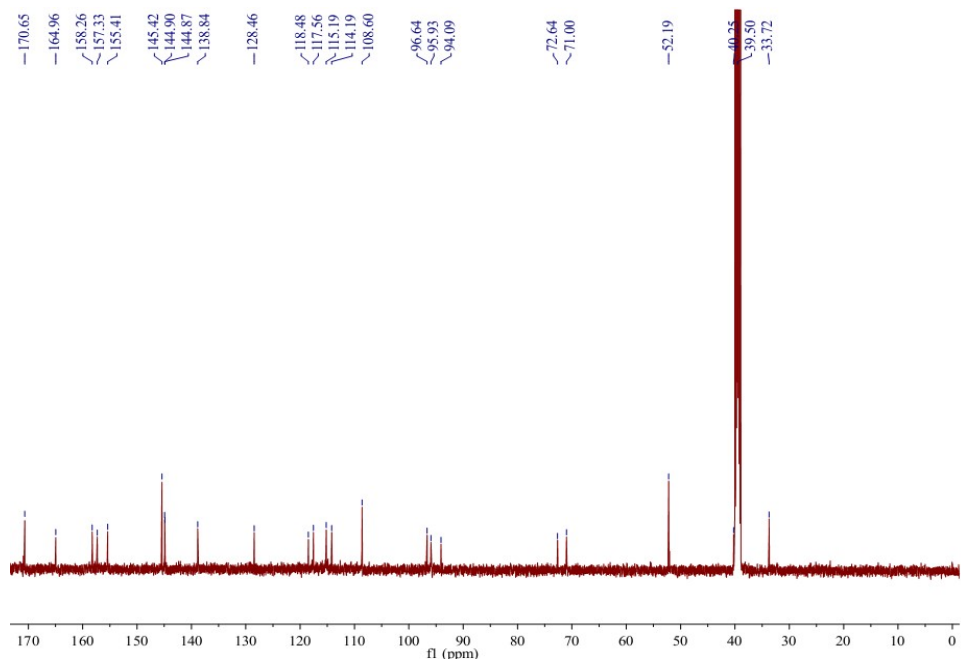

Figure S38.  $^{13}\text{C}$  NMR of compound **JP-13** ( $\text{DMSO-}d_6$ )

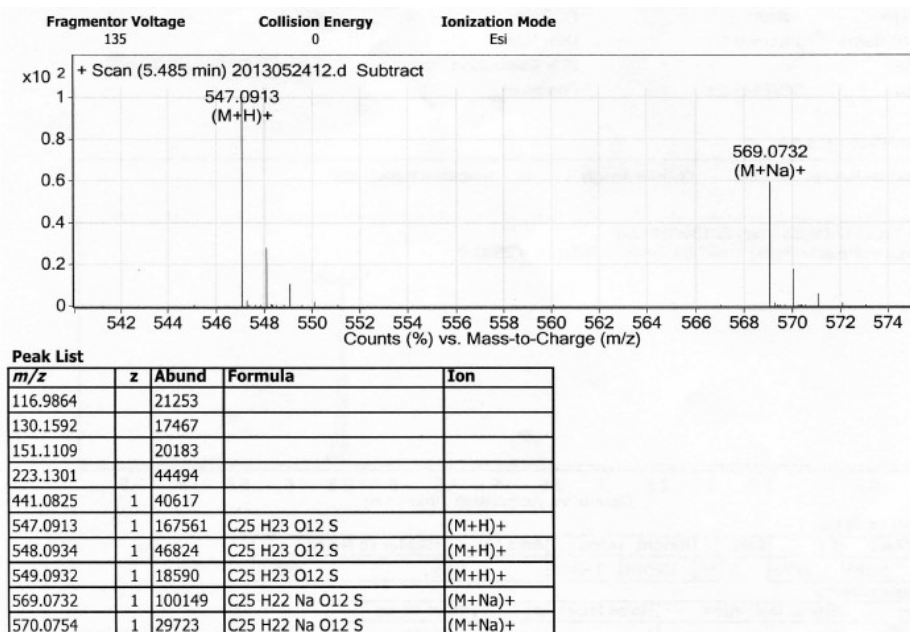

Figure S39. HRESIMS of compound **JP-13**

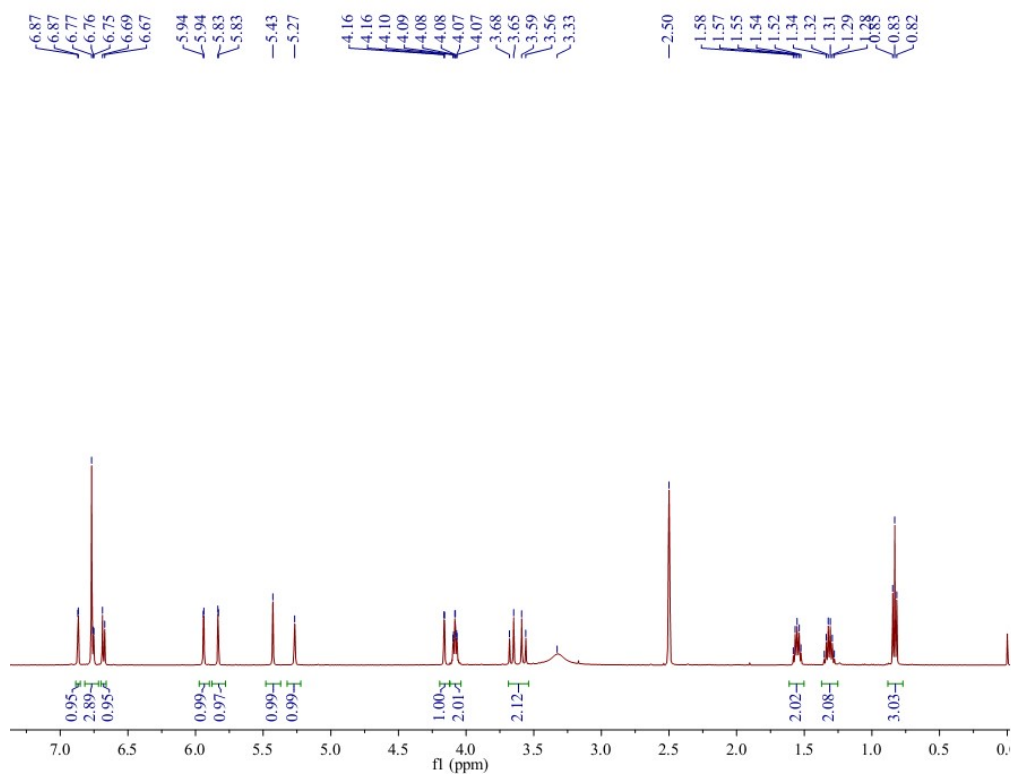

Figure S40. <sup>1</sup>H NMR of compound **JP-14** (DMSO-*d*<sub>6</sub>)

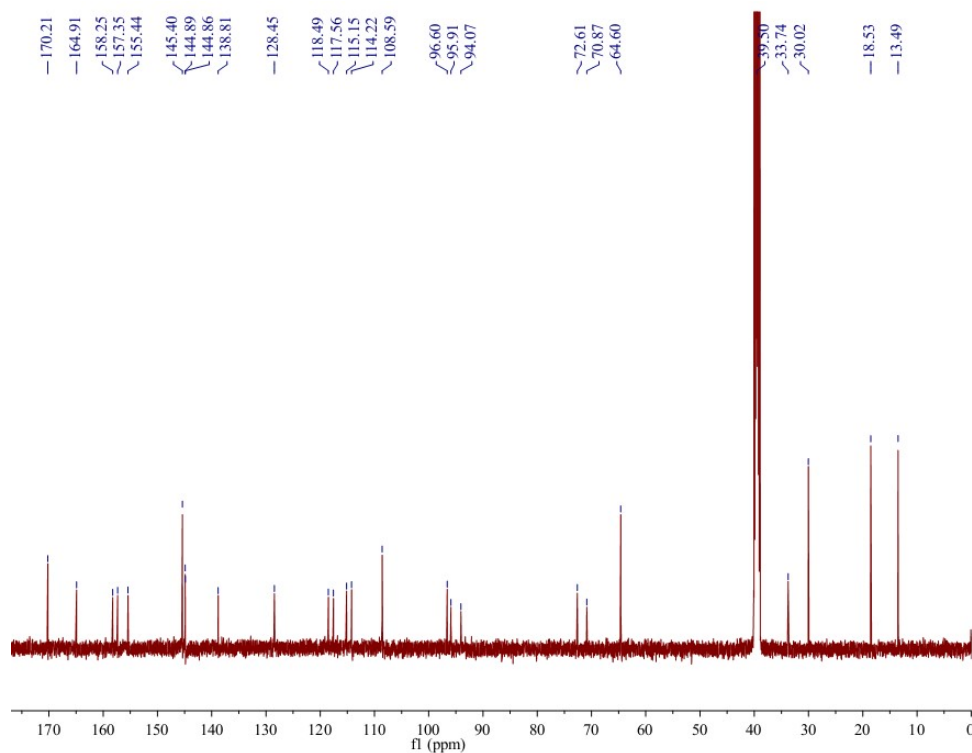

Figure S41.  $^{13}\text{C}$  NMR of compound **JP-14** ( $\text{DMSO-}d_6$ )

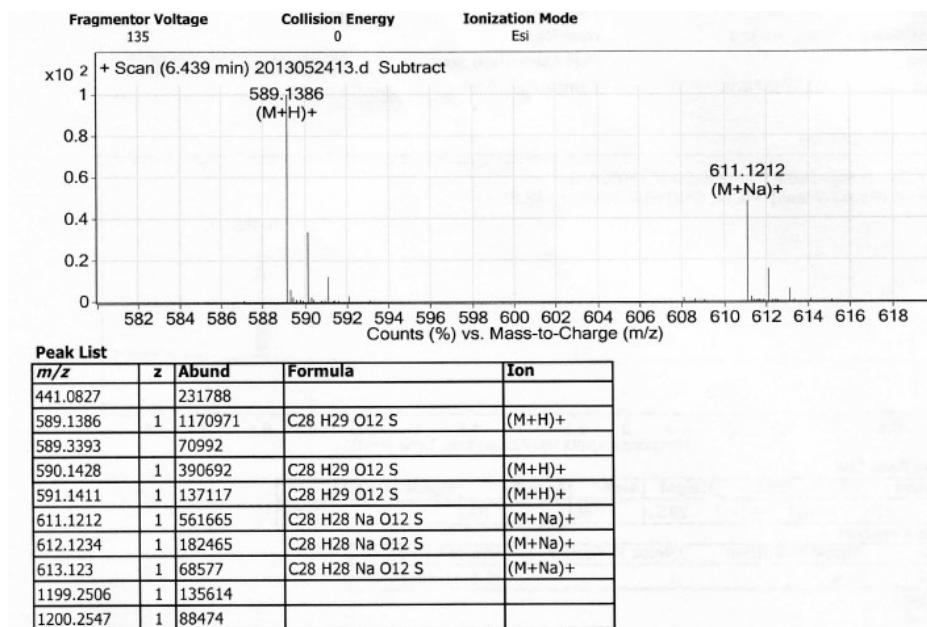

Figure S42. HRESIMD of compound **JP-14**

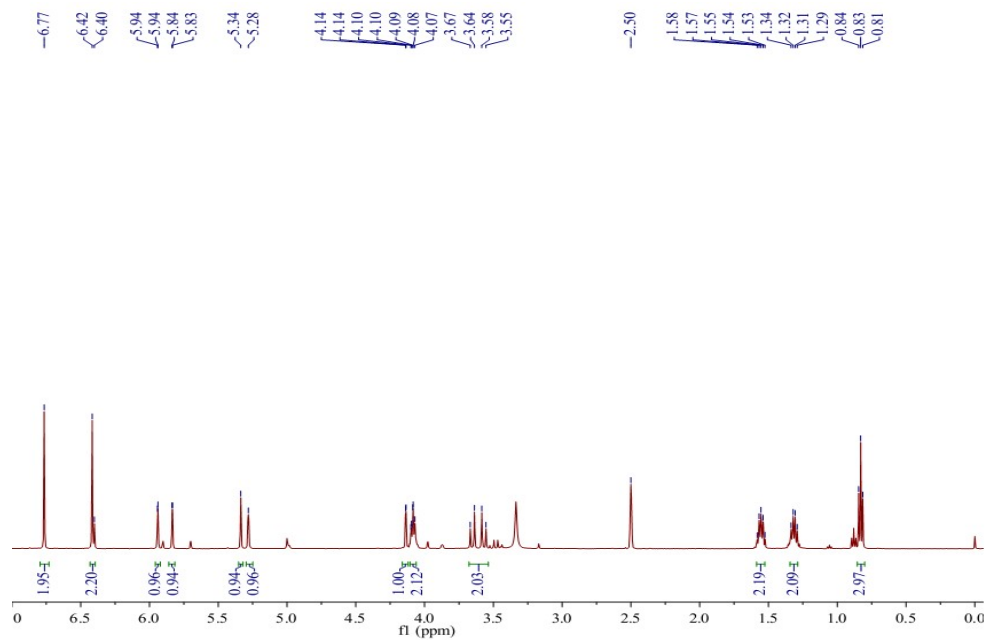

Figure S43.  $^1\text{H}$  NMR of compound **JP-15** ( $\text{DMSO-}d_6$ )

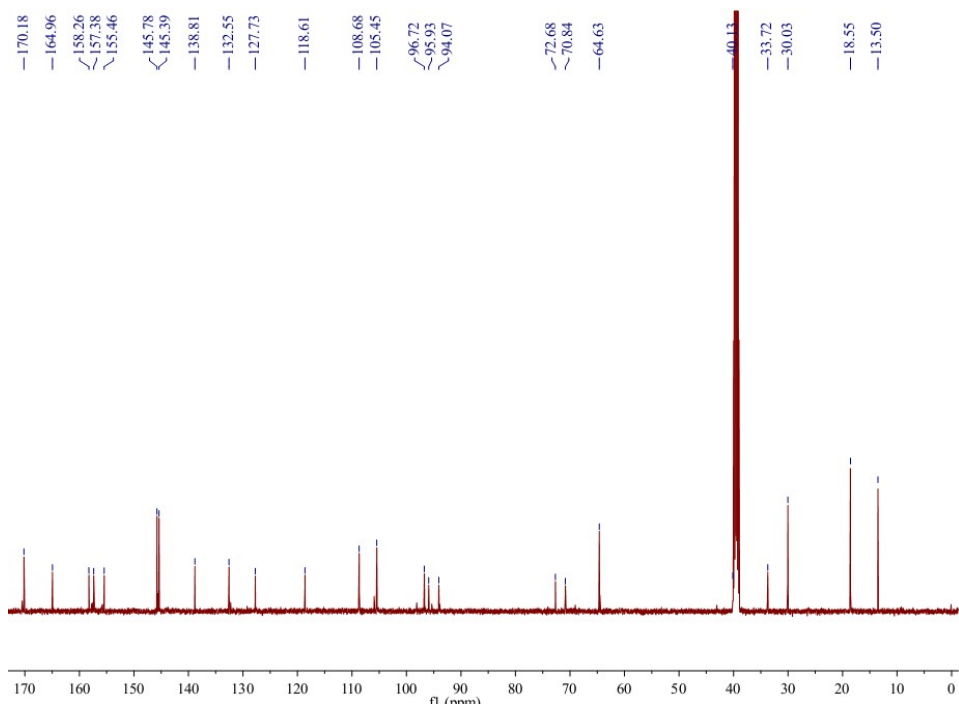

Figure S44.  $^{13}\text{C}$  NMR of compound **JP-15** ( $\text{DMSO-}d_6$ )

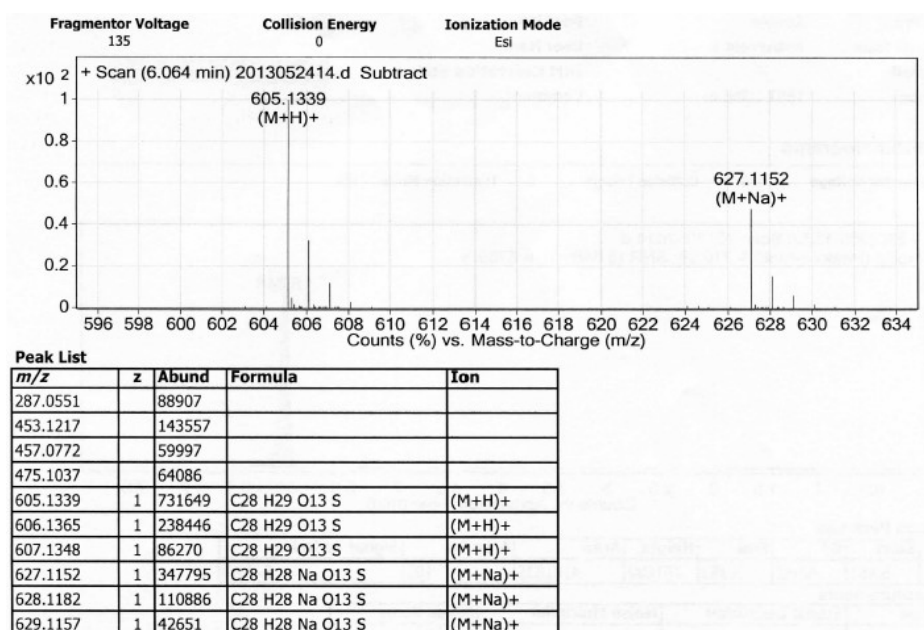

Figure S45. HRESIMS of compound **JP-15**

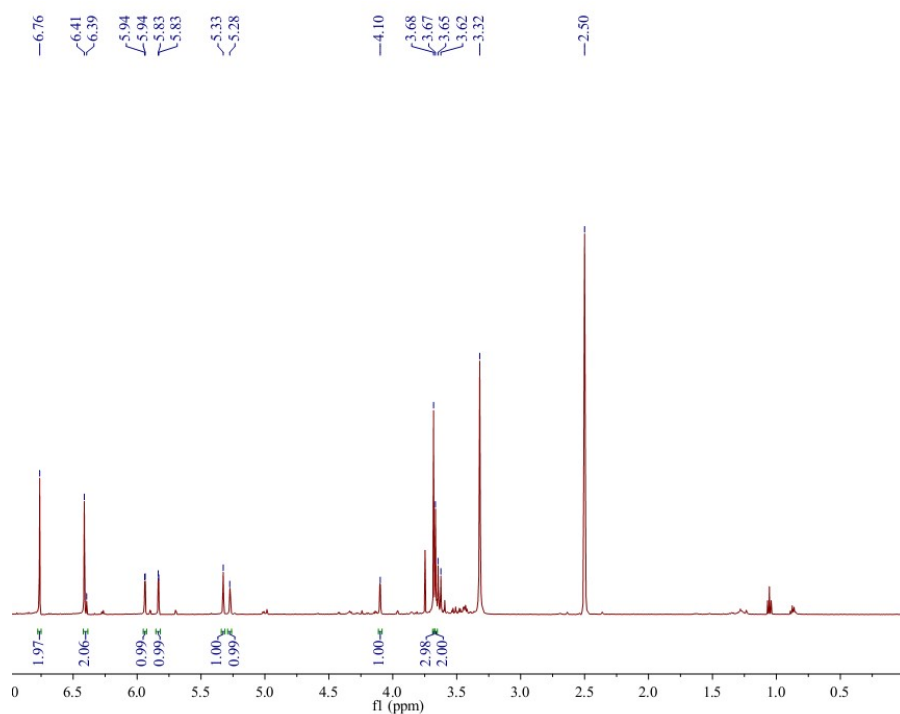

Figure S46. <sup>1</sup>H NMR of compound **JP-16** (DMSO-*d*<sub>6</sub>)



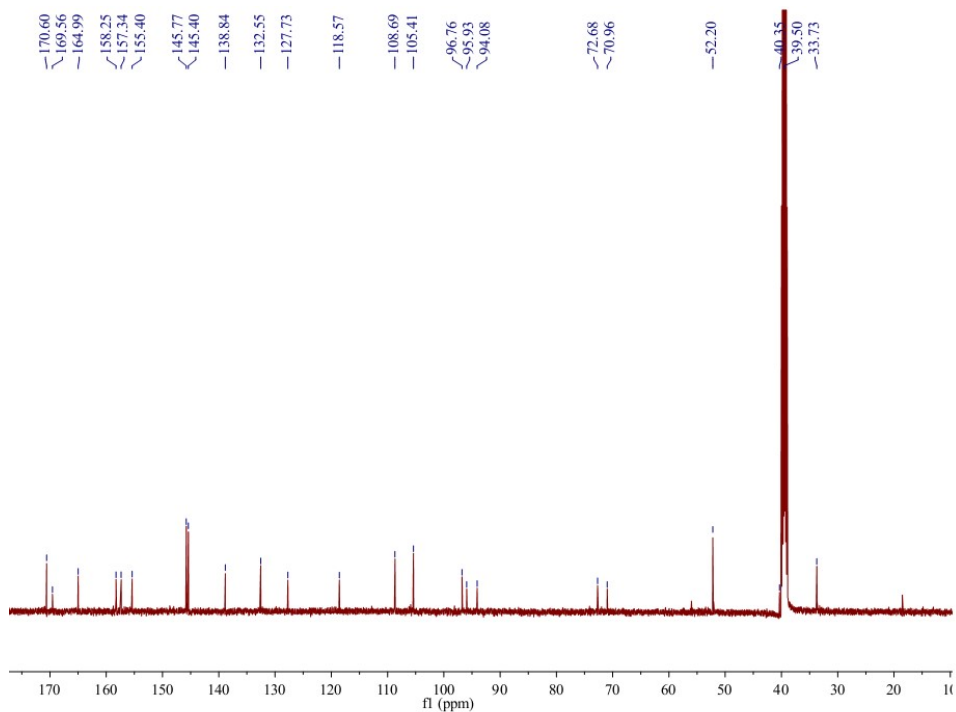

Figure S47.  $^{13}\text{C}$  NMR of compound **JP-16** ( $\text{DMSO-}d_6$ )

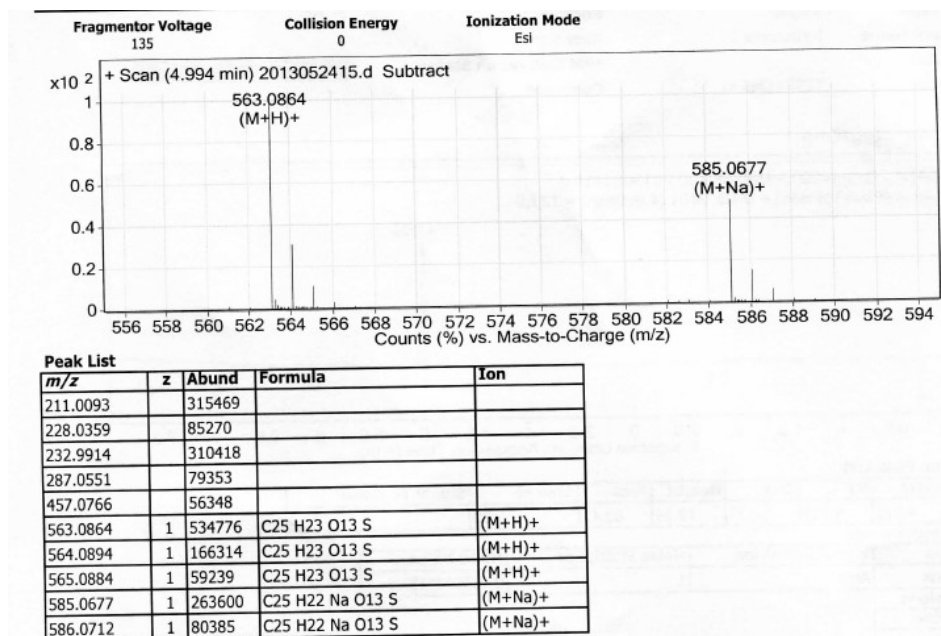

Figure S48. HRSIMS of compound **JP-16** ( $\text{DMSO-}d_6$ )

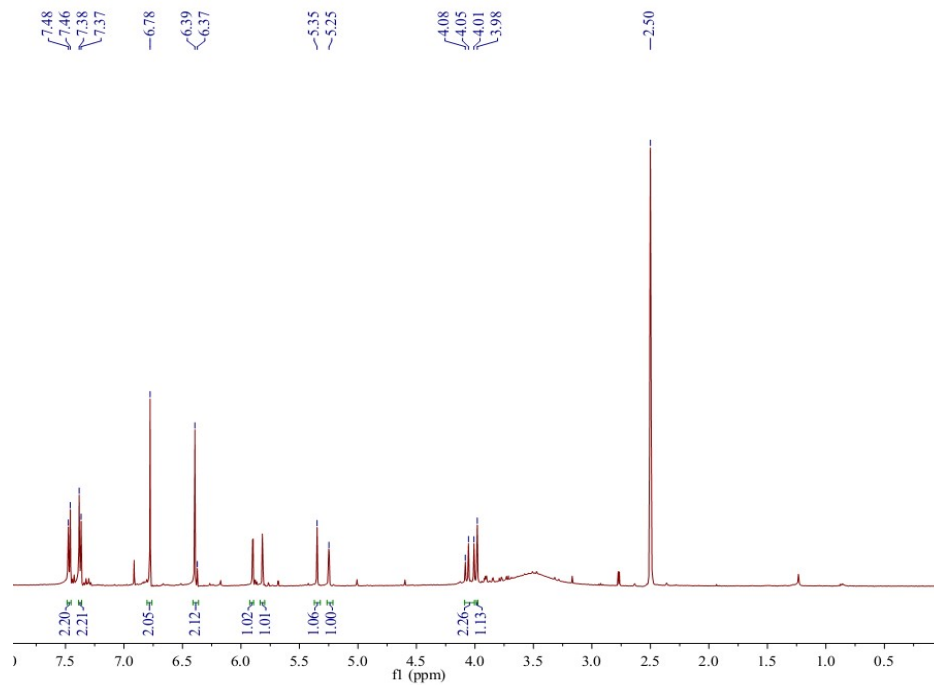

Figure S49.  $^1\text{H}$  NMR of compound **JP-17** ( $\text{DMSO-}d_6$ )

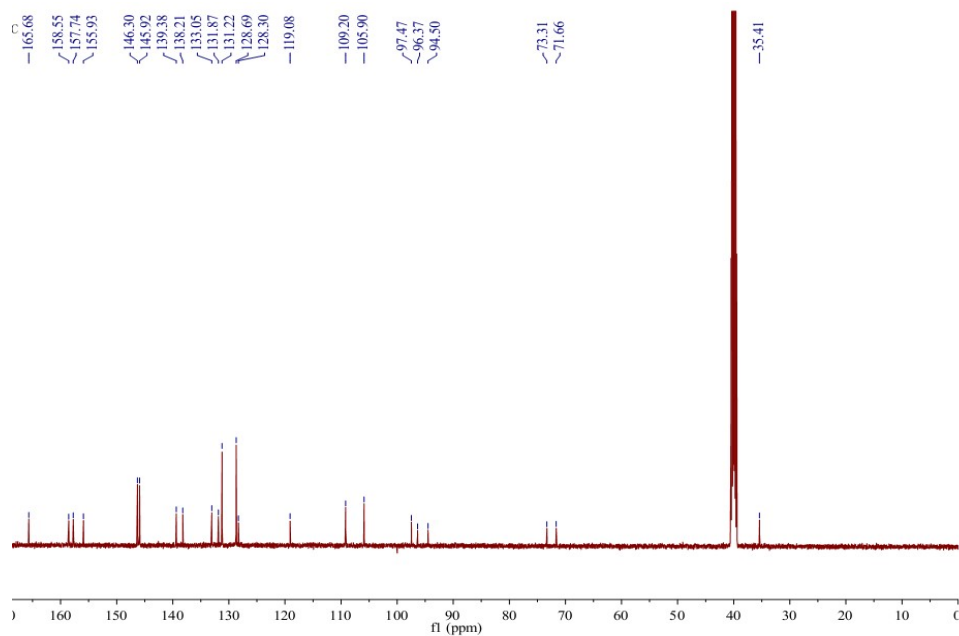

Figure S50.  $^{13}\text{C}$  NMR of compound **JP-17** ( $\text{DMSO-}d_6$ )

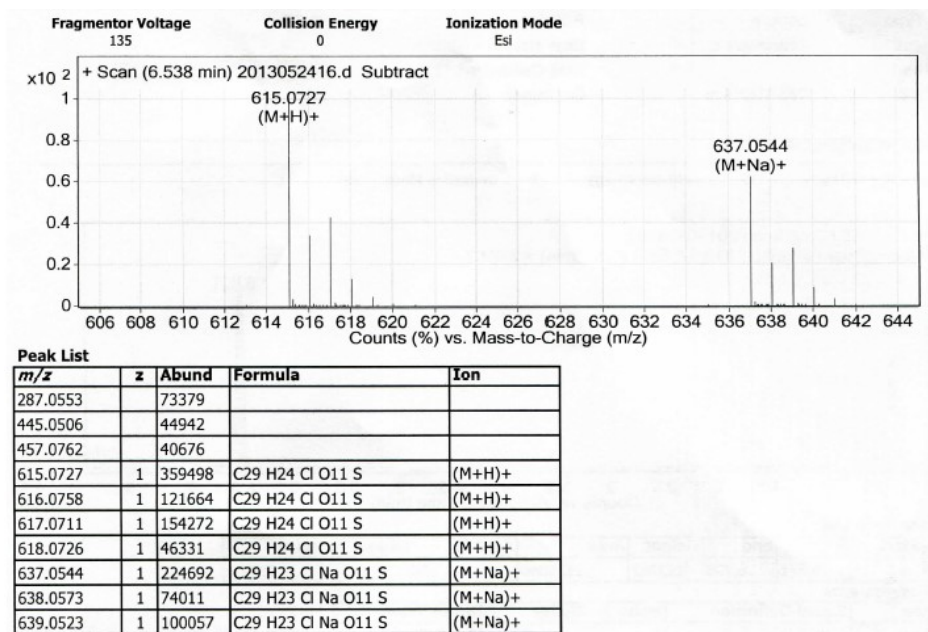

Figure S51. HRESIMS of compound **JP-17**

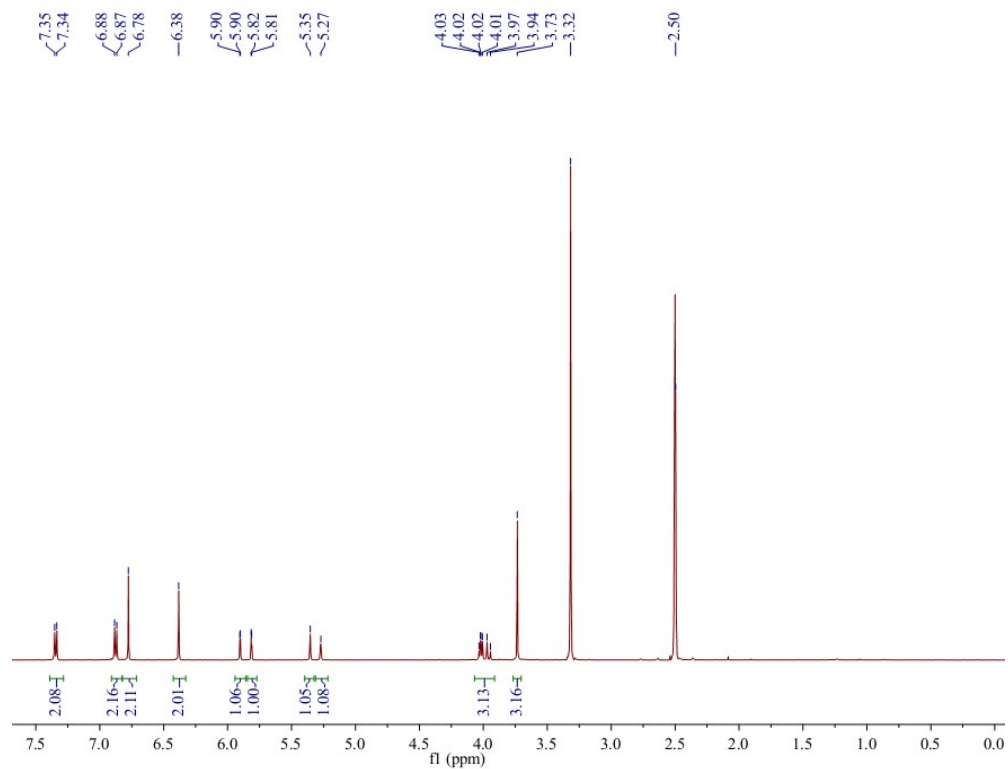

Figure S52. <sup>1</sup>H NMR of compound **JP-18** (DMSO-*d*<sub>6</sub>)

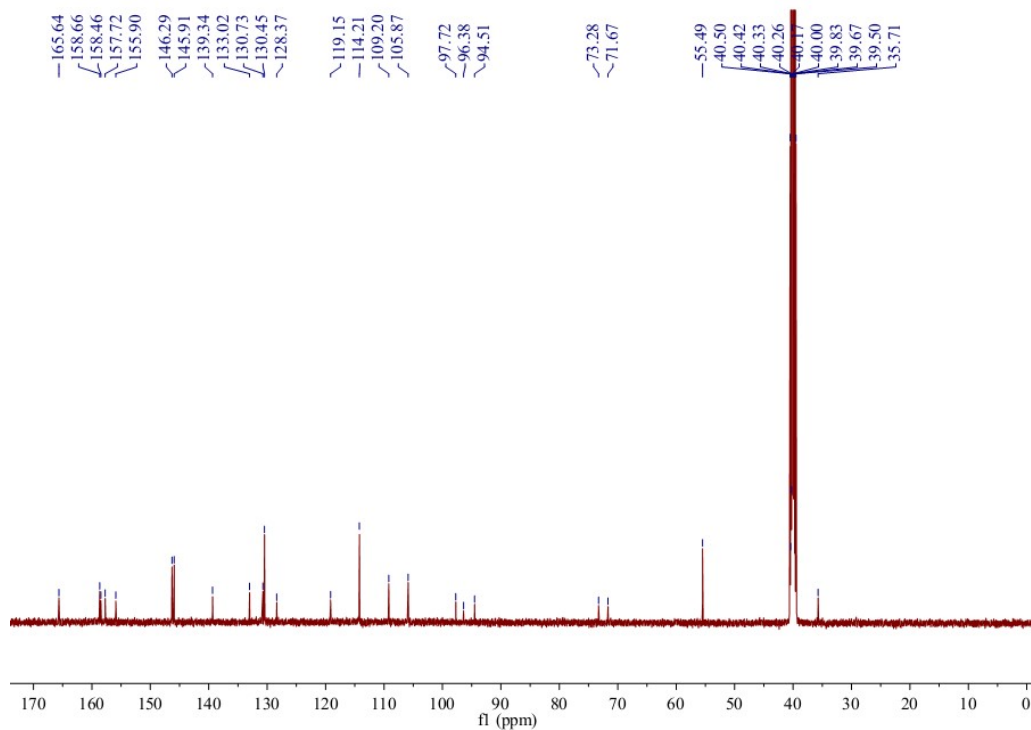

Figure S53.  $^{13}\text{C}$  NMR of compound **JP-18** ( $\text{DMSO-}d_6$ )

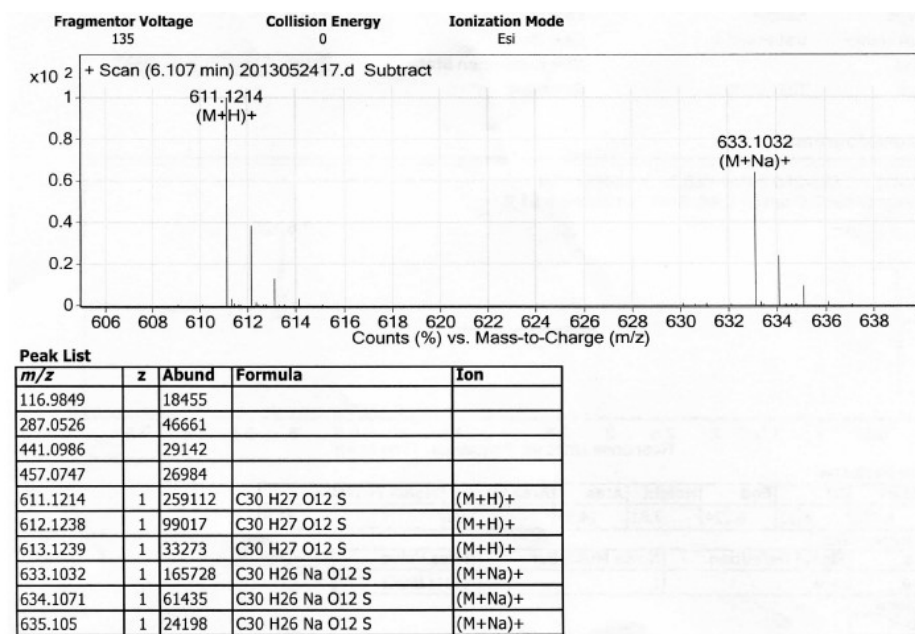

Figure S54. HRESIMS of compound **JP-18**

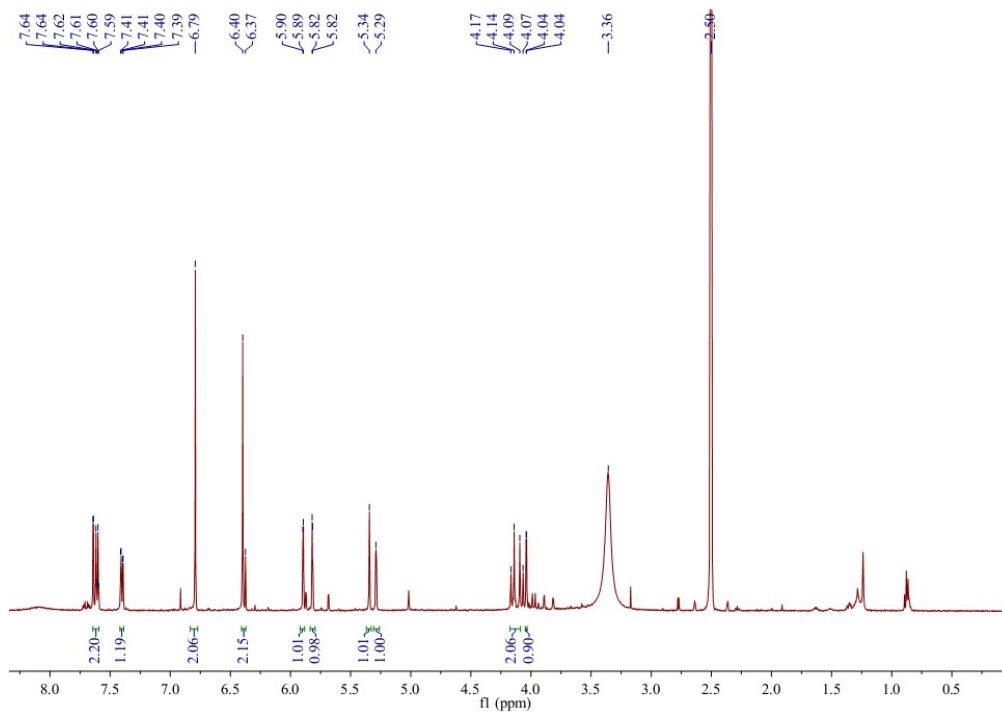

Figure S55.  $^1\text{H}$  NMR of compound **JP-19** ( $\text{DMSO-}d_6$ )

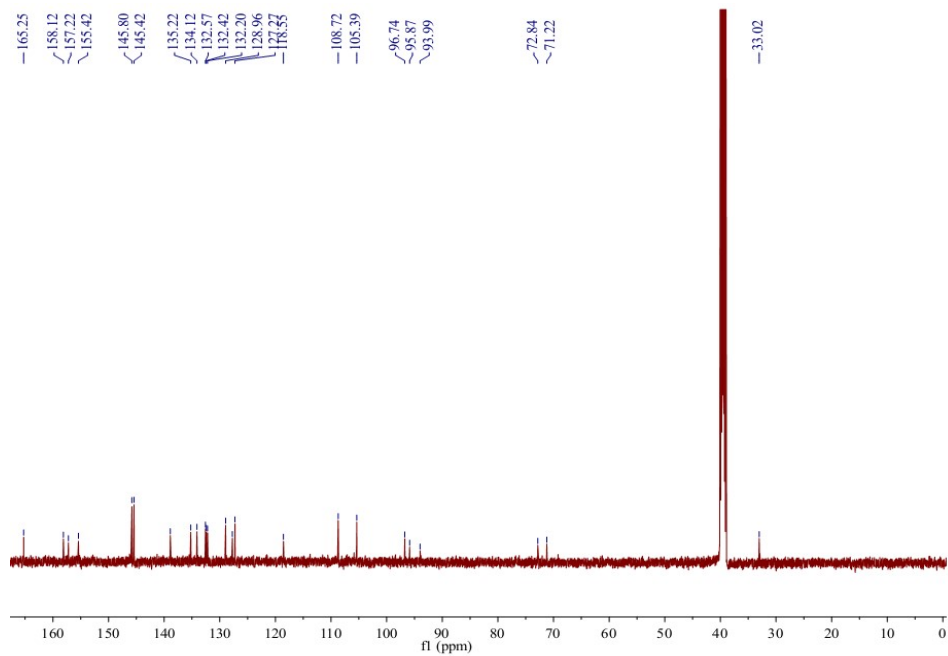

Figure S56.  $^{13}\text{C}$  NMR of compound **JP-19** ( $\text{DMSO-}d_6$ )

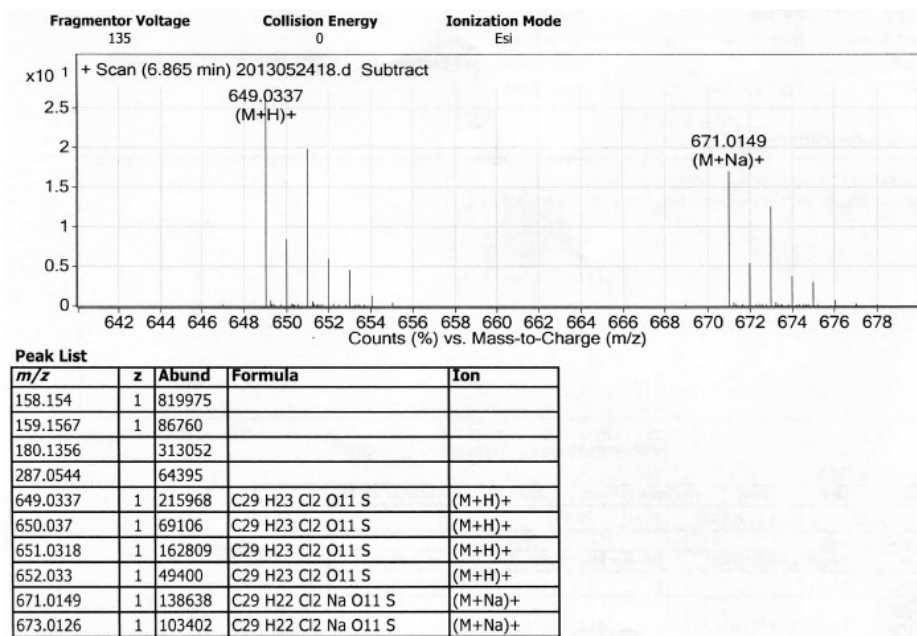

Figure S57. HRESIMS of compound **JP-19**

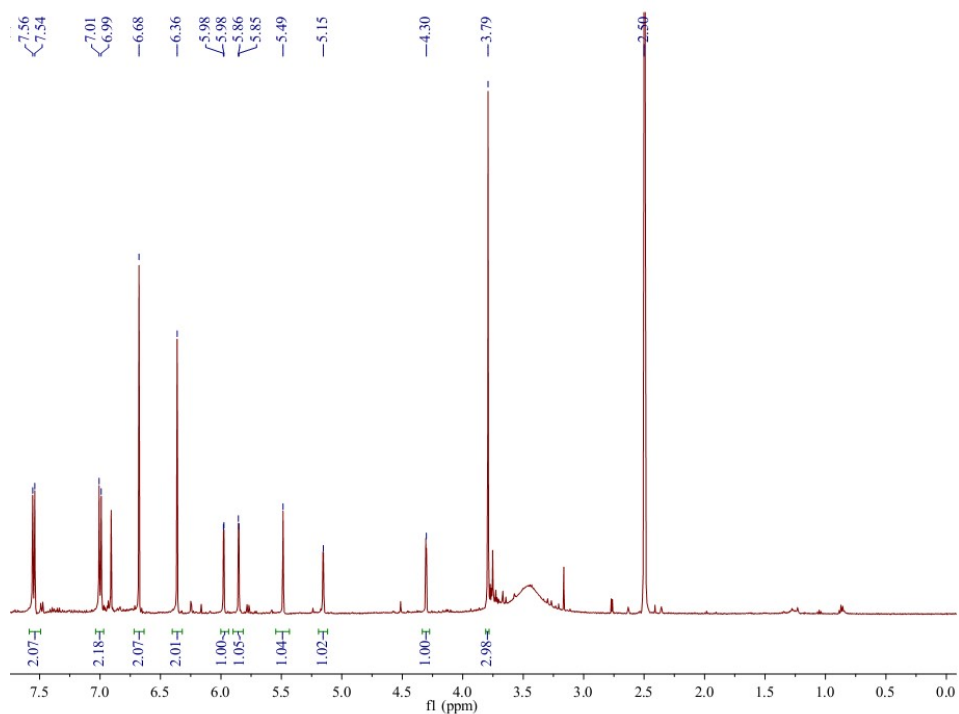

Figure S58. <sup>1</sup>H NMR of compound **JP-20** (DMSO-*d*<sub>6</sub>)

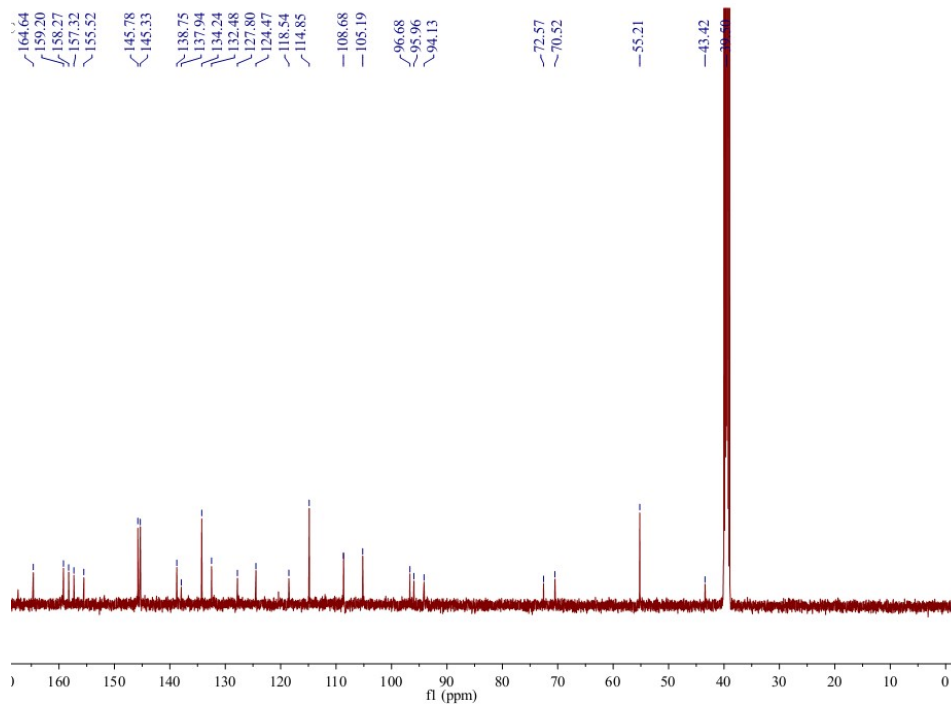

Figure S59.  $^{13}\text{C}$  NMR of compound **JP-20** ( $\text{DMSO-}d_6$ )

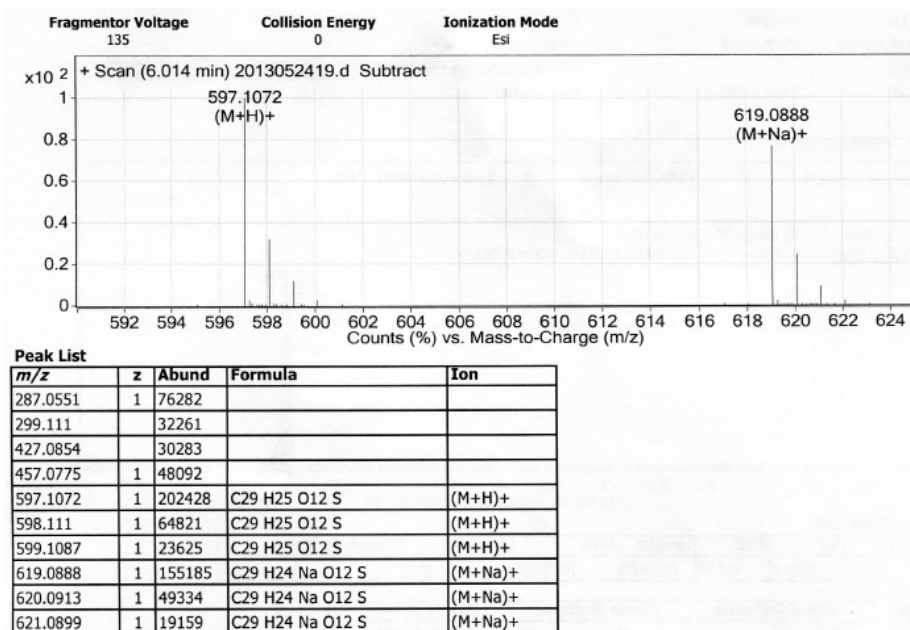

Figure S60. HRESIMS of compound **JP-20**

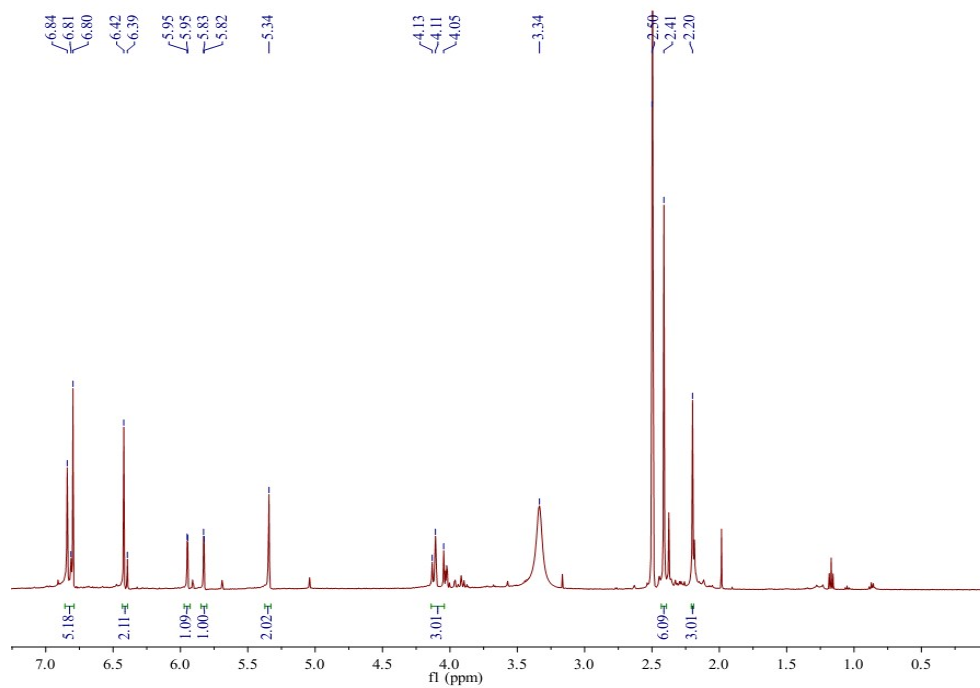

Figure S61.  $^1\text{H}$  NMR of compound **JP-21** ( $\text{DMSO-}d_6$ )

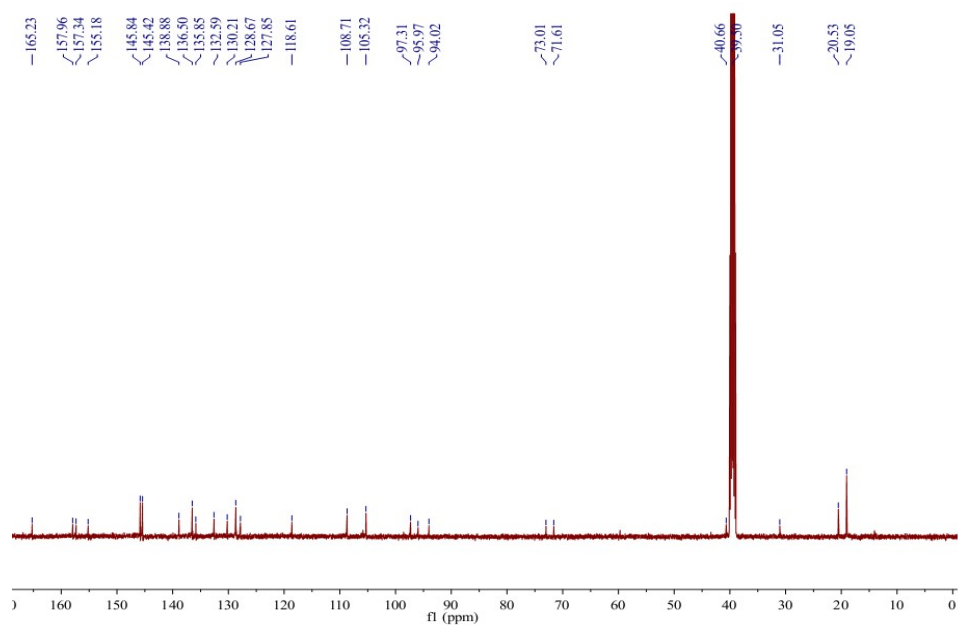

Figure S62.  $^{13}\text{C}$  NMR of compound **JP-21** ( $\text{DMSO-}d_6$ )



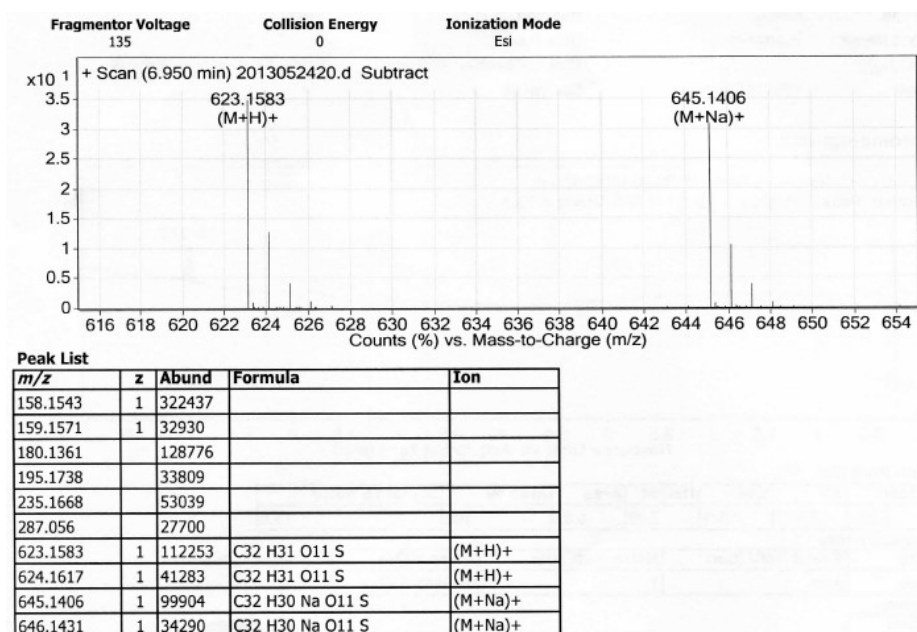

Figure S63. HRESIMS of compound **JP-21**

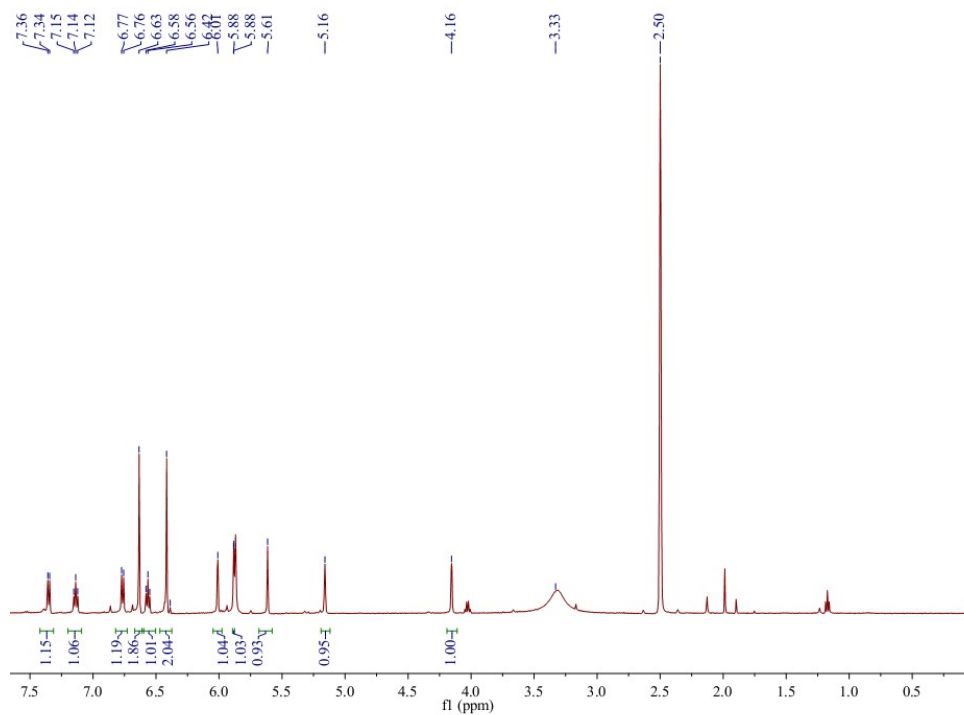

Figure S64.  $^1\text{H}$  NMR of compound **JP-22** ( $\text{DMSO-}d_6$ )

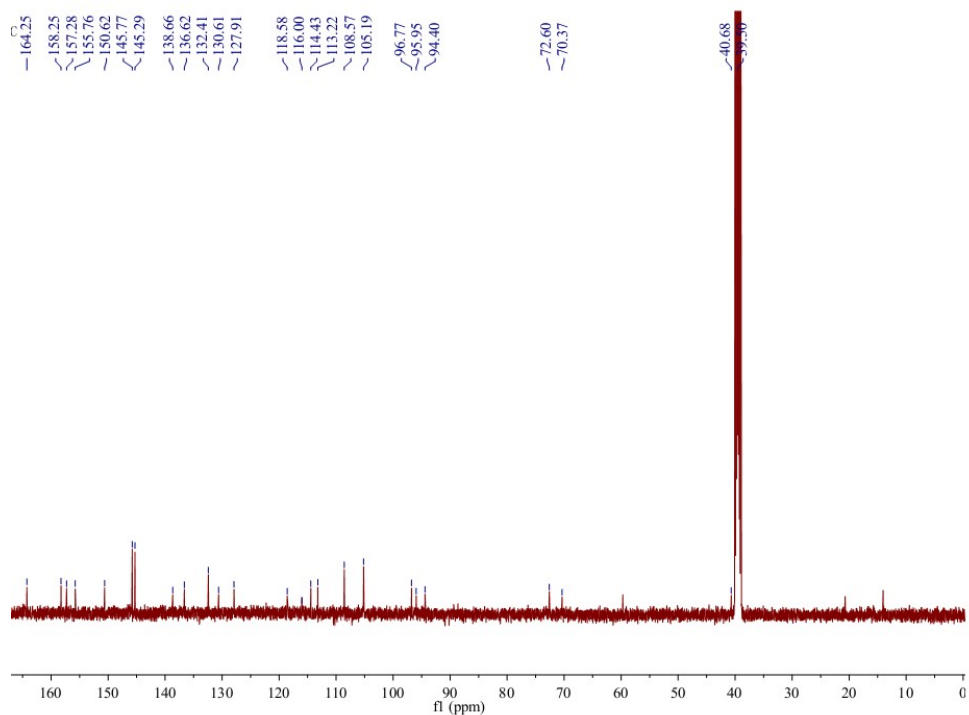

Figure S65.  $^1\text{H}$  NMR of compound **JP-22** ( $\text{DMSO-}d_6$ )

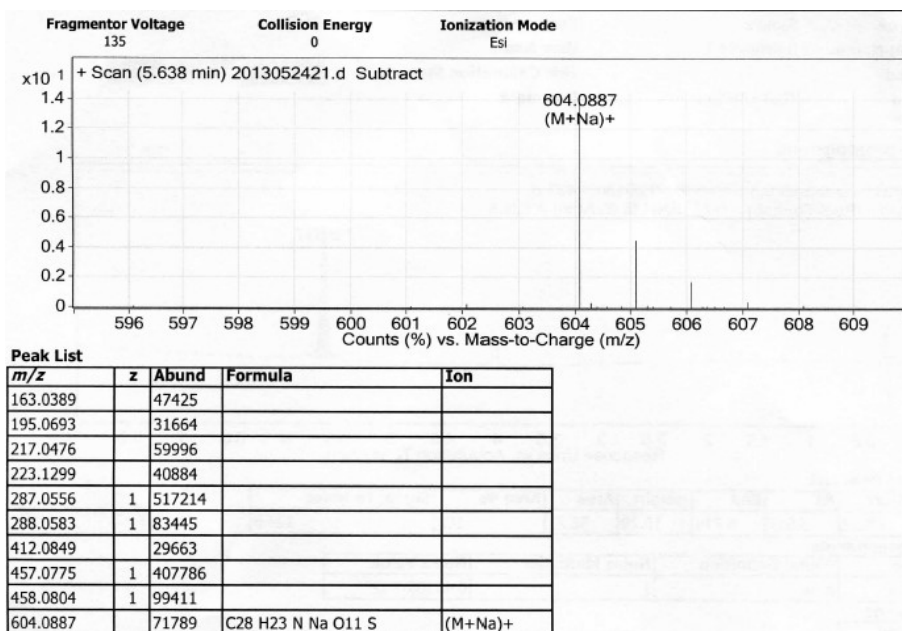

Figure S66. HRESIMS of compound **JP-22**

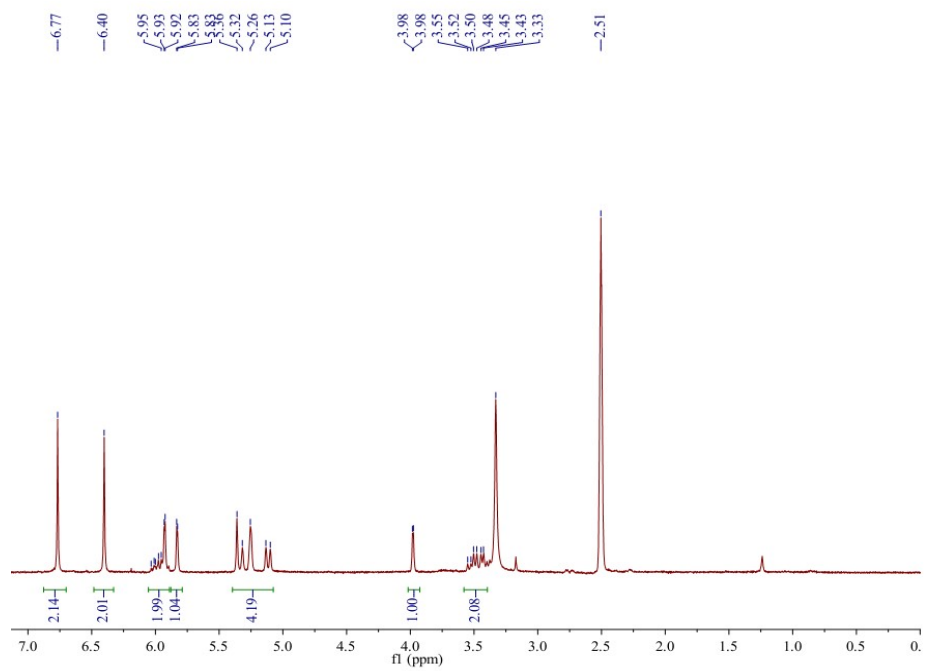

Figure S67.  $^1\text{H}$  NMR of compound **JP-23** ( $\text{DMSO-}d_6$ )

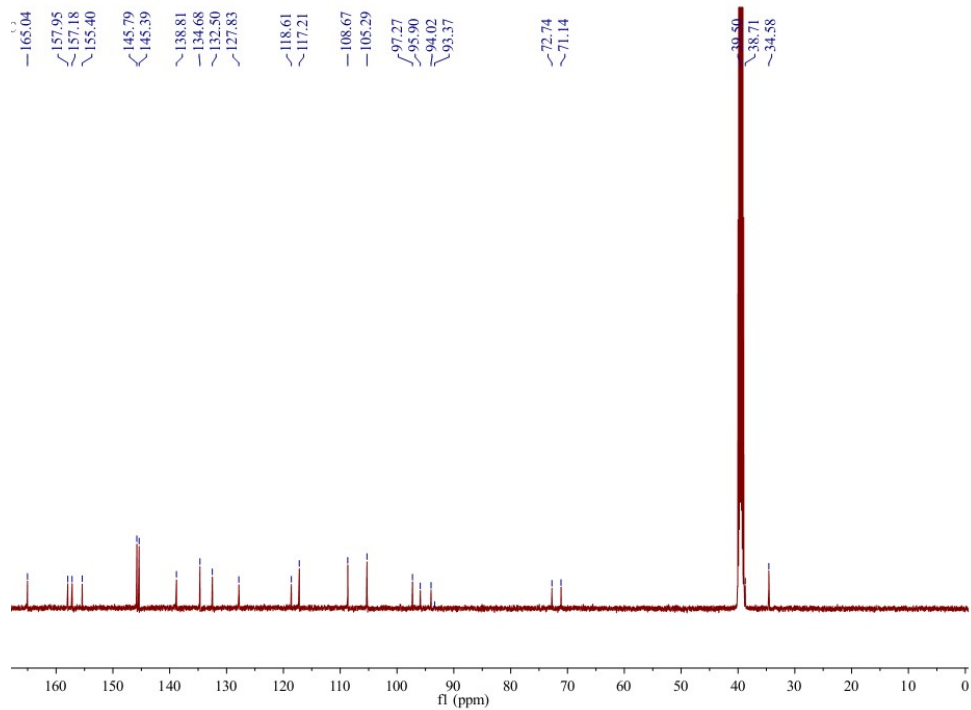

Figure S68.  $^{13}\text{C}$  NMR of compound **JP-23** ( $\text{DMSO-}d_6$ )

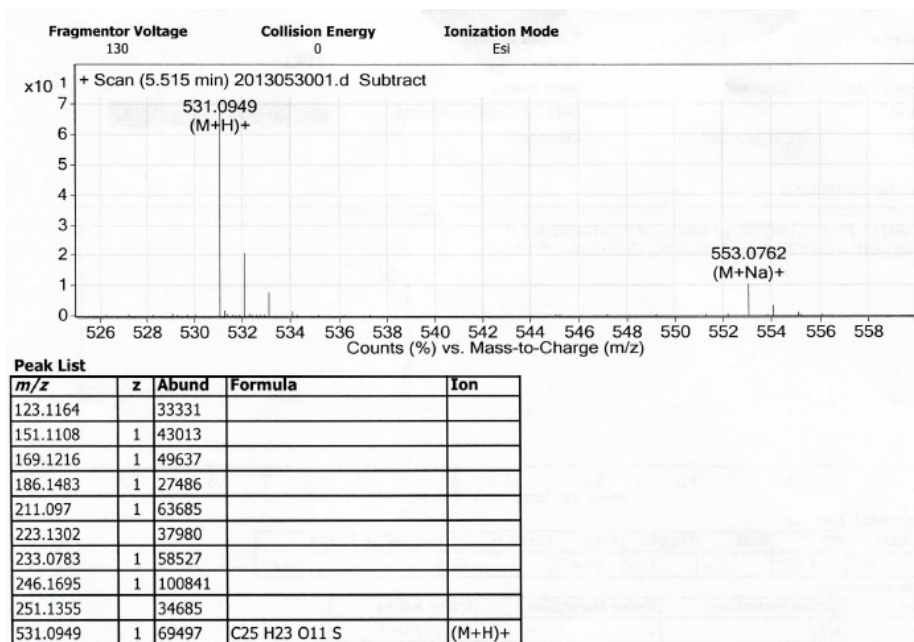

Figure S69. HRESIMS of compound **JP-23**

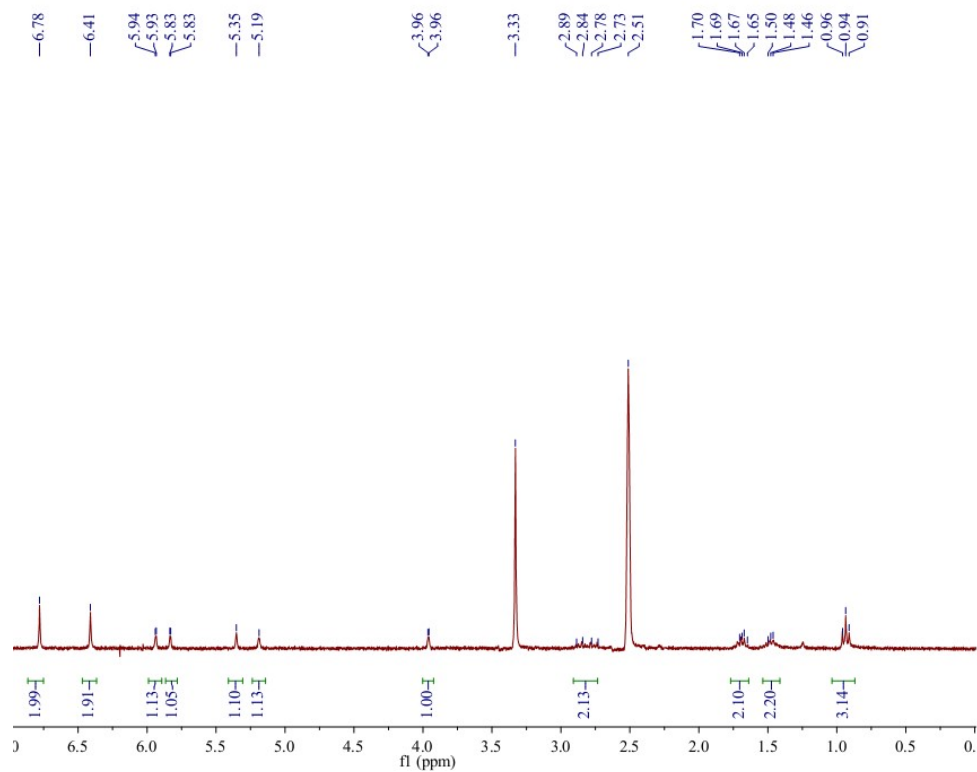

Figure S70. <sup>1</sup>H NMR of compound **JP-24** (DMSO-*d*<sub>6</sub>)

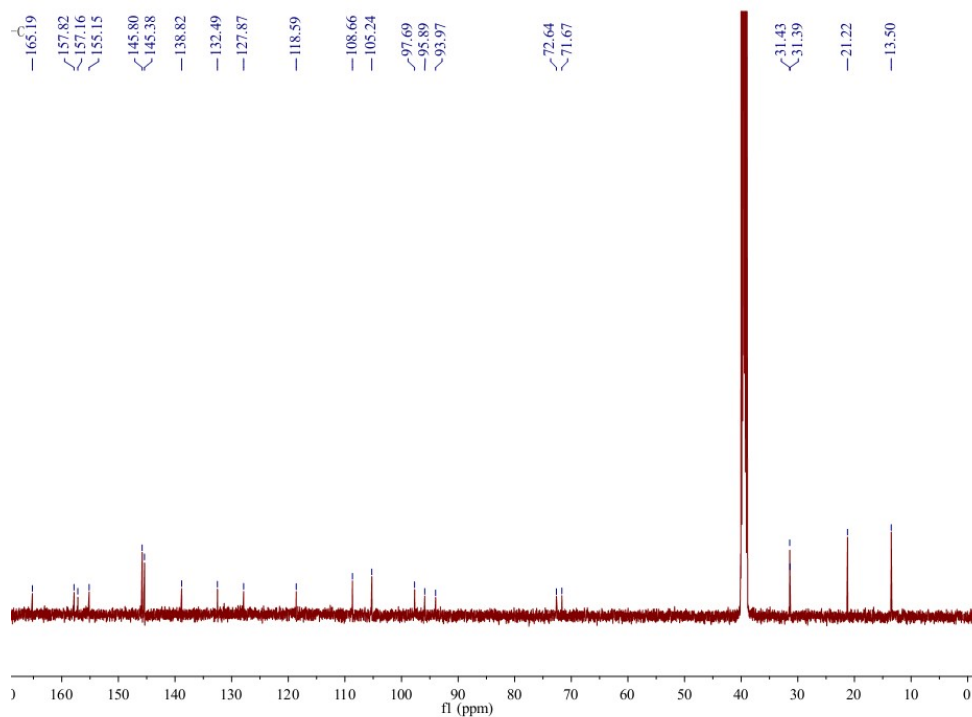

Figure S71.  $^{13}\text{C}$  NMR of compound **JP-24** ( $\text{DMSO-}d_6$ )

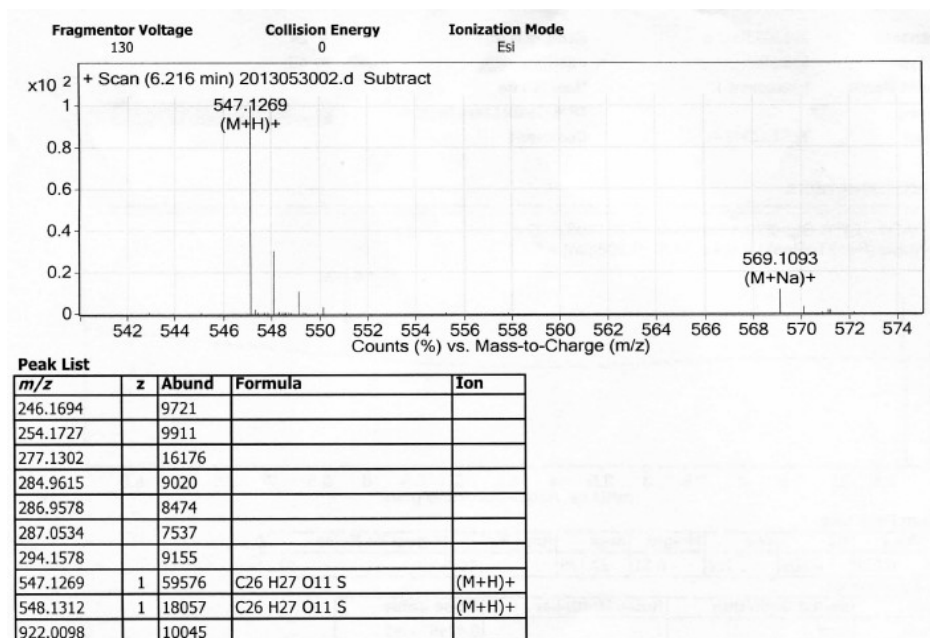

Figure S72. HRESIMS of compound **JP-24**

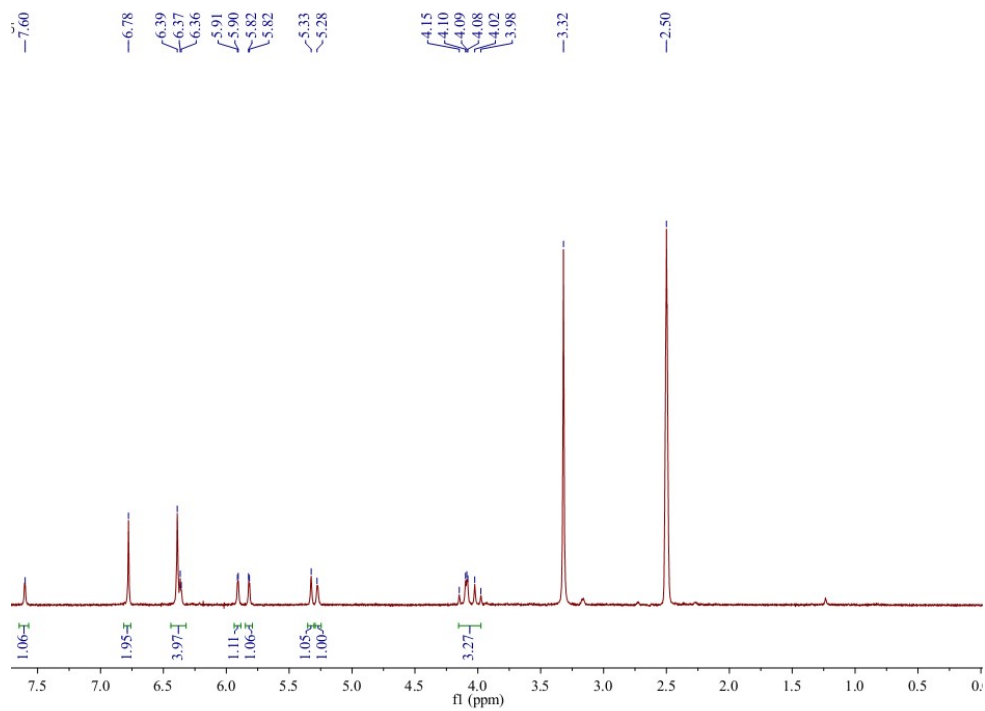

Figure S73.  $^1\text{H}$  NMR of compound **JP-25** ( $\text{DMSO-}d_6$ )

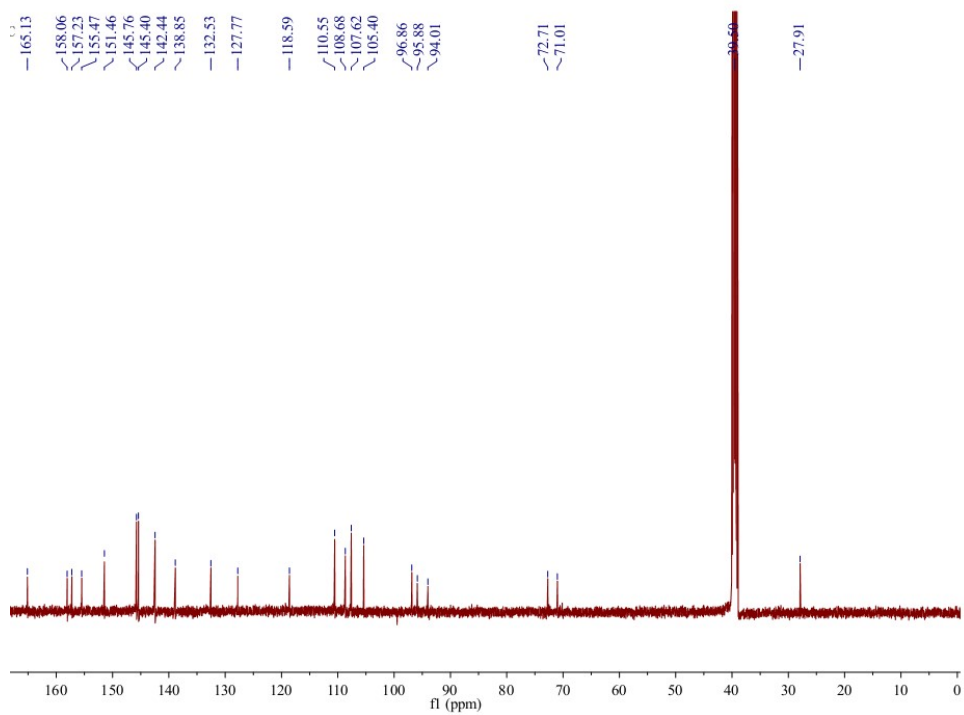

Figure S74.  $^{13}\text{C}$  NMR of compound **JP-25** ( $\text{DMSO-}d_6$ )

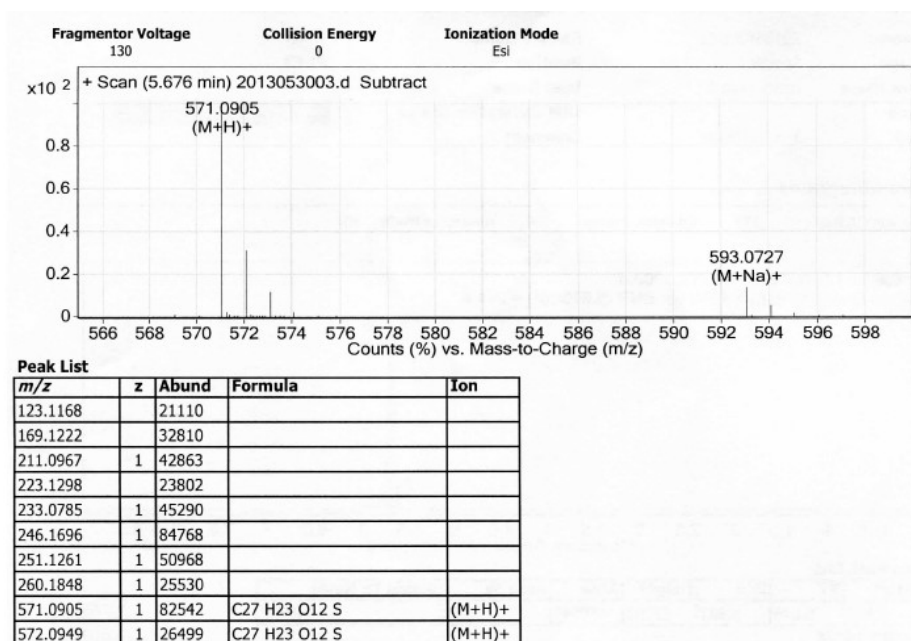

Figure S75. HRESIMS of compound **JP-25**

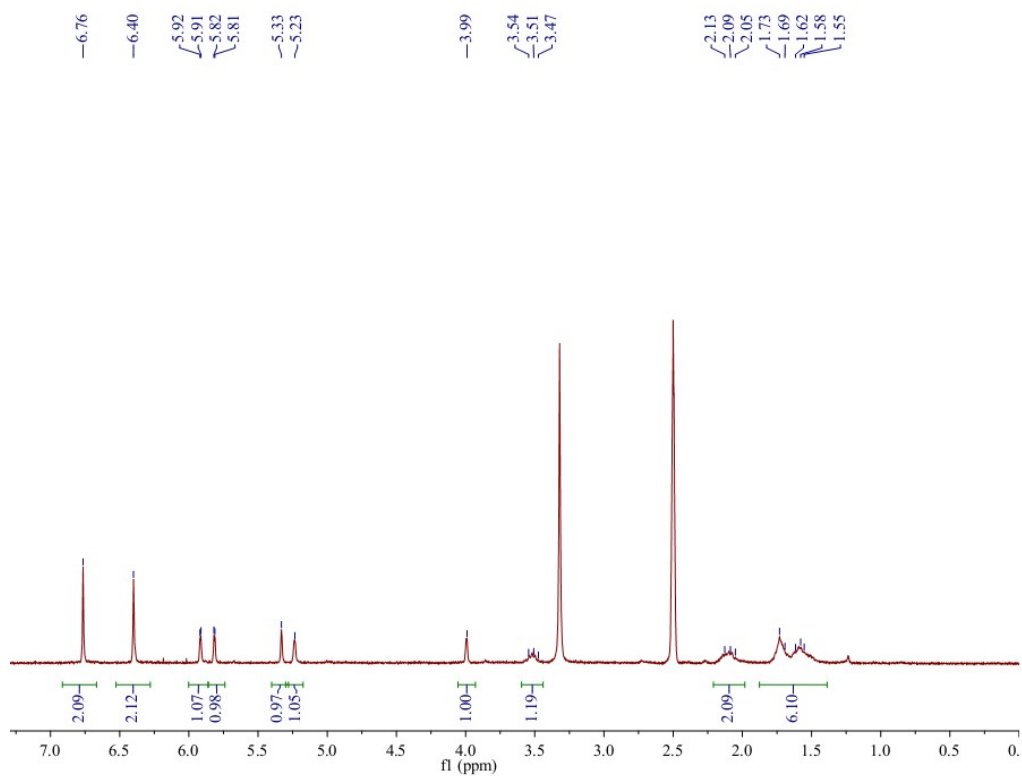

Figure S76. <sup>1</sup>H NMR of compound **JP-26** (DMSO-*d*<sub>6</sub>)

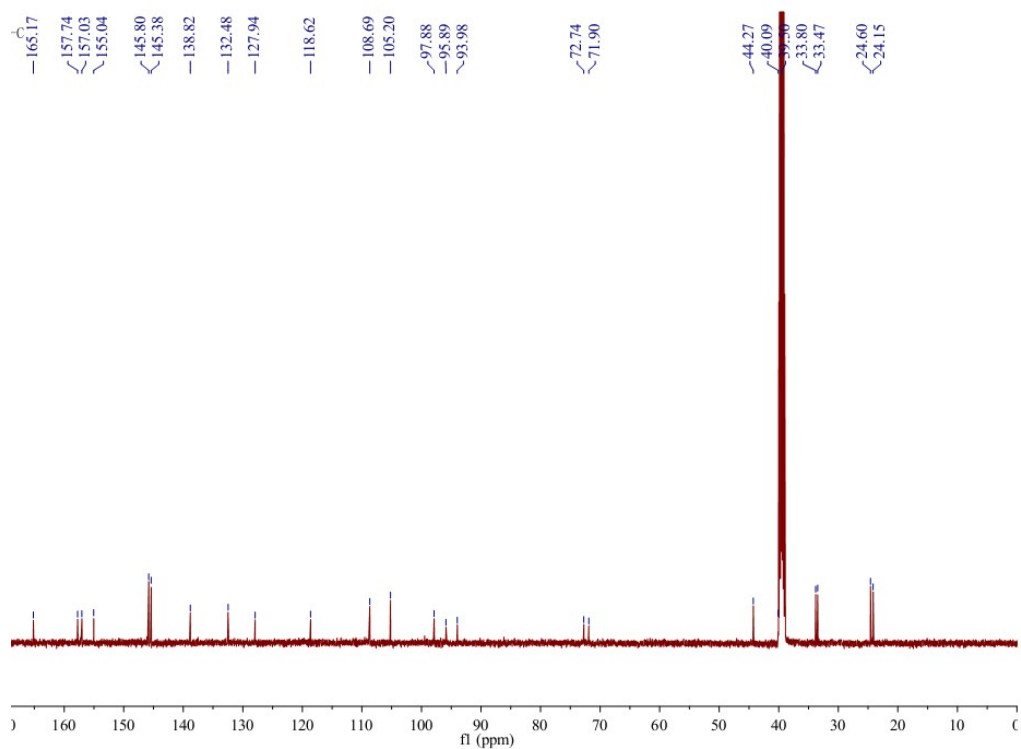

Figure S77.  $^1\text{H}$  NMR of compound **JP-26** ( $\text{DMSO-}d_6$ )

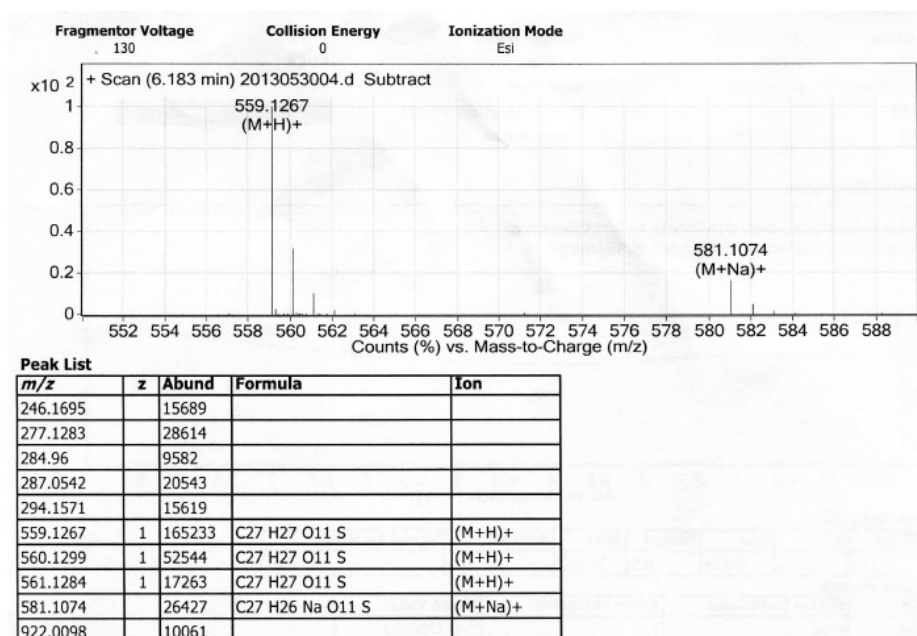

Figure S78. HRMSIMS of compound **JP-26**



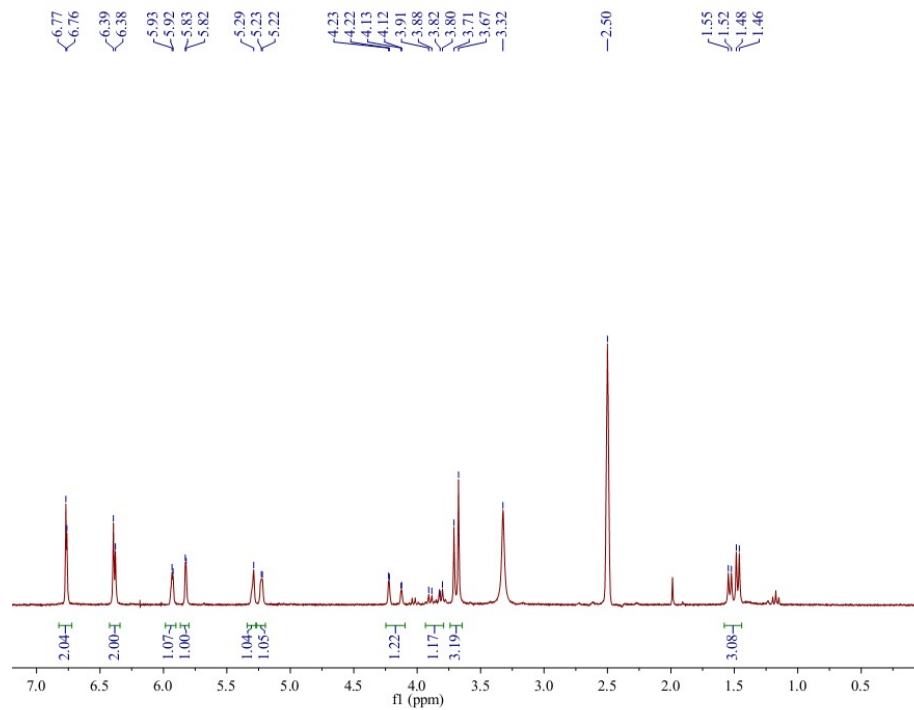

Figure S79.  $^1\text{H}$  NMR of compound **JP-27** ( $\text{DMSO-}d_6$ )

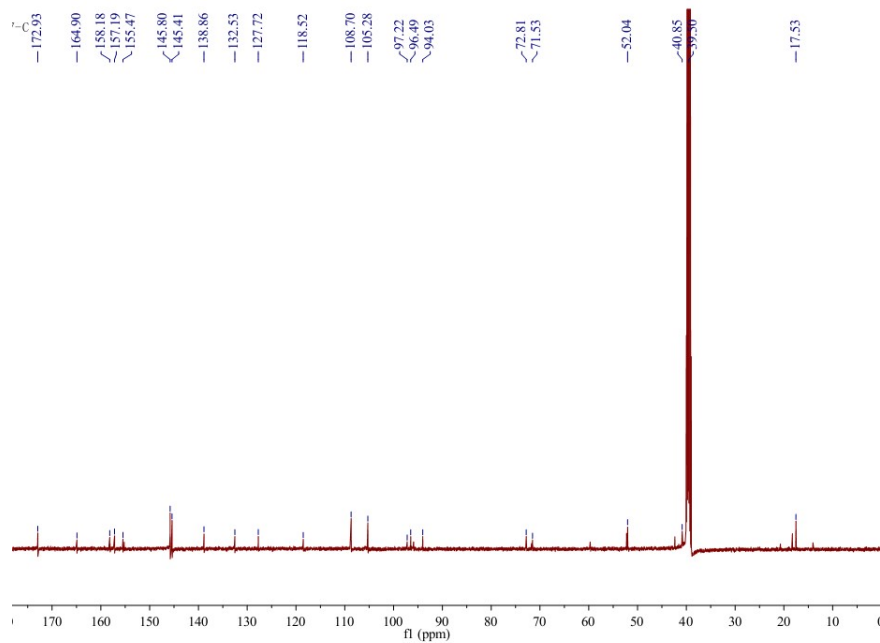

Figure S80.  $^{13}\text{C}$  NMR of compound **JP-27** ( $\text{DMSO-}d_6$ )

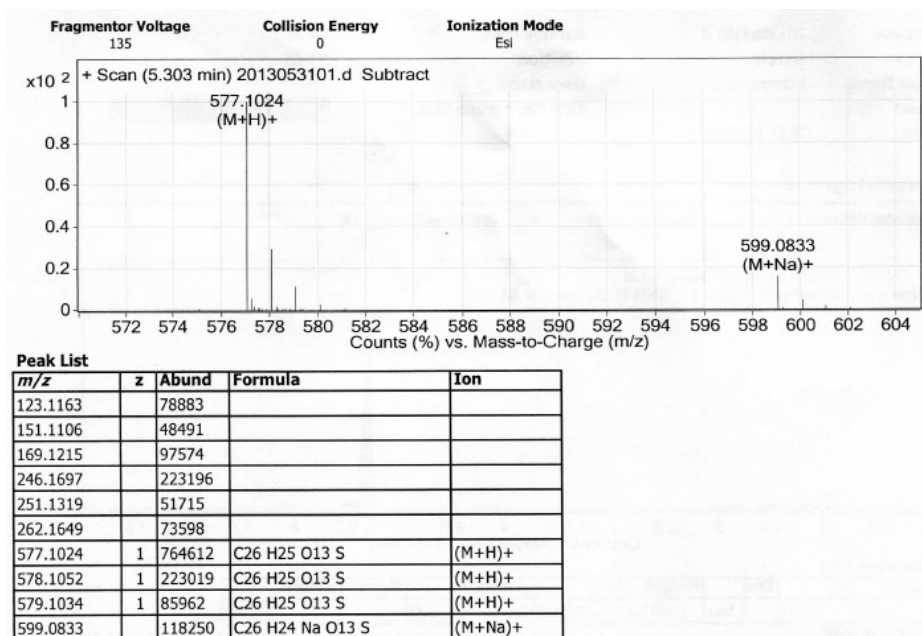

Figure S81. HRESIMS of compound **JP-27**

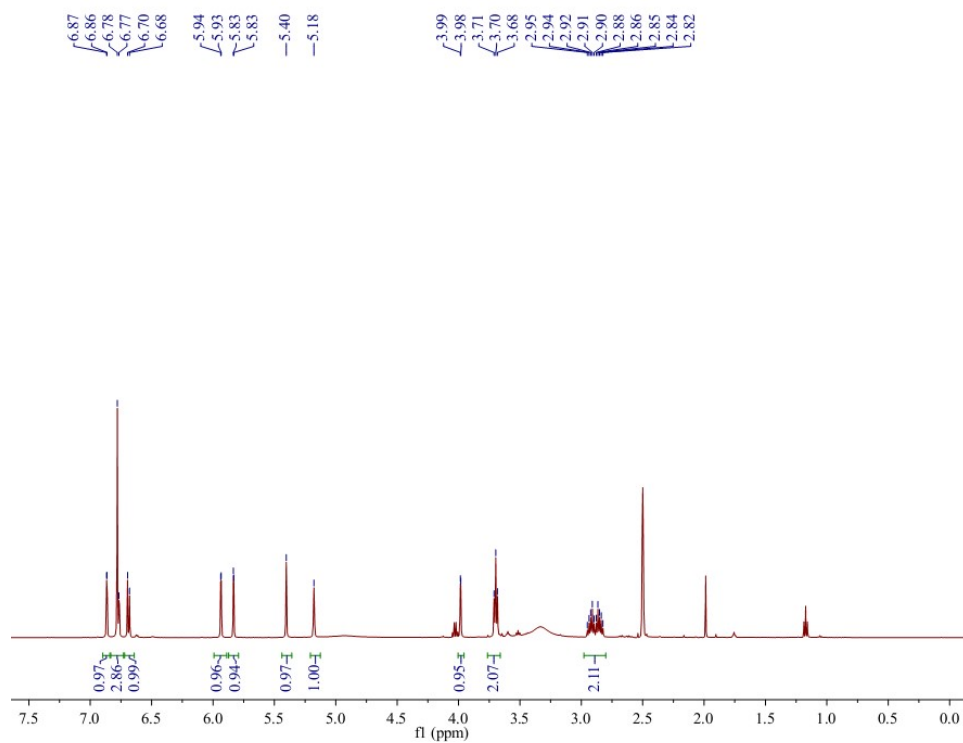

Figure S82. <sup>1</sup>H NMR of compound **JP-28** (DMSO-*d*<sub>6</sub>)

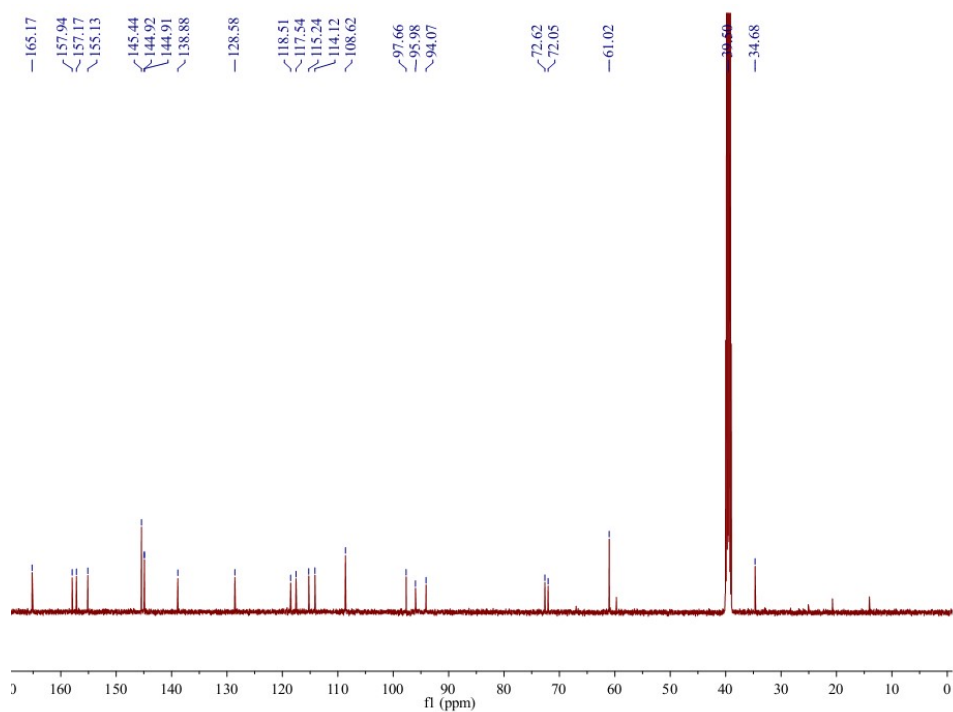

Figure S83.  $^{13}\text{C}$  NMR of compound **JP-28** ( $\text{DMSO-}d_6$ )

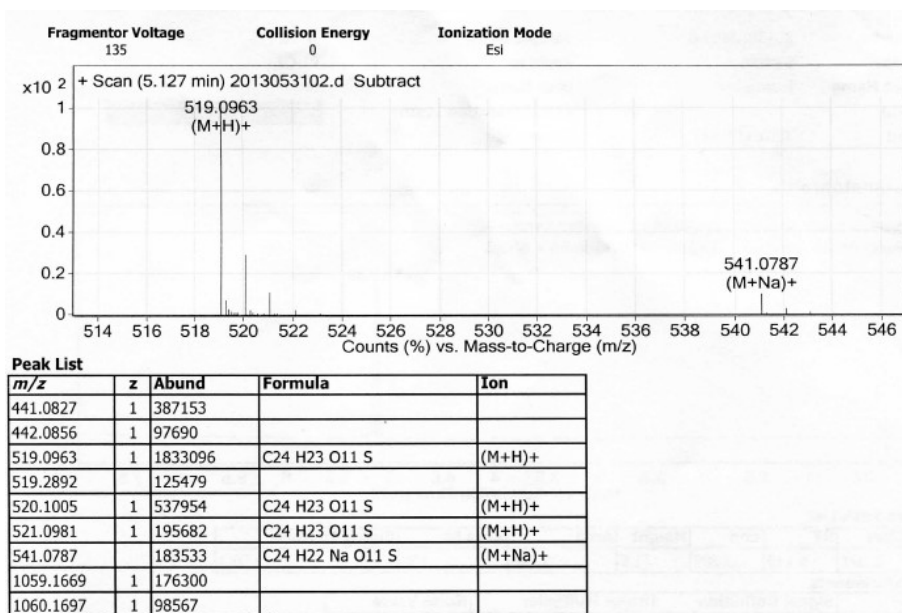

Figure S84. HRESIMS of compound **JP-28**

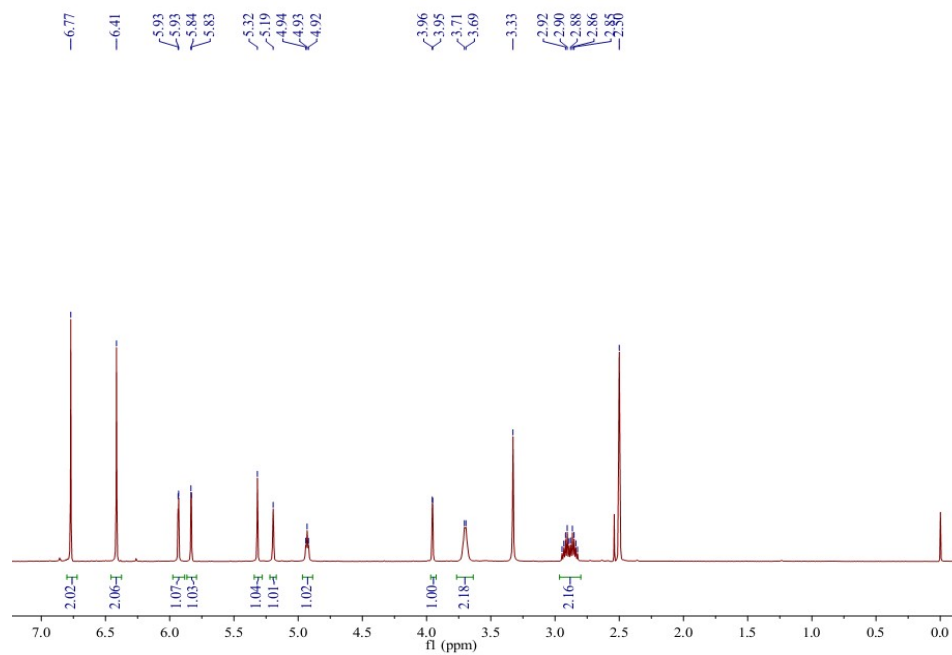

Figure S85.  $^1\text{H}$  NMR of compound **JP-29** ( $\text{DMSO-}d_6$ )

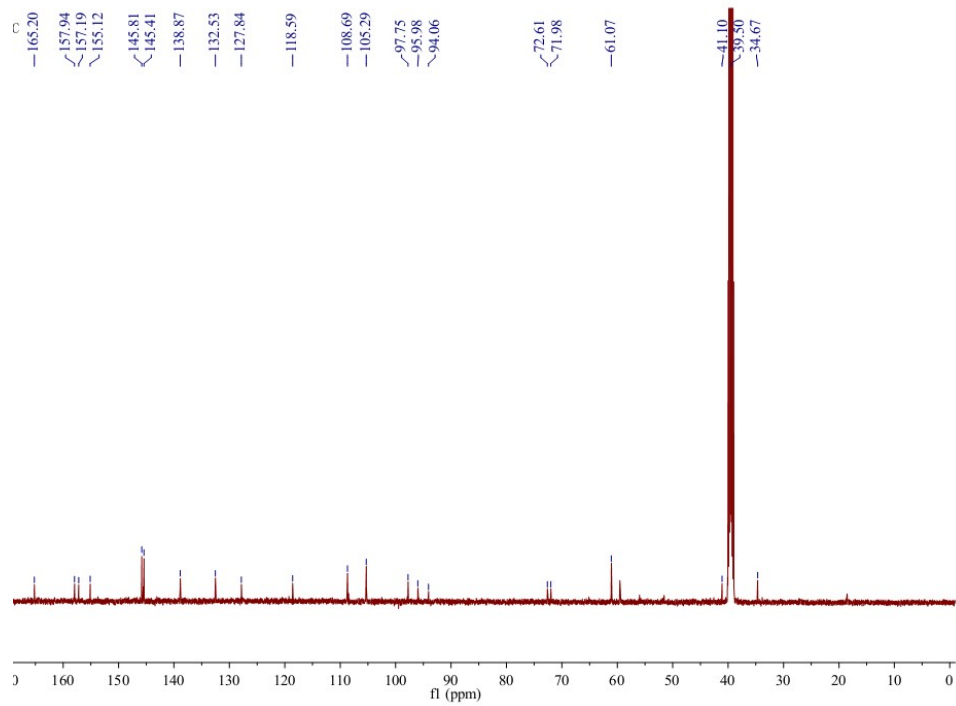

Figure S86.  $^{13}\text{C}$  NMR of compound **JP-29** ( $\text{DMSO-}d_6$ )

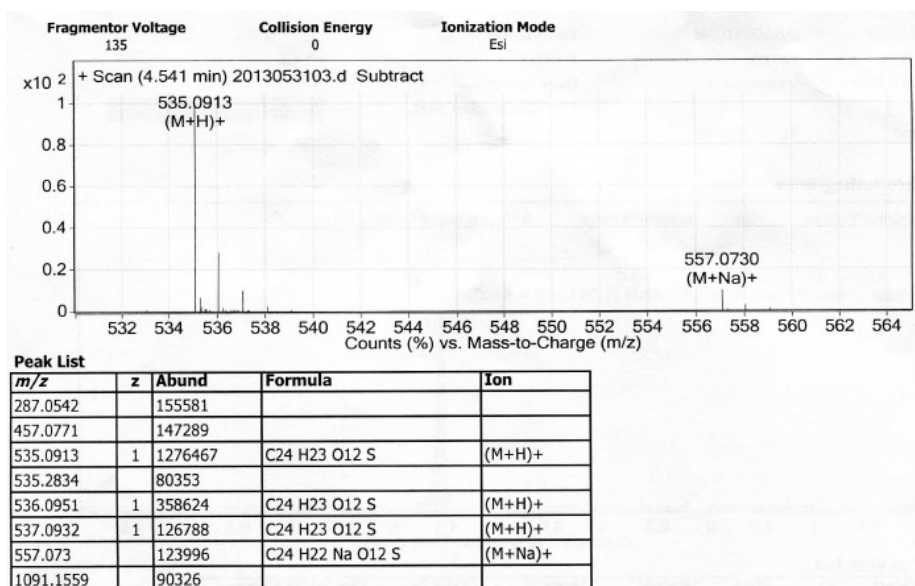

Figure S87. HRESIMS of compound **JP-29**

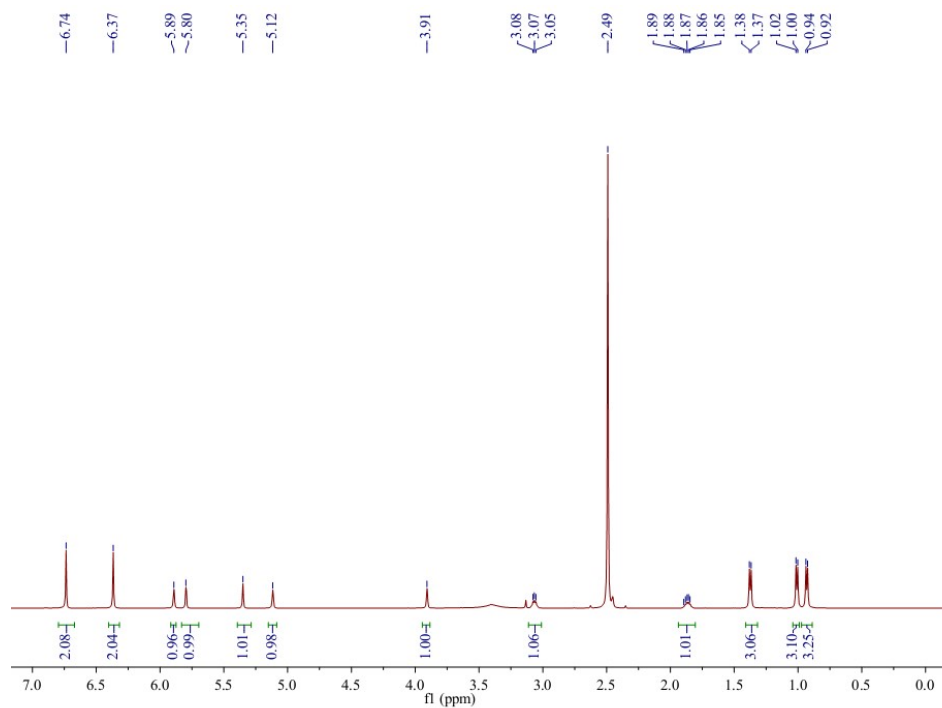

Figure S88. <sup>1</sup>H NMR of compound **JP-30** (DMSO-*d*<sub>6</sub>)

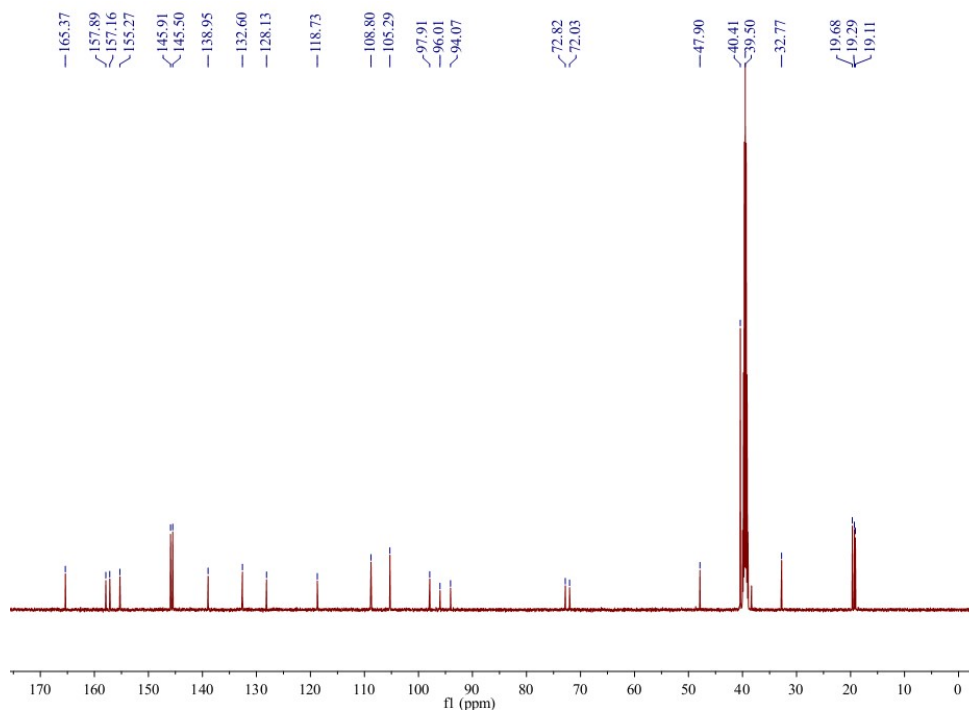

Figure S89.  $^{13}\text{C}$  NMR of compound **JP-30** ( $\text{DMSO-}d_6$ )

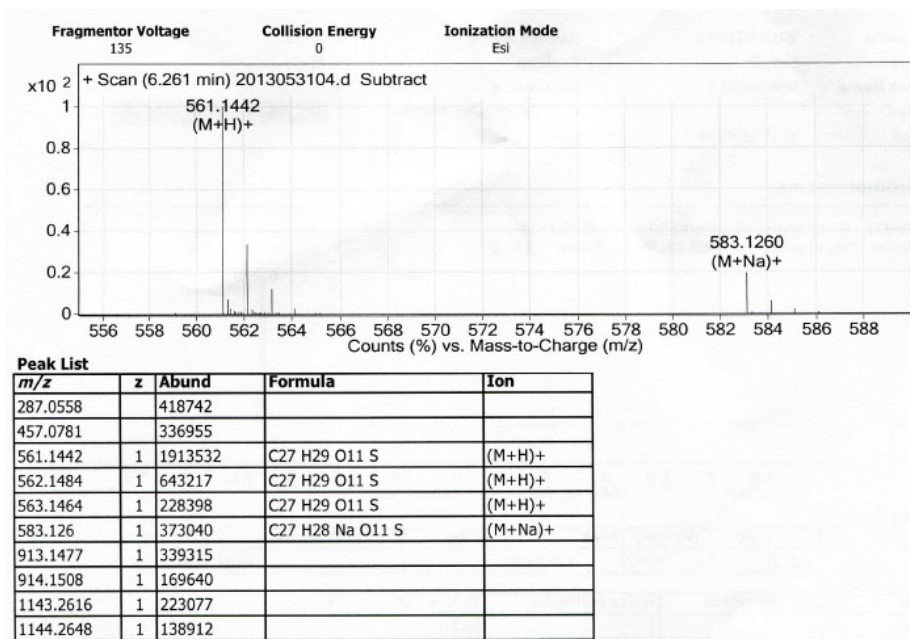

Figure S90. HRESIMS of compound **JP-30**

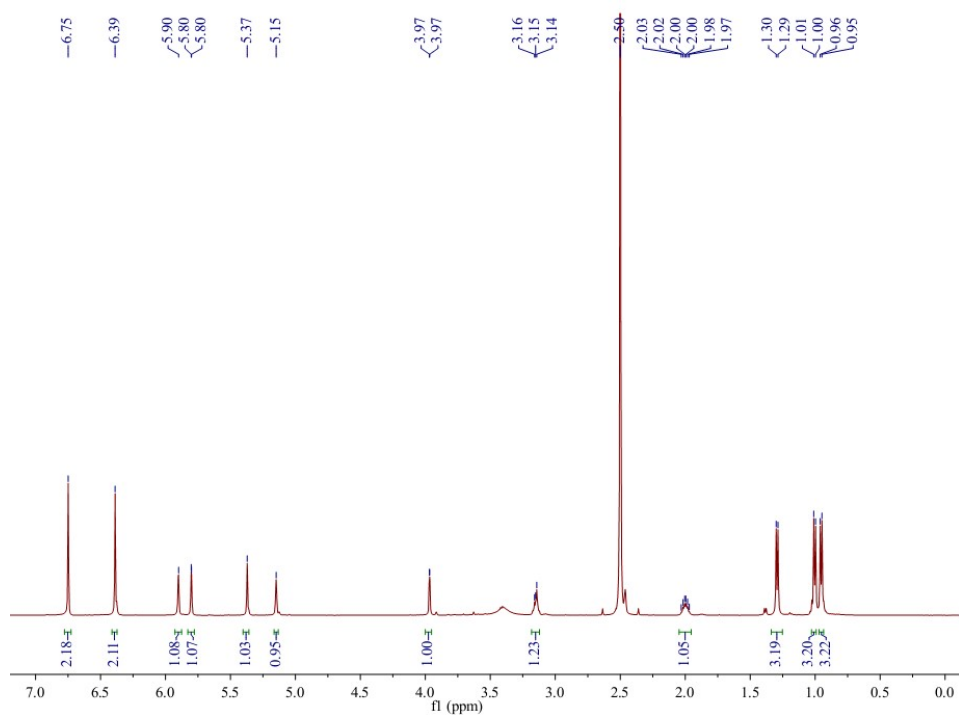

Figure S91.  $^1\text{H}$  NMR of compound **JP-31** ( $\text{DMSO-}d_6$ )

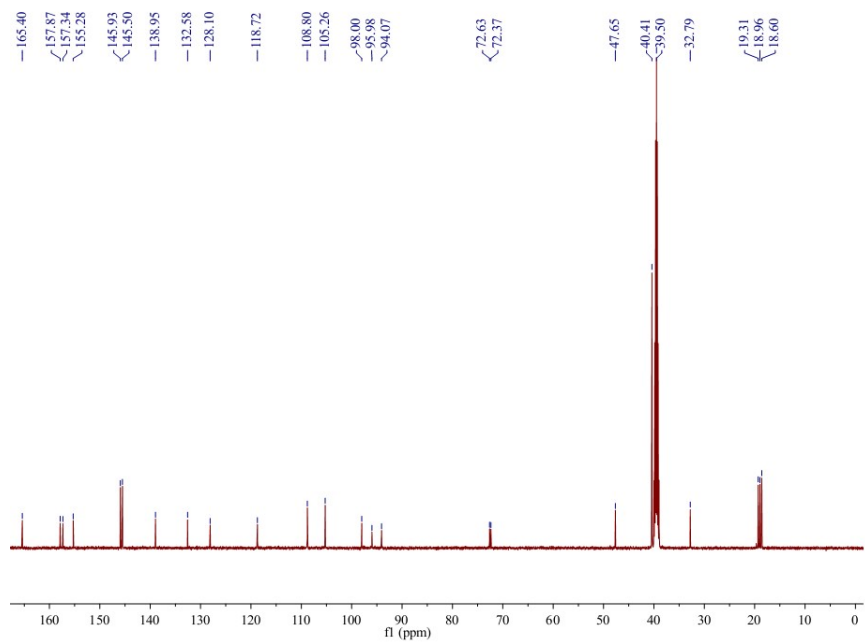

Figure S92.  $^{13}\text{C}$  NMR of compound **JP-31** ( $\text{DMSO-}d_6$ )

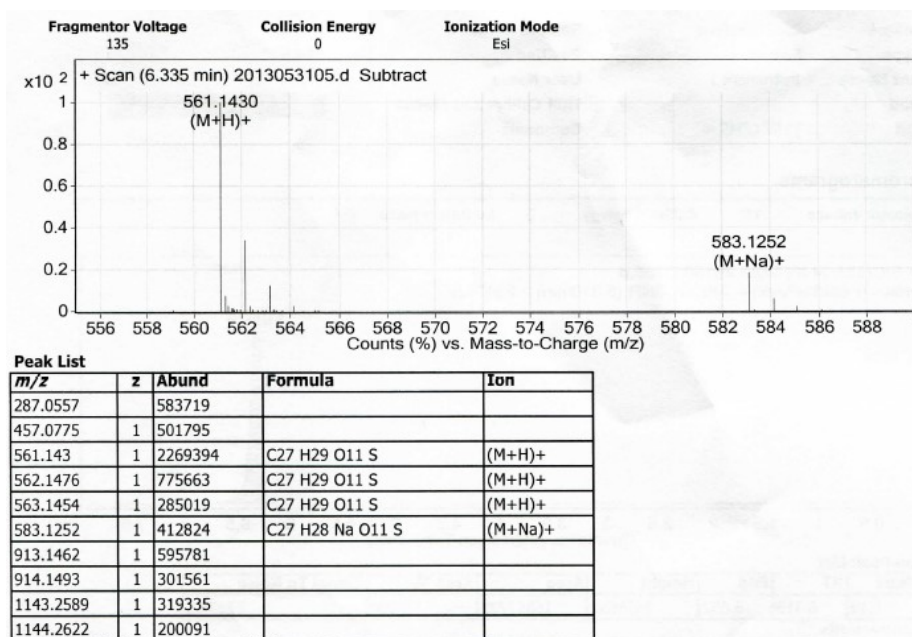

Figure S93. HRESIMS of compound **JP-31**

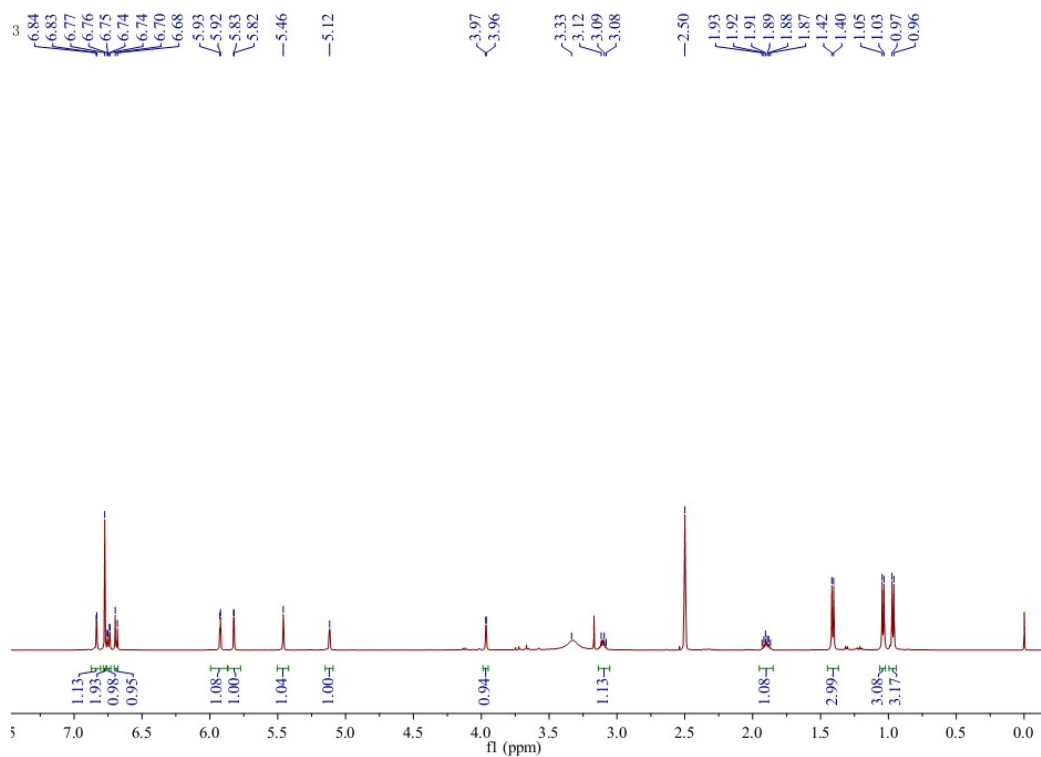

Figure S94. <sup>1</sup>H NMR of compound **JP-32** (DMSO-*d*<sub>6</sub>)



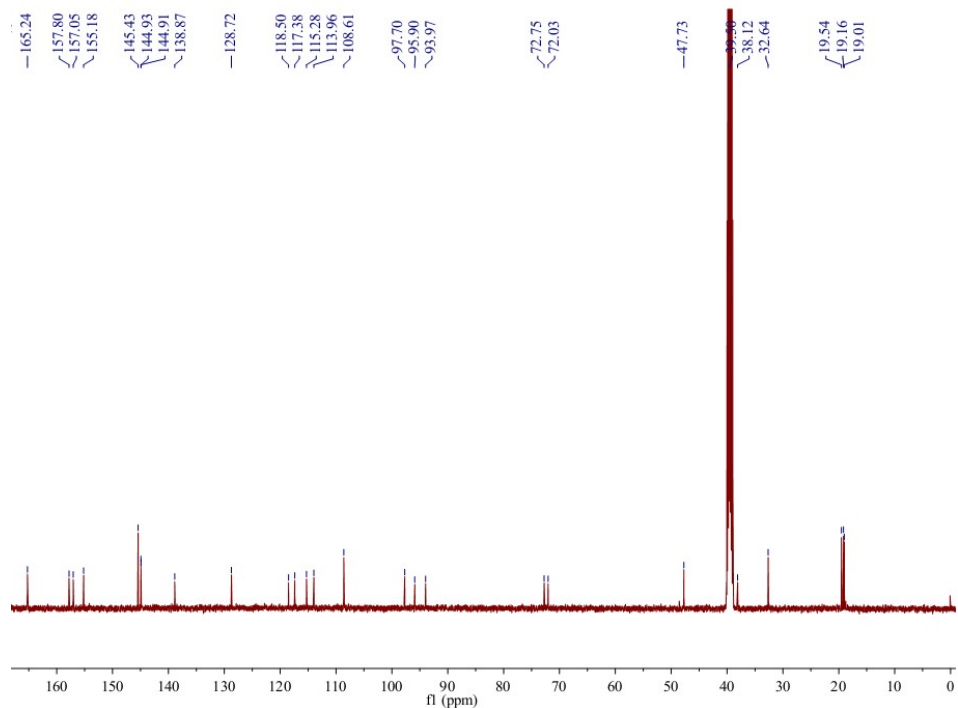

Figure S95.  $^{13}\text{C}$  NMR of compound **JP-32** ( $\text{DMSO-}d_6$ )

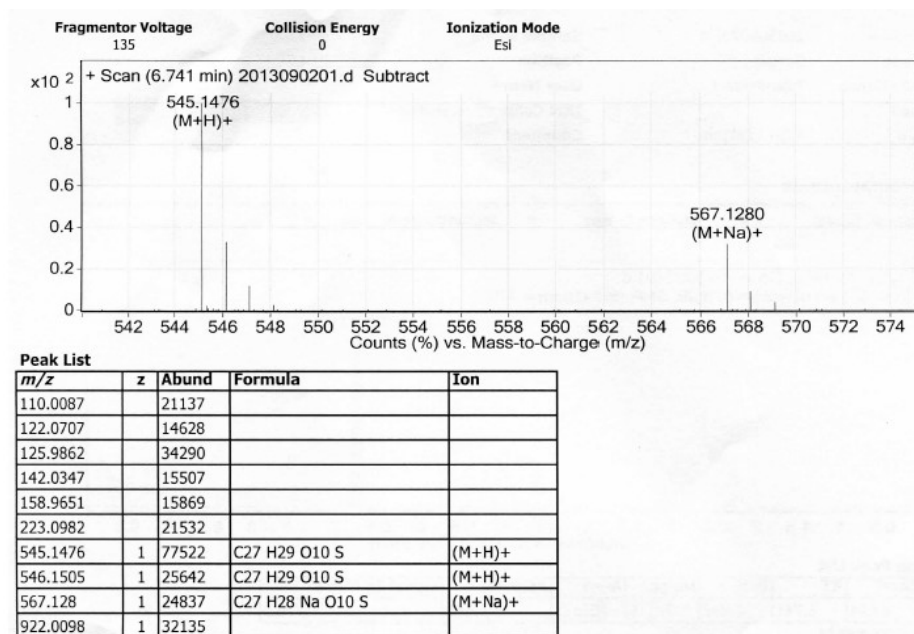

Figure S96. HRESIMS of compound **JP-32**

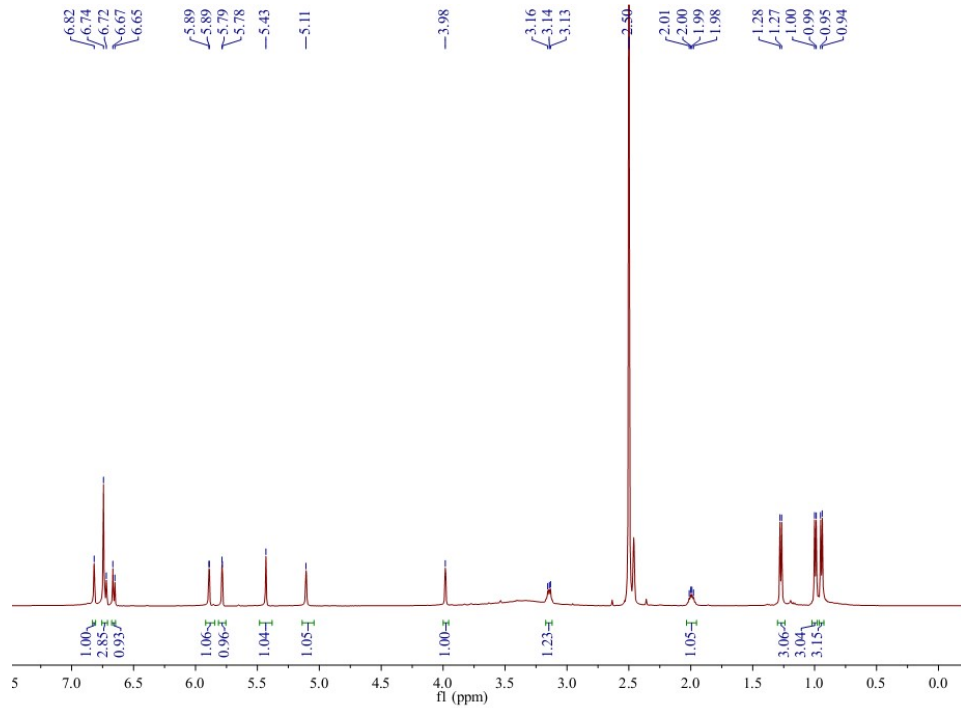

Figure S97.  $^1\text{H}$  NMR of compound **JP-33** ( $\text{DMSO-}d_6$ )

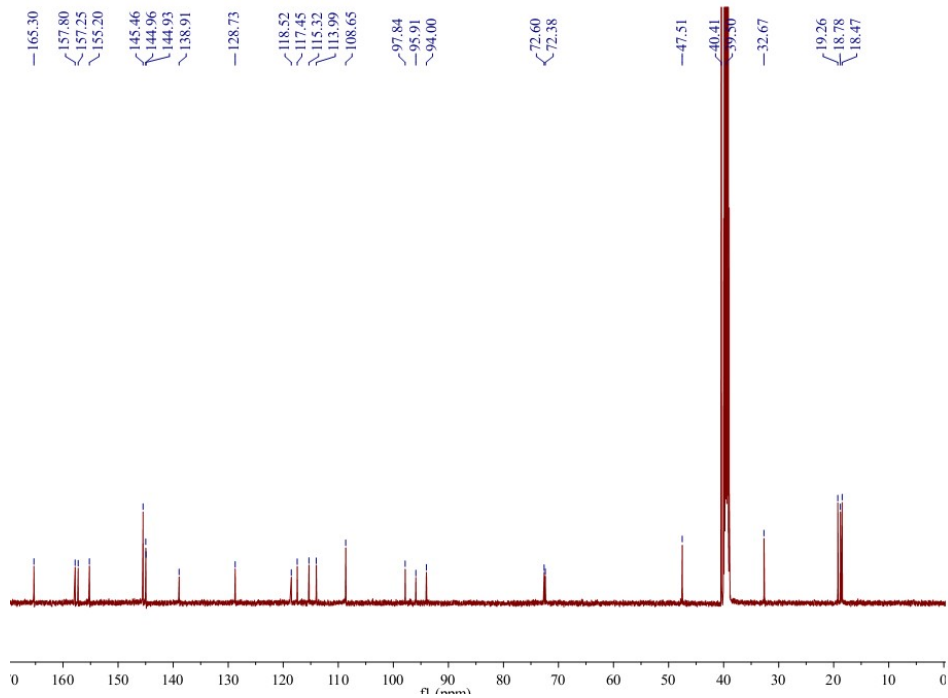

Figure S98.  $^{13}\text{C}$  NMR of compound **JP-33** ( $\text{DMSO-}d_6$ )

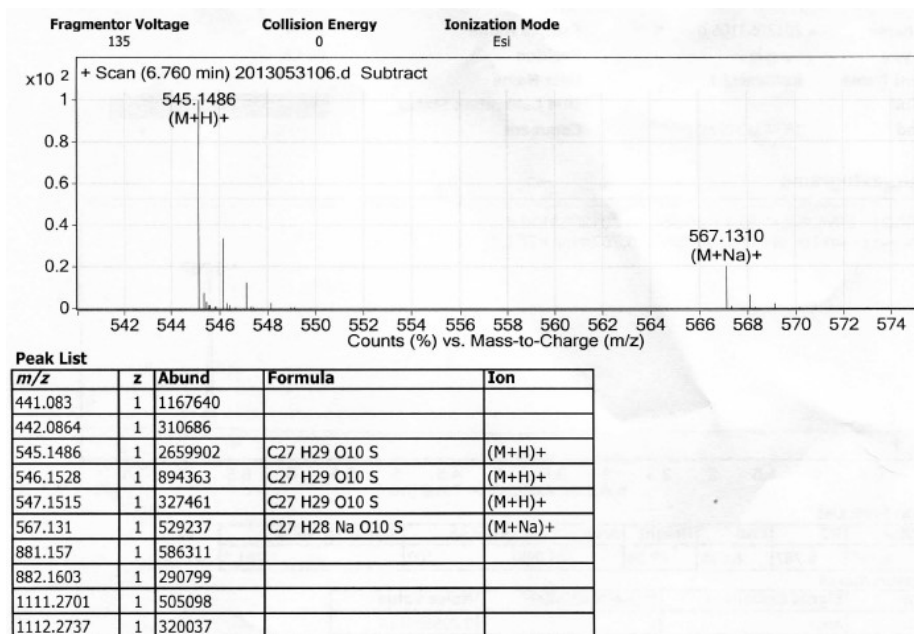

Figure S99. HRESIMS of compound **JP-33**

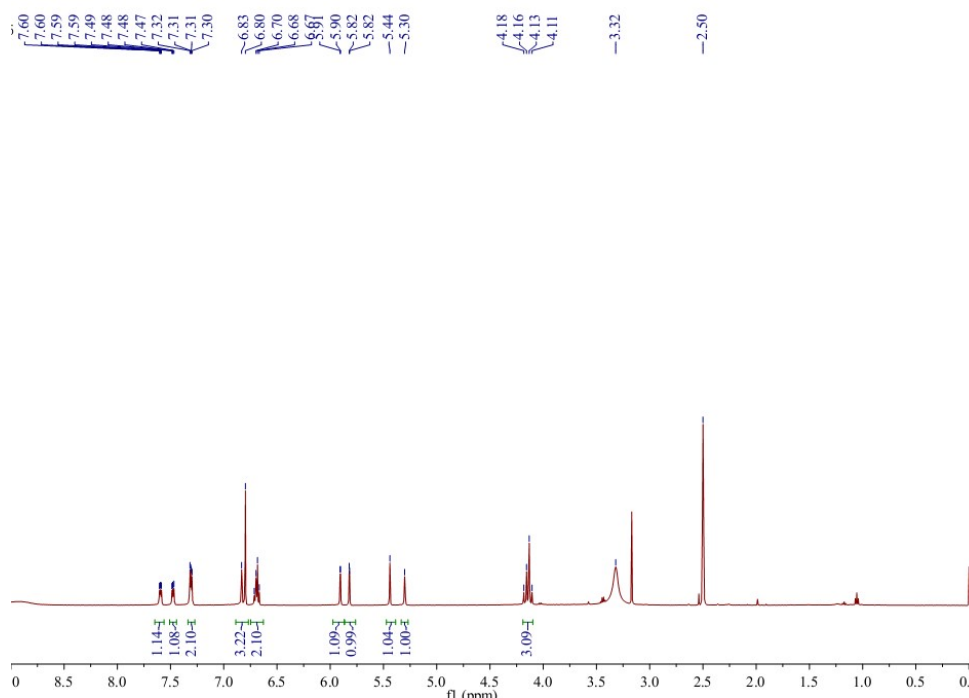

Figure S100. <sup>1</sup>H NMR of compound **JP-34** (DMSO-*d*<sub>6</sub>)

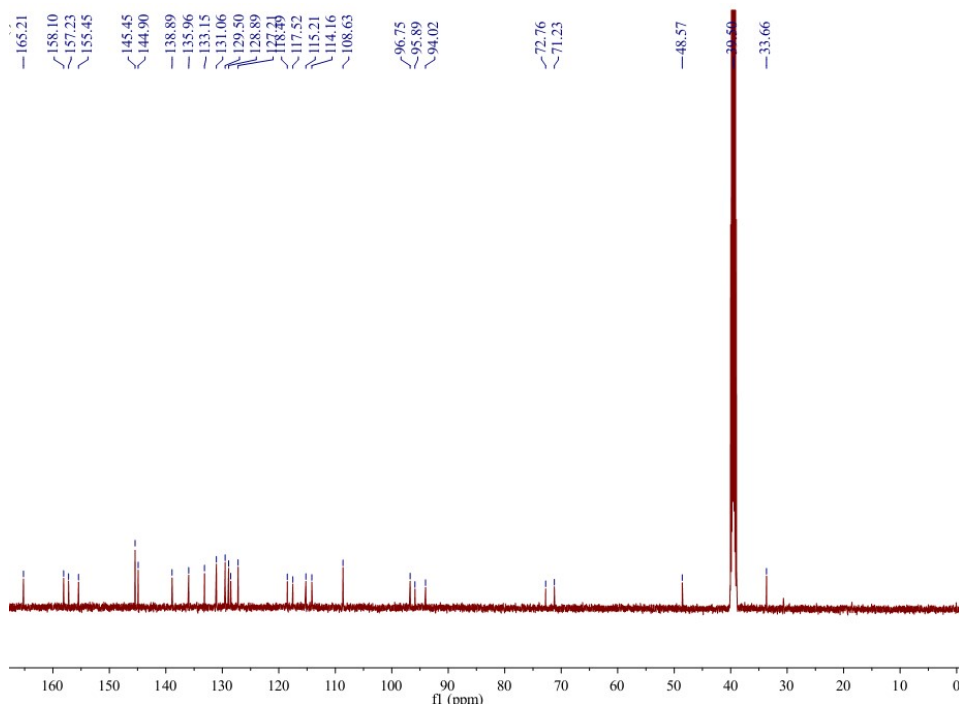

Figure S101.  $^{13}\text{C}$  NMR of compound **JP-34** ( $\text{DMSO-}d_6$ )

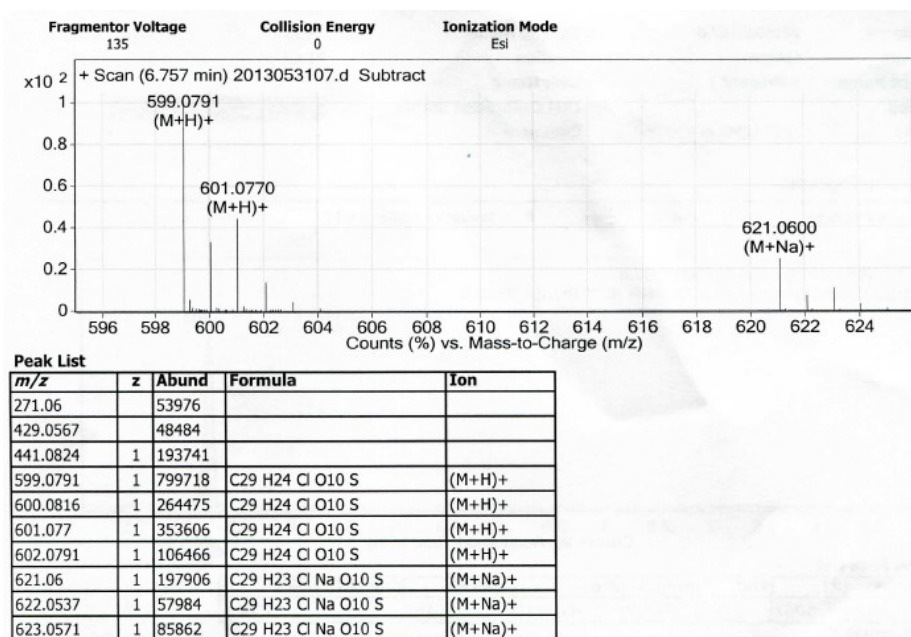

Figure S102. HRESIMS of compound **JP-34**

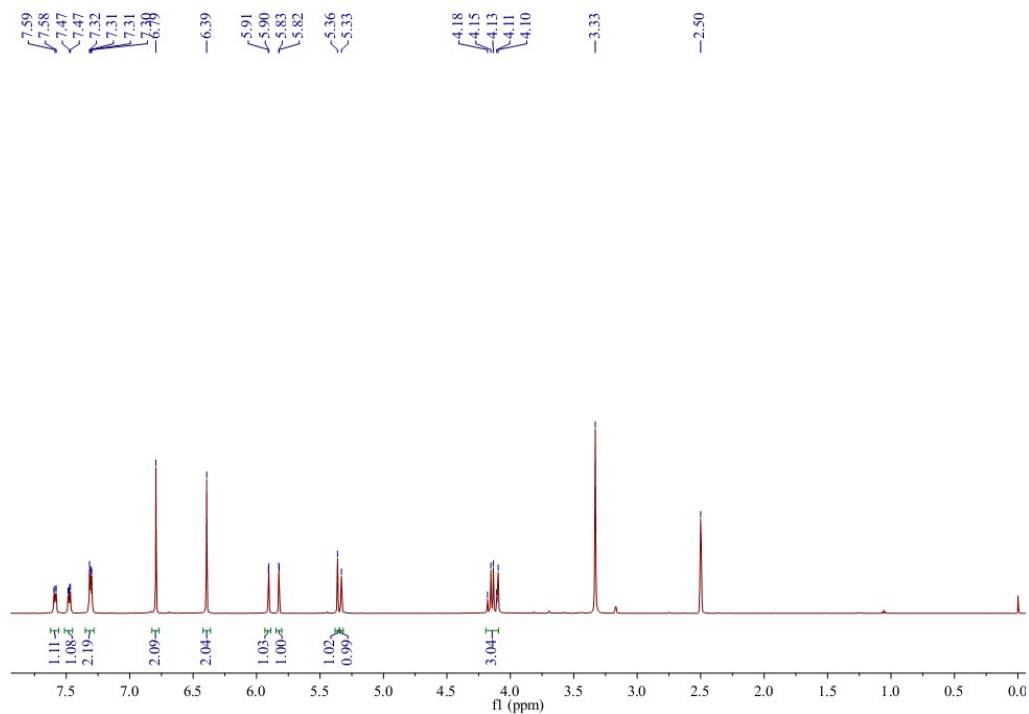

Figure S103.  $^1\text{H}$  NMR of compound **JP-35** ( $\text{DMSO-}d_6$ )

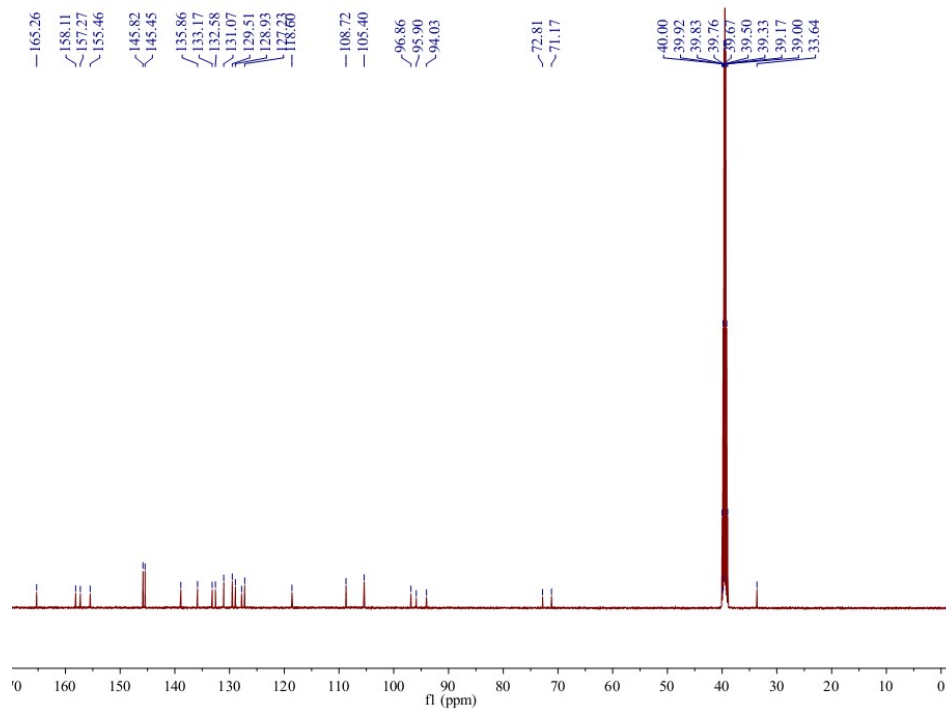

Figure S104.  $^{13}\text{C}$  NMR of compound **JP-35** ( $\text{DMSO-}d_6$ )

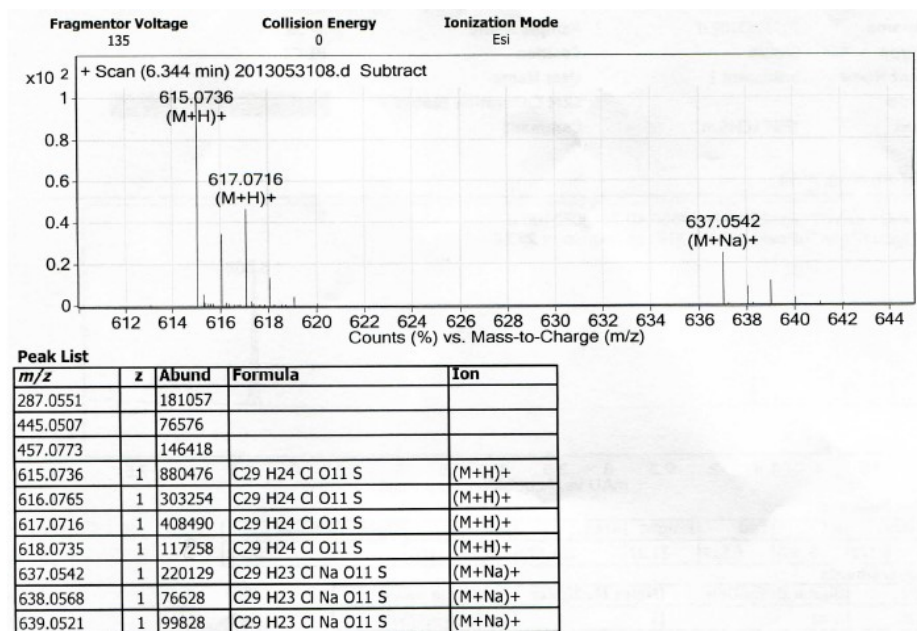

Figure S105. HRESIMS of compound **JP-35**

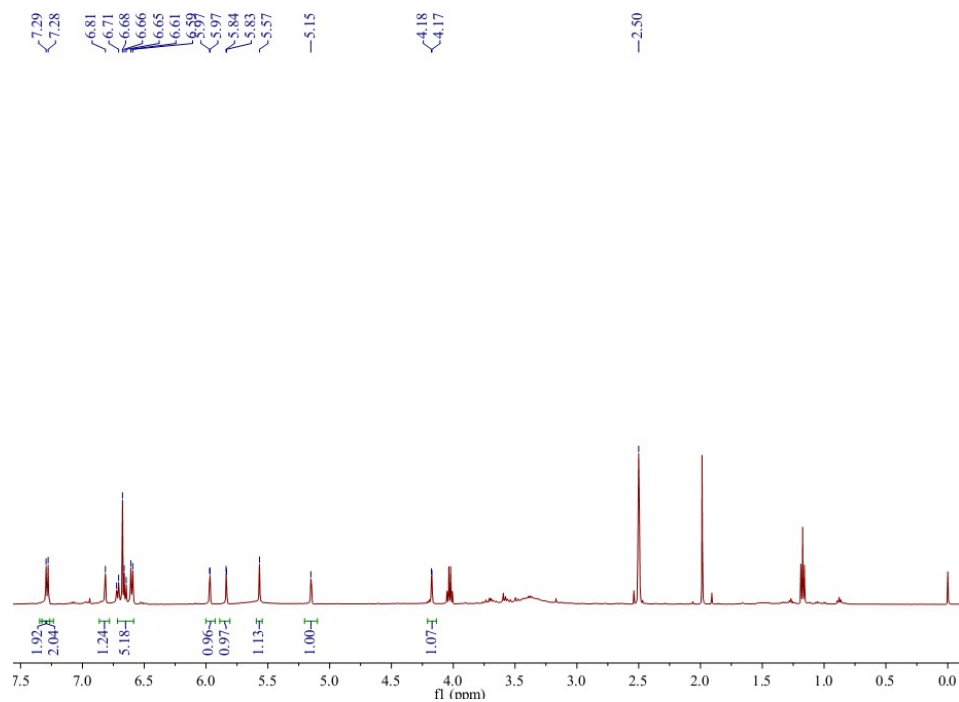

Figure S106. <sup>1</sup>H NMR of compound **JP-36** (DMSO-*d*<sub>6</sub>)

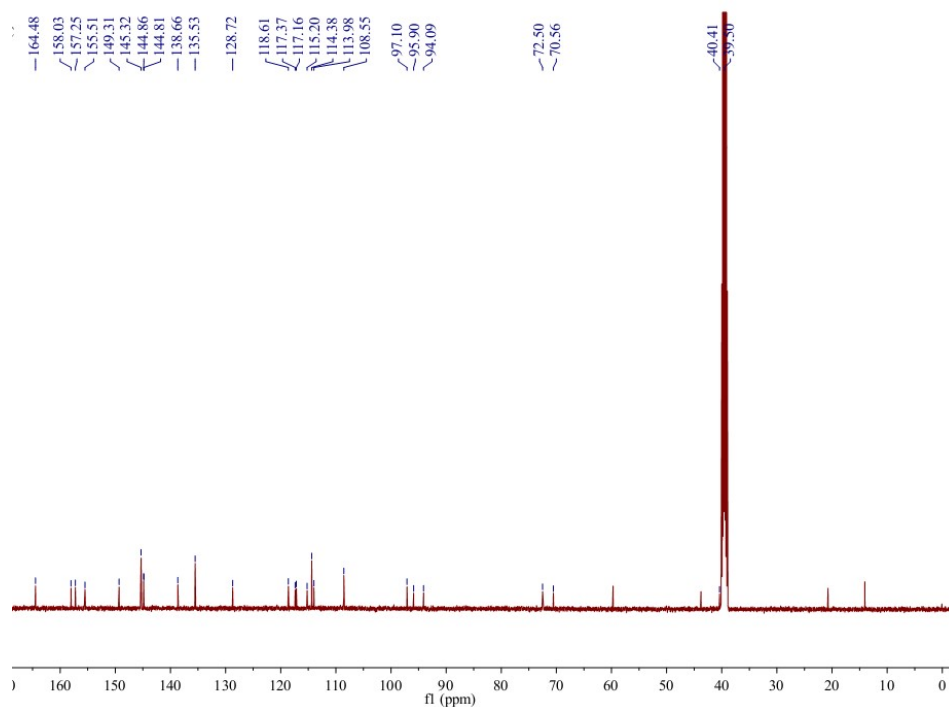

Figure S107.  $^{13}\text{C}$  NMR of compound **JP-36** ( $\text{DMSO-}d_6$ )

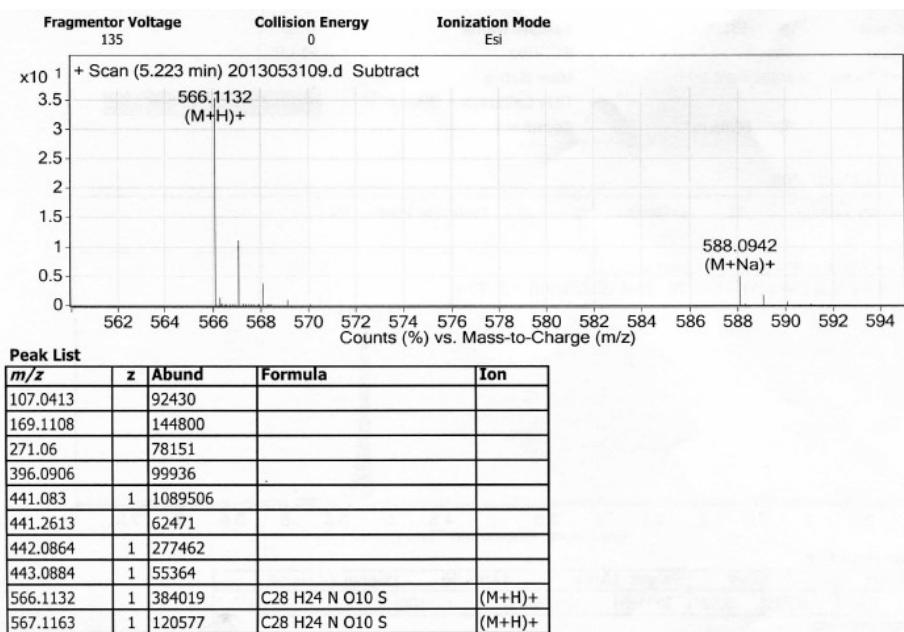

Figure S108. HRESIMS of compound **JP-36**

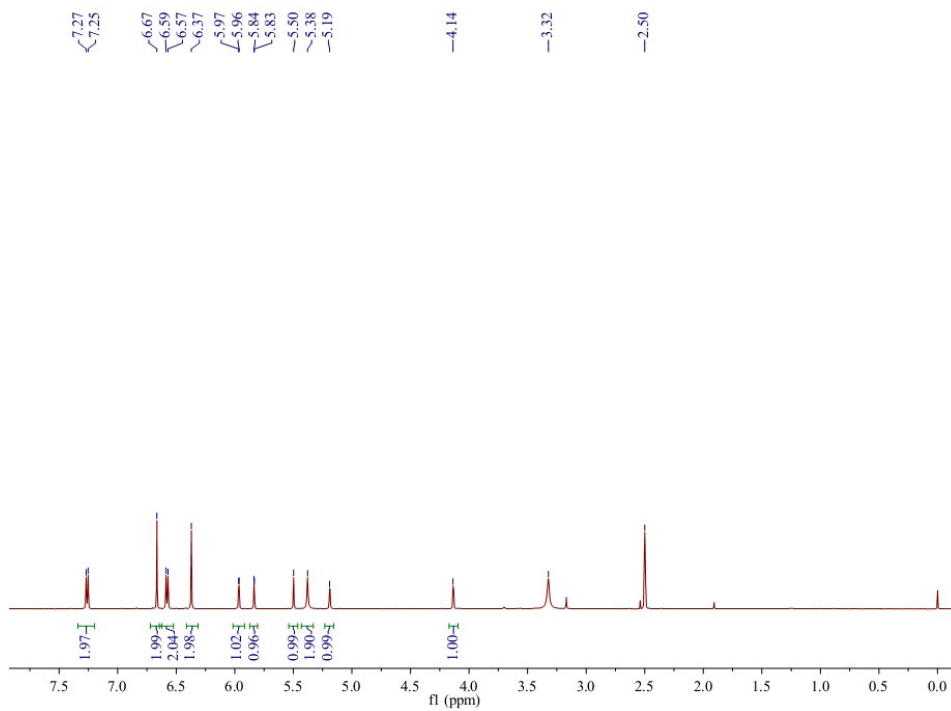

Figure S109.  $^1\text{H}$  NMR of compound **JP-37** ( $\text{DMSO-}d_6$ )

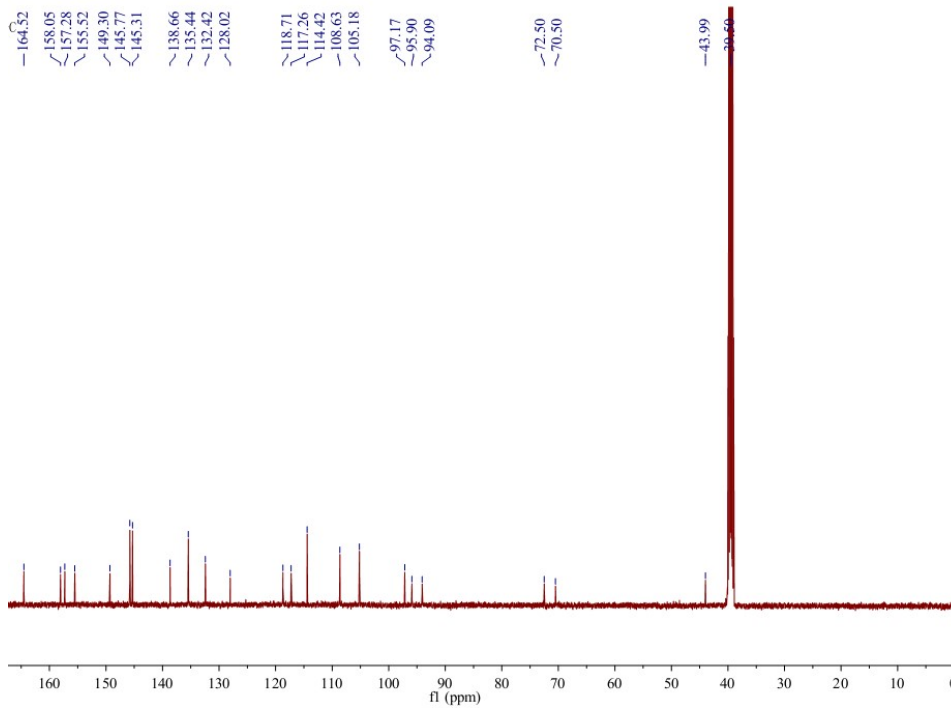

Figure S110.  $^{13}\text{C}$  NMR of compound **JP-37** ( $\text{DMSO-}d_6$ )



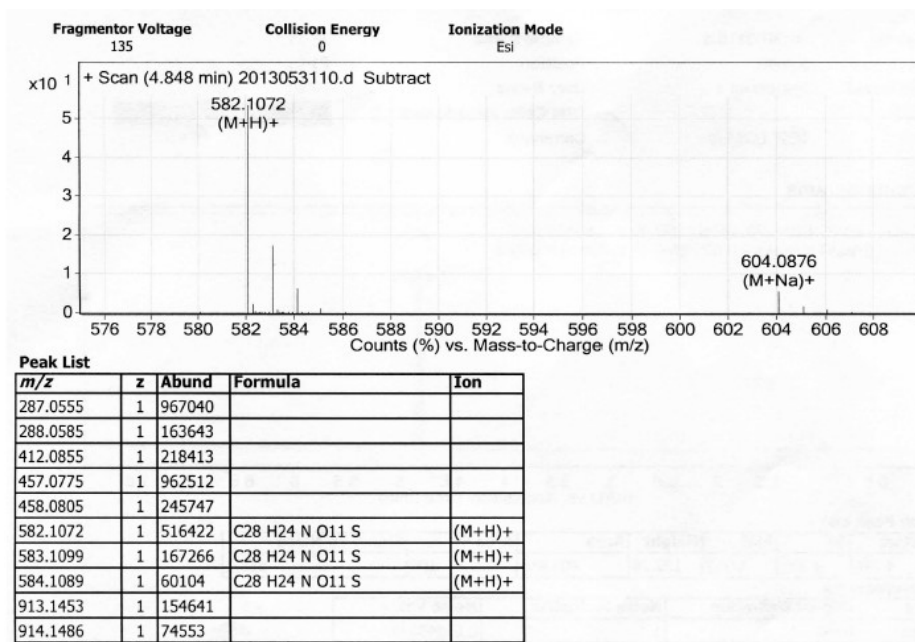

Figure S111. HRESIMS of compound **JP-37** (DMSO-*d*<sub>6</sub>)

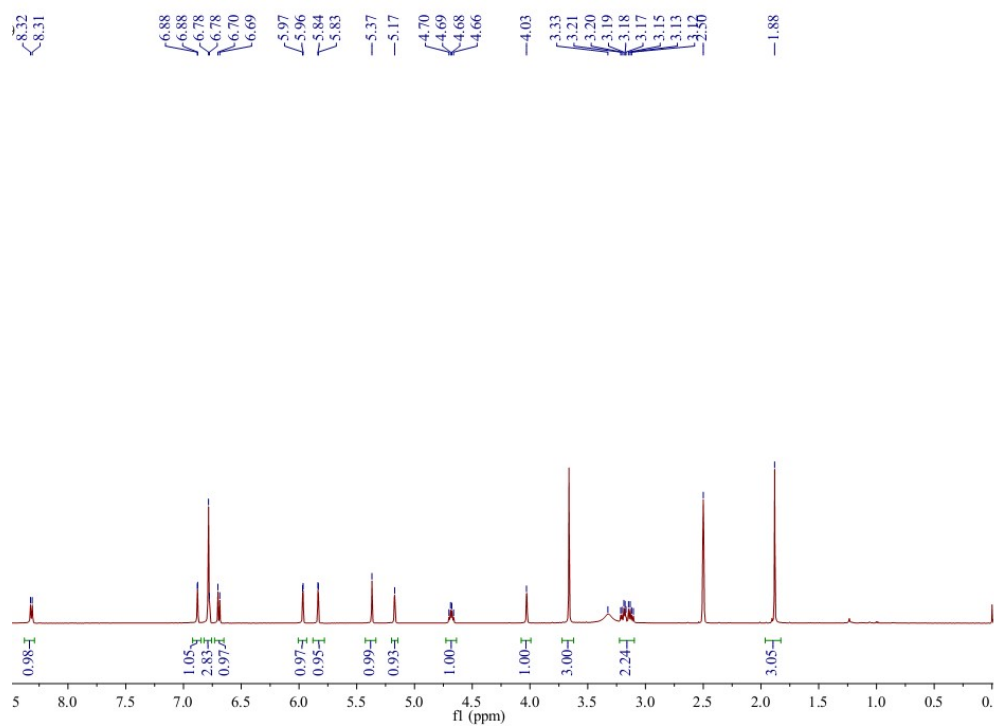

Figure S112. <sup>1</sup>H NMR of compound **JP-38** (DMSO-*d*<sub>6</sub>)

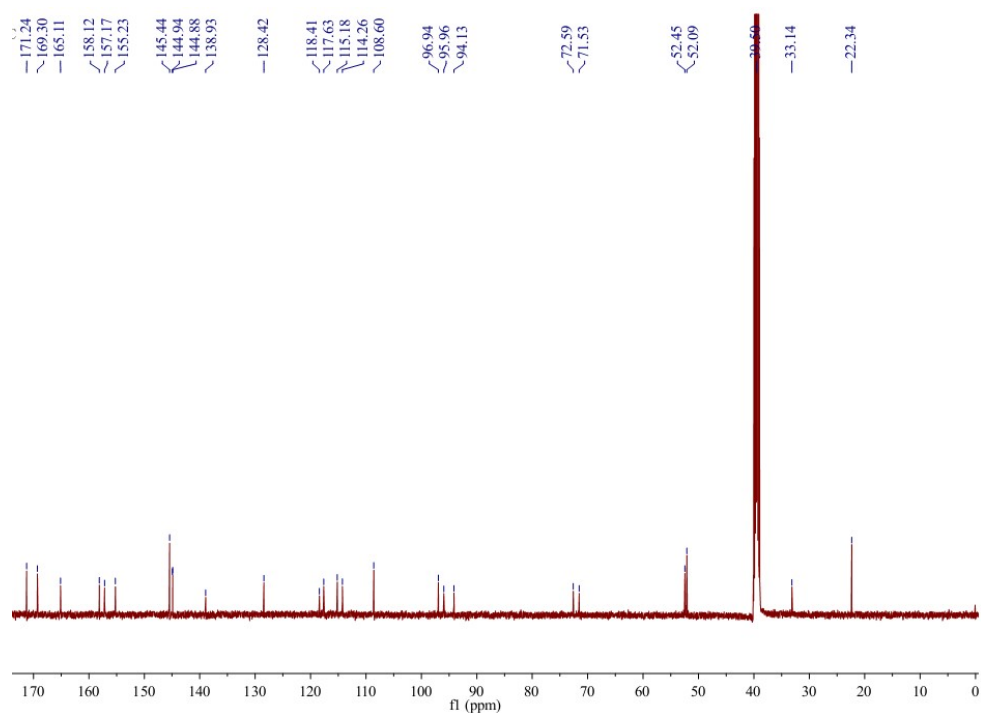

Figure S113.  $^{13}\text{C}$  NMR of compound **JP-38** ( $\text{DMSO-}d_6$ )

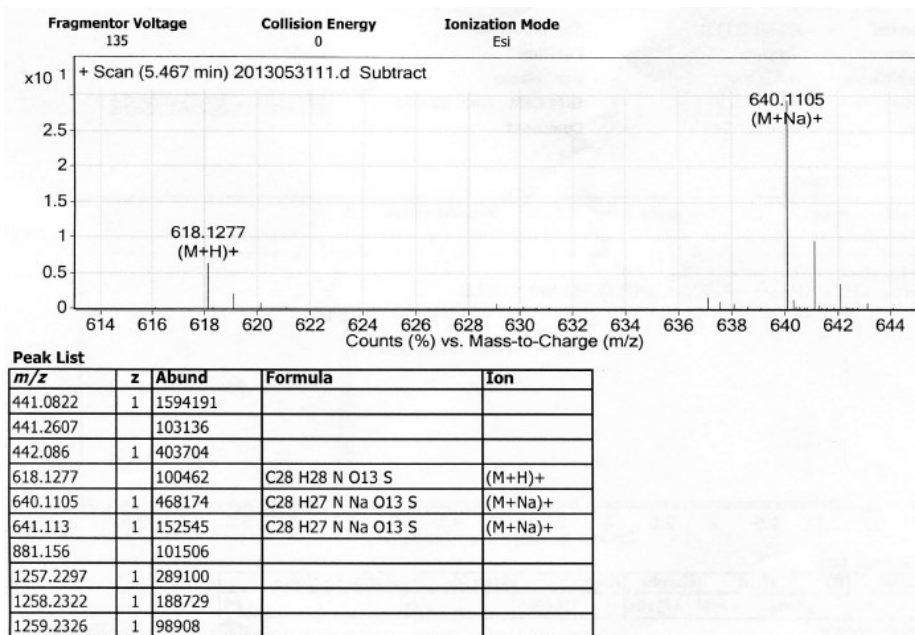

Figure S114. HRESIMS of compound **JP-38**

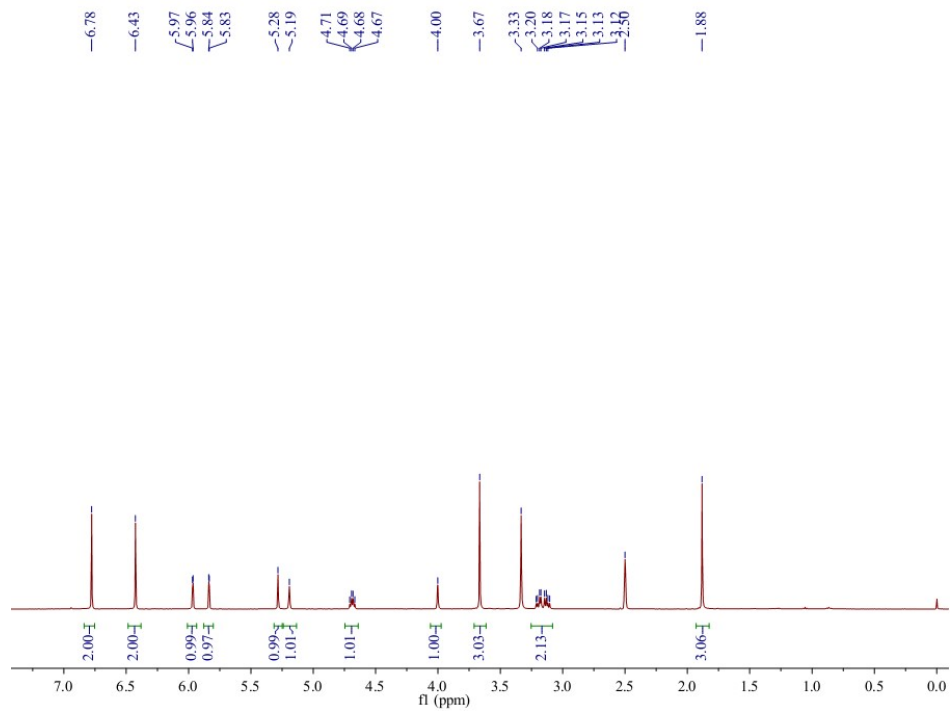

Figure S115.  $^1\text{H}$  NMR of compound **JP-39** ( $\text{DMSO-}d_6$ )

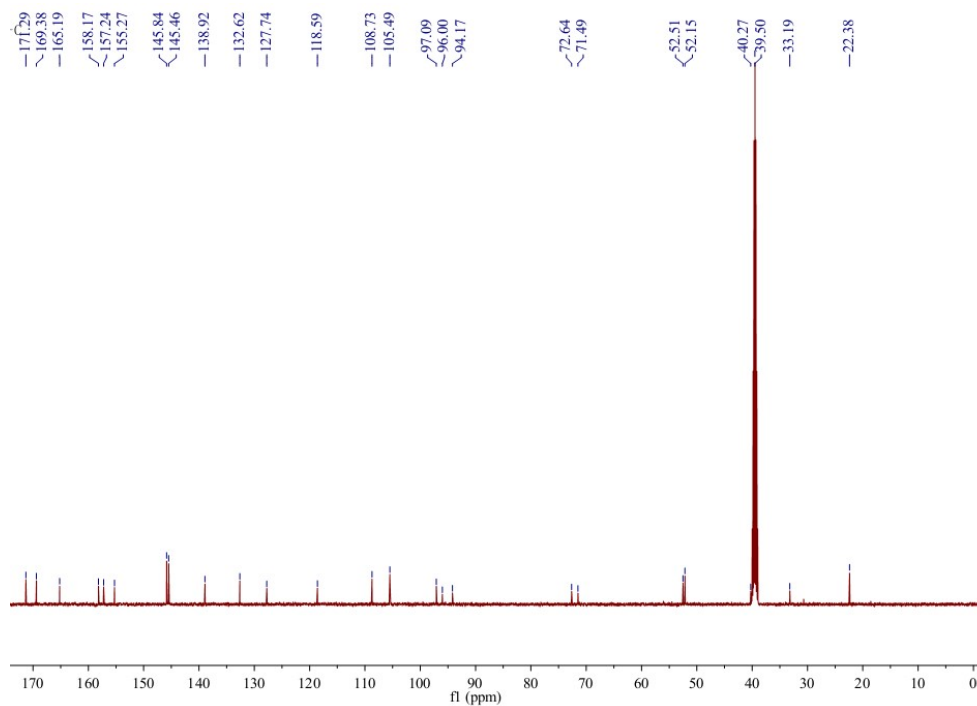

Figure S116.  $^{13}\text{C}$  NMR of compound **JP-39** ( $\text{DMSO-}d_6$ )

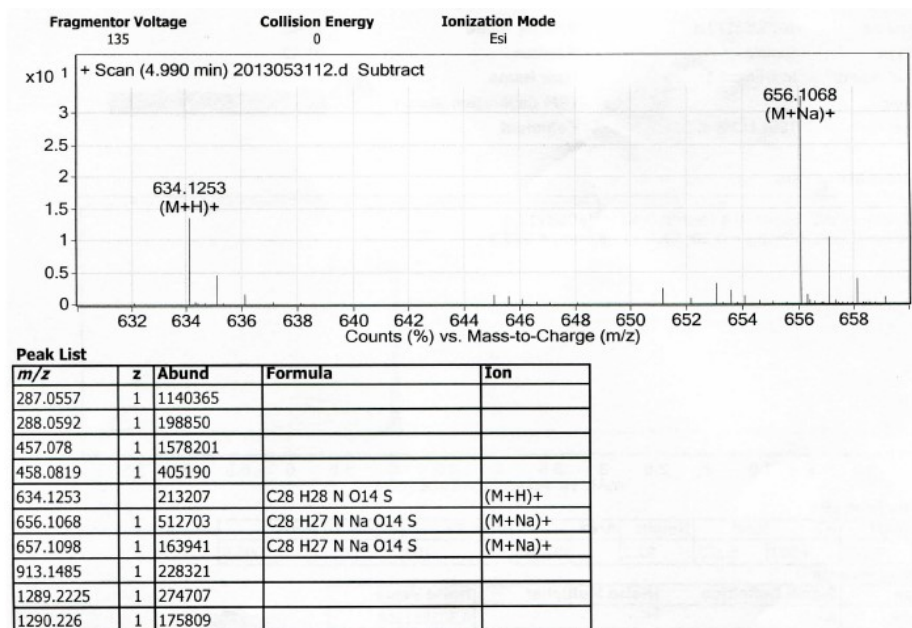

Figure S117. HRESIMS of compound **JP-39**

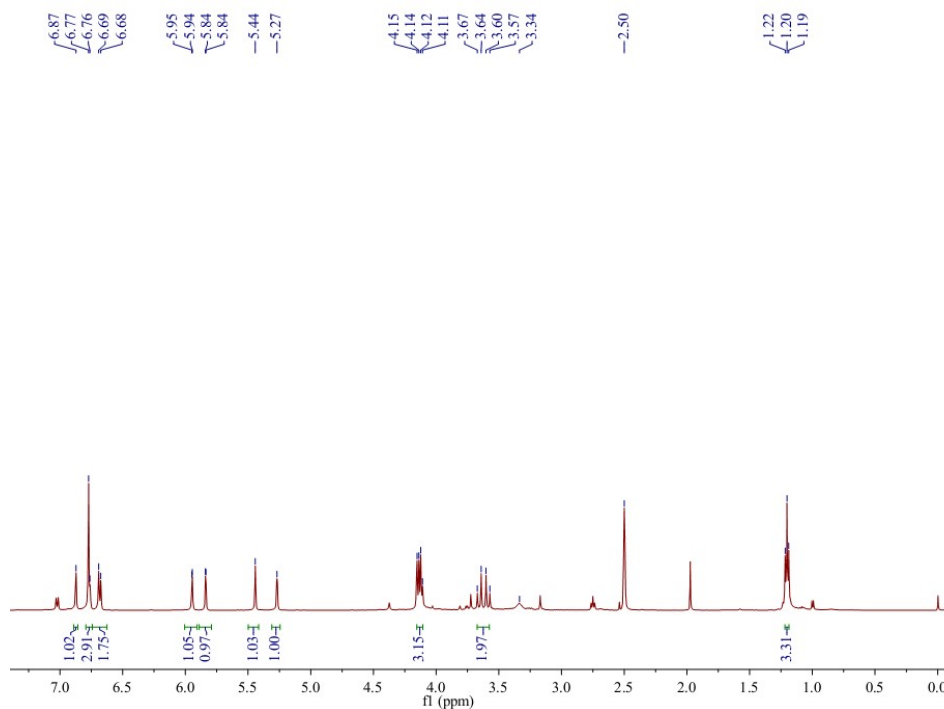

Figure S118. <sup>1</sup>H NMR of compound **JP-40** (DMSO-*d*<sub>6</sub>)

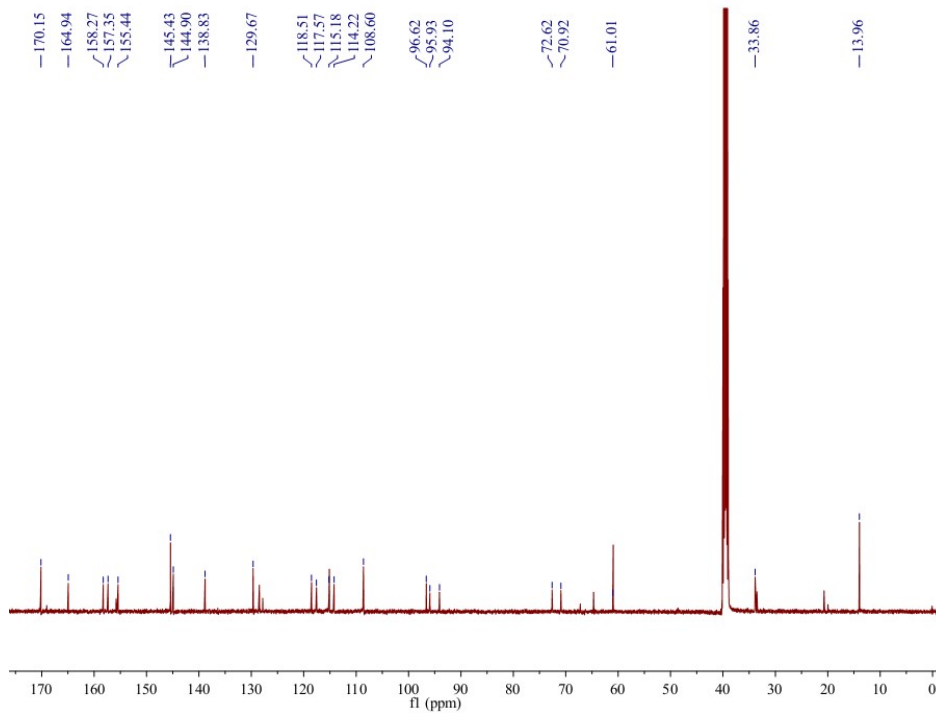

Figure S119.  $^{13}\text{C}$  NMR of compound **JP-40** ( $\text{DMSO-}d_6$ )

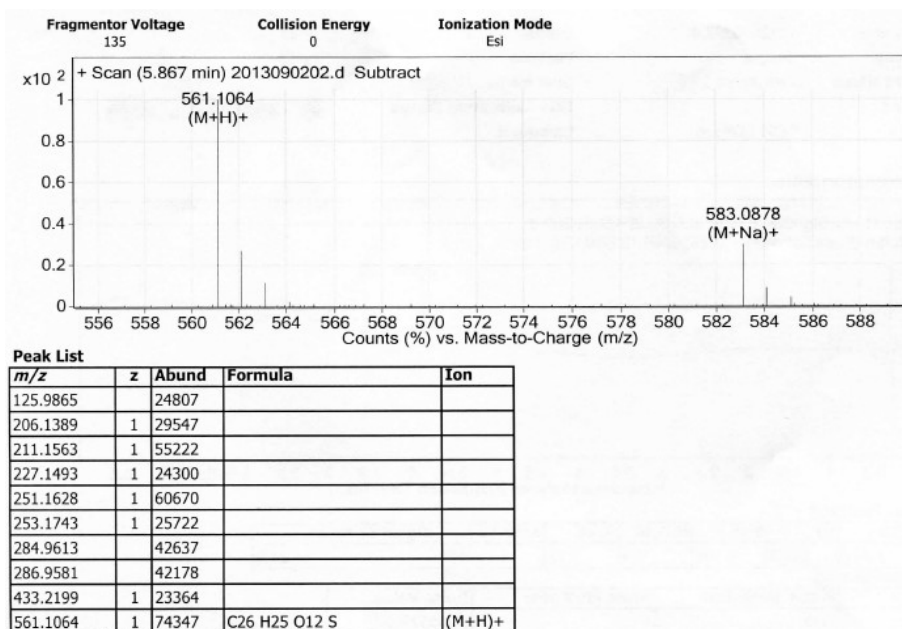

Figure S120. HRESIMS of compound **JP-40**

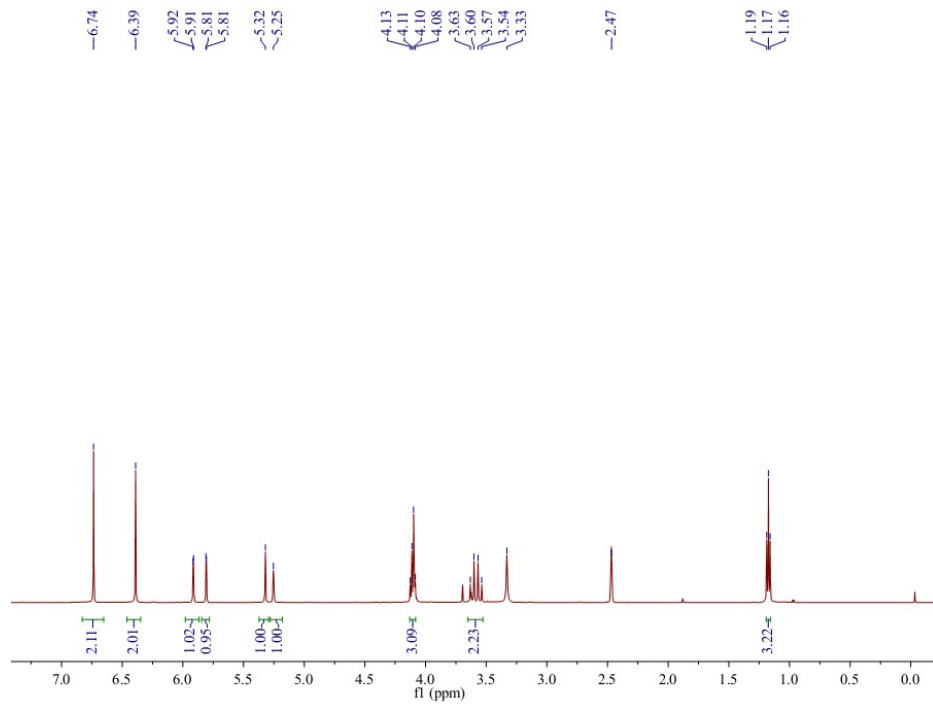

Figure S121.  $^1\text{H}$  NMR of compound **JP-41** ( $\text{DMSO-}d_6$ )

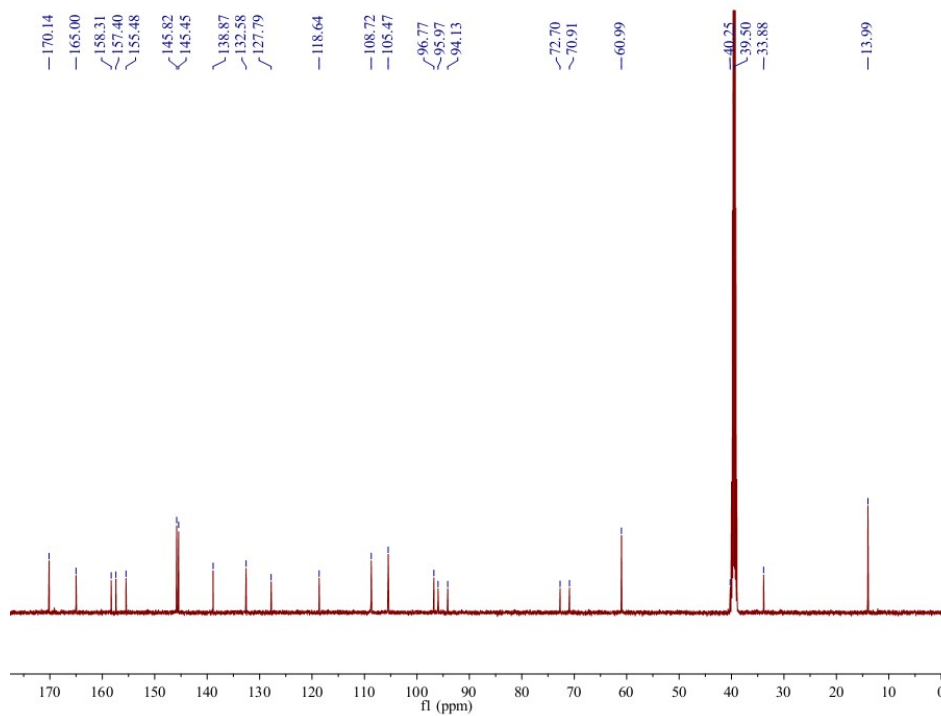

Figure S122.  $^{13}\text{C}$  NMR of compound **JP-41** ( $\text{DMSO-}d_6$ )

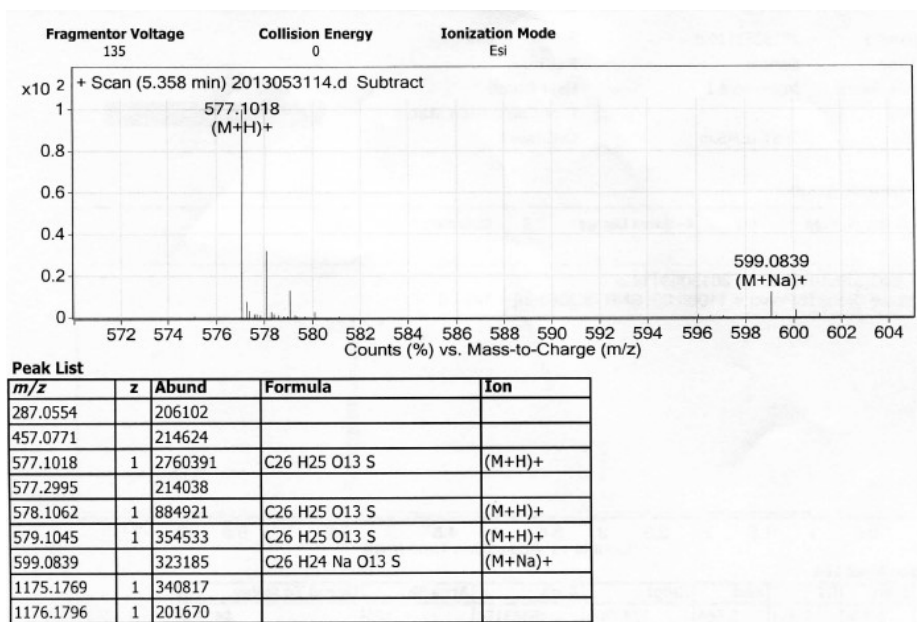

Figure S123. HRESIMS of compound **JP-41**

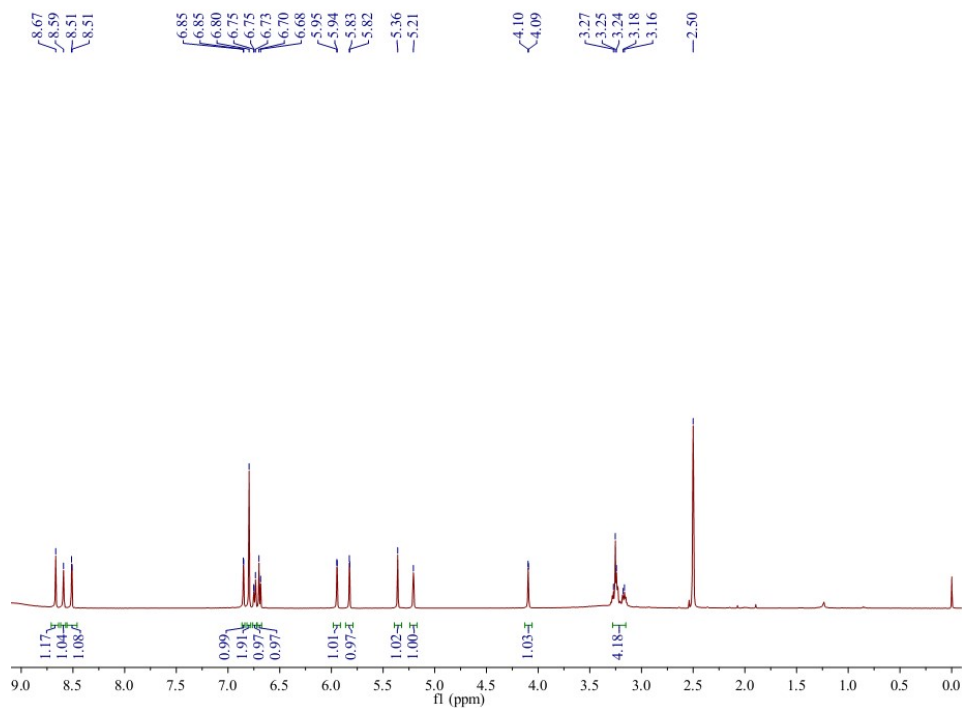

Figure S124. <sup>1</sup>H NMR of compound **JP-42** (DMSO-*d*<sub>6</sub>)

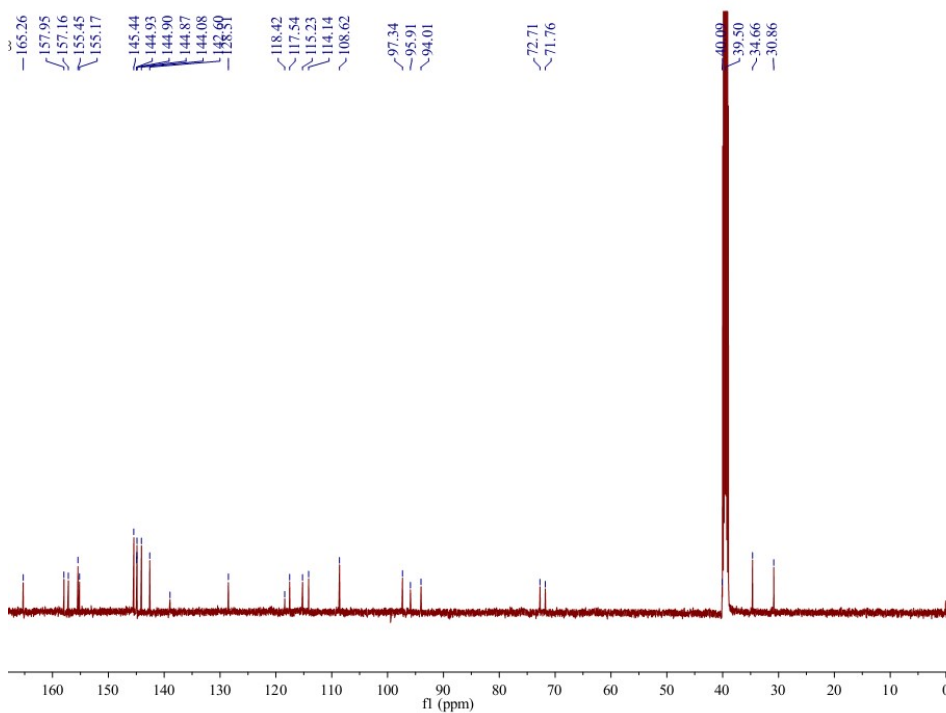

Figure S125.  $^{13}\text{C}$  NMR of compound **JP-42** ( $\text{DMSO-}d_6$ )

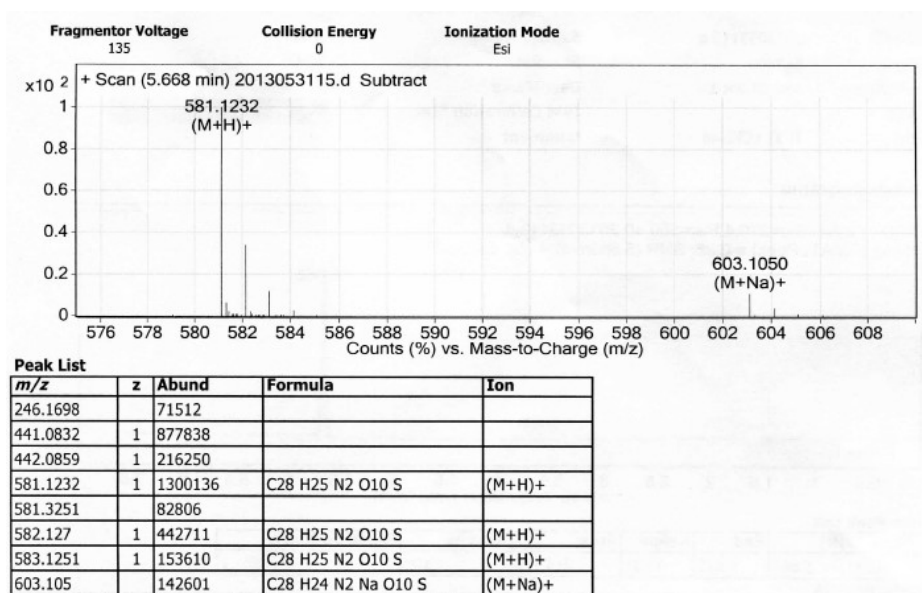

Figure S126. HRESIMS of compound **JP-42**



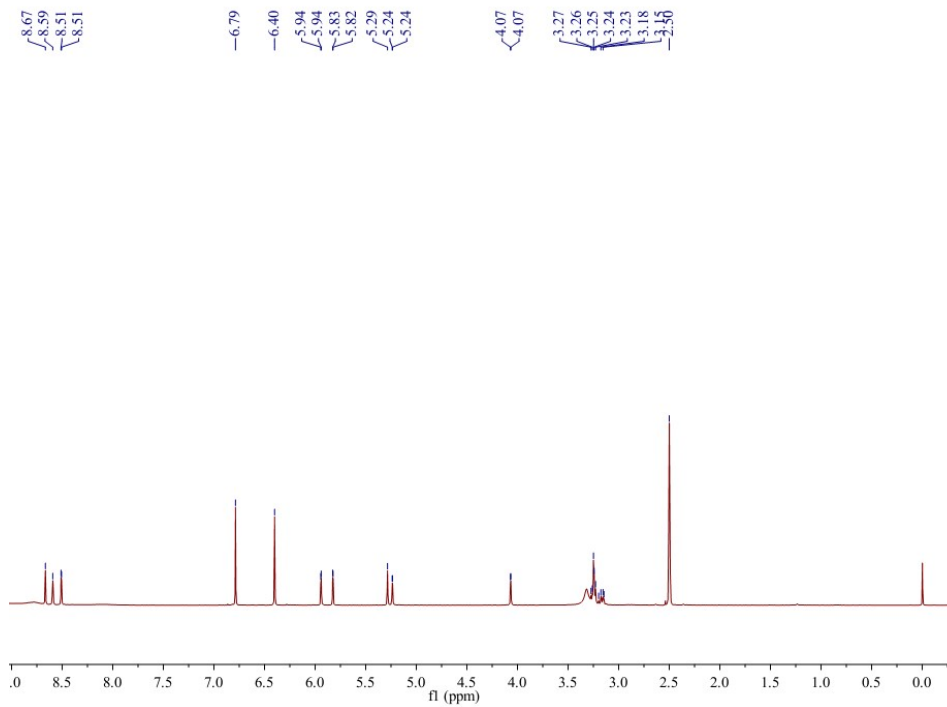

Figure S127.  $^1\text{H}$  NMR of compound **JP-43** ( $\text{DMSO-}d_6$ )

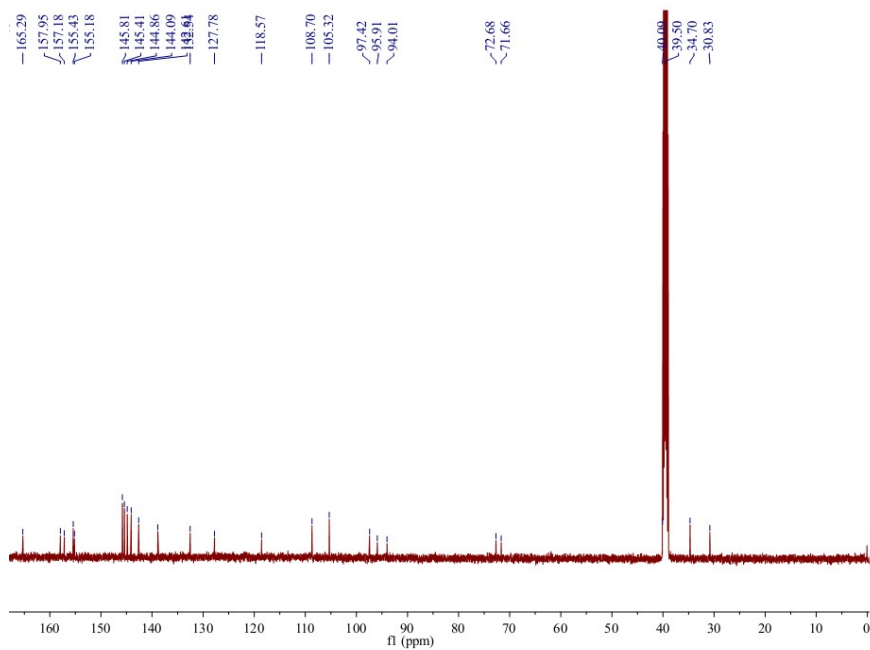

Figure S128.  $^{13}\text{C}$  NMR of compound **JP-43** ( $\text{DMSO-}d_6$ )

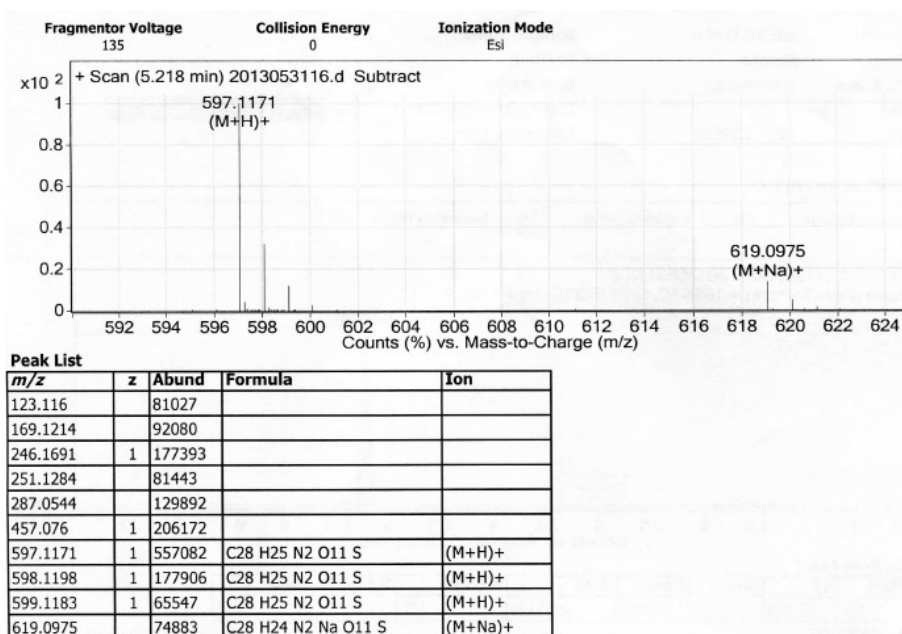

Figure S129. HRESIMS of compound **JP-43**

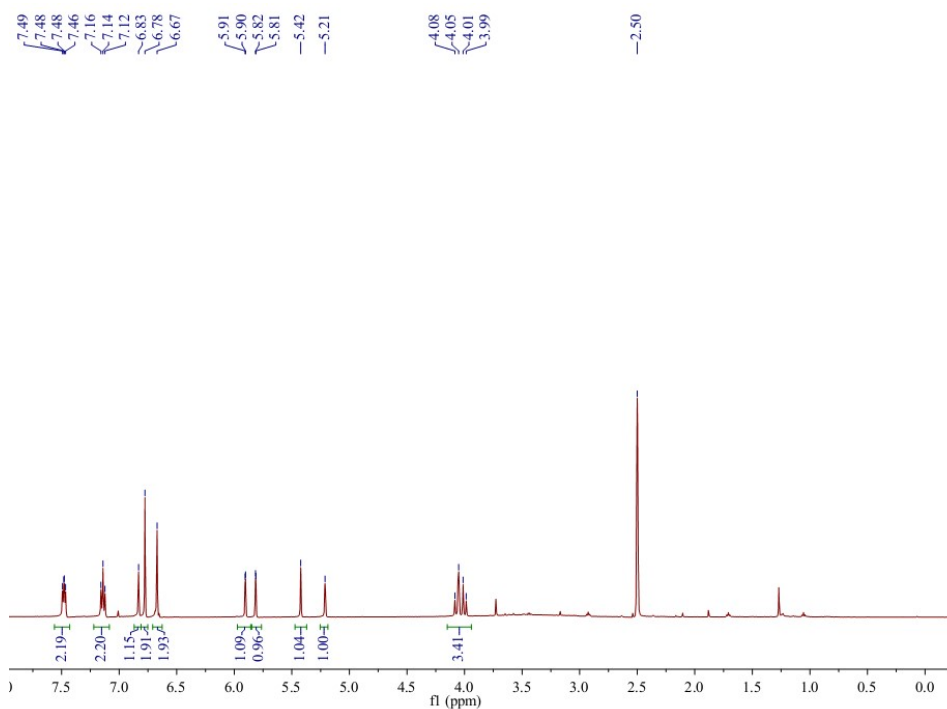

Figure S130. <sup>1</sup>H NMR of compound **JP-44** (DMSO-*d*<sub>6</sub>)

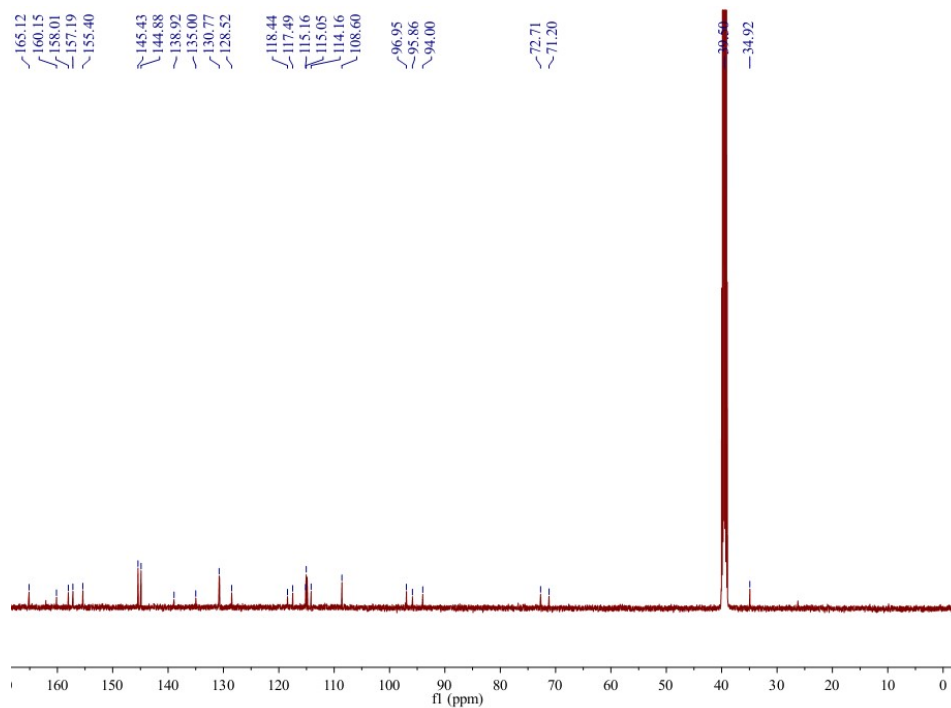

Figure S131.  $^{13}\text{C}$  NMR of compound **JP-44** ( $\text{DMSO-}d_6$ )

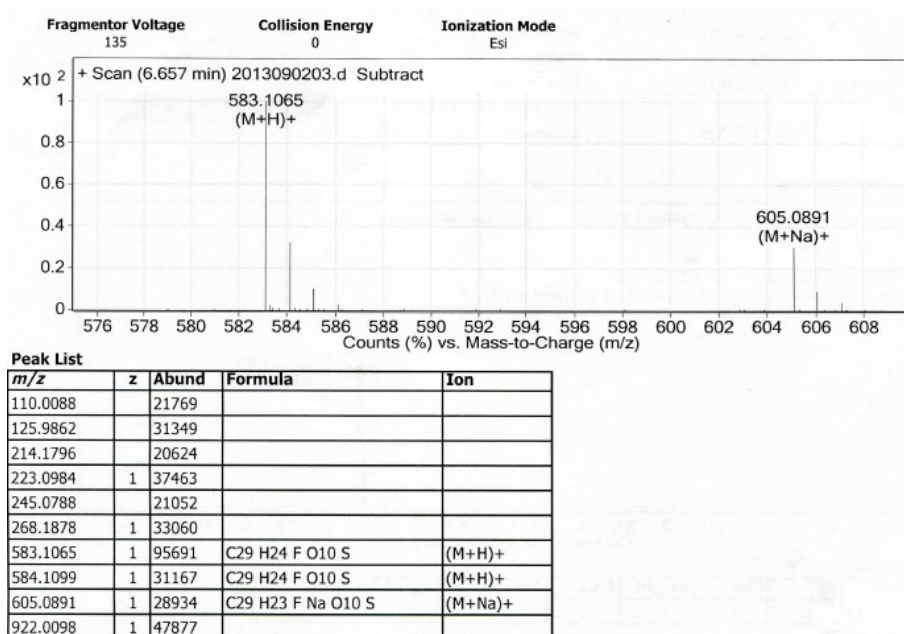

Figure S132. HRESIMS of compound **JP-44**

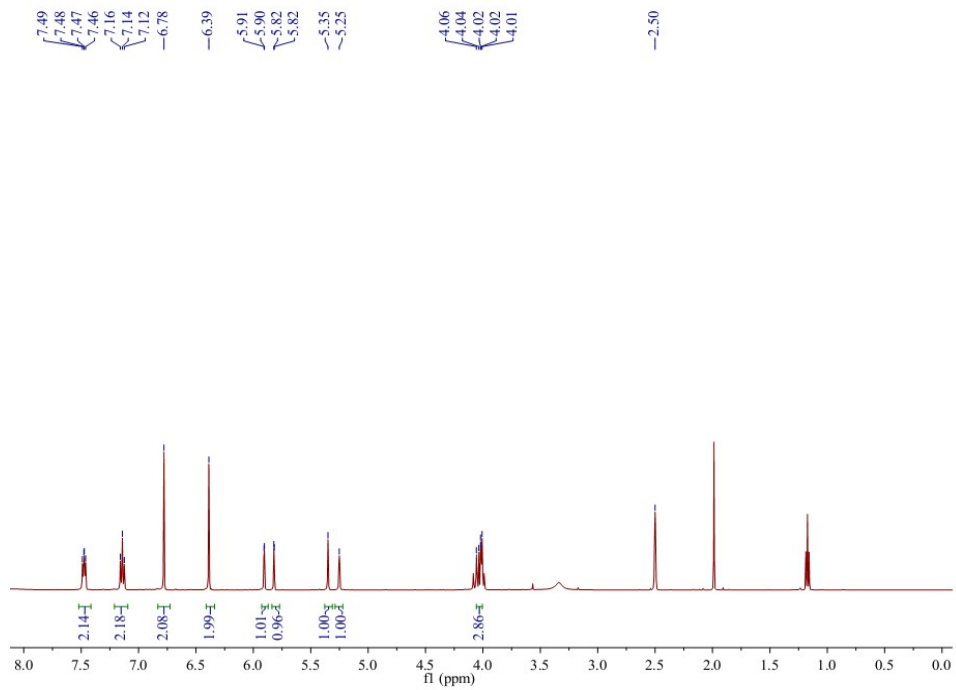

Figure S133.  $^1\text{H}$  NMR of compound **JP-45** ( $\text{DMSO-}d_6$ )

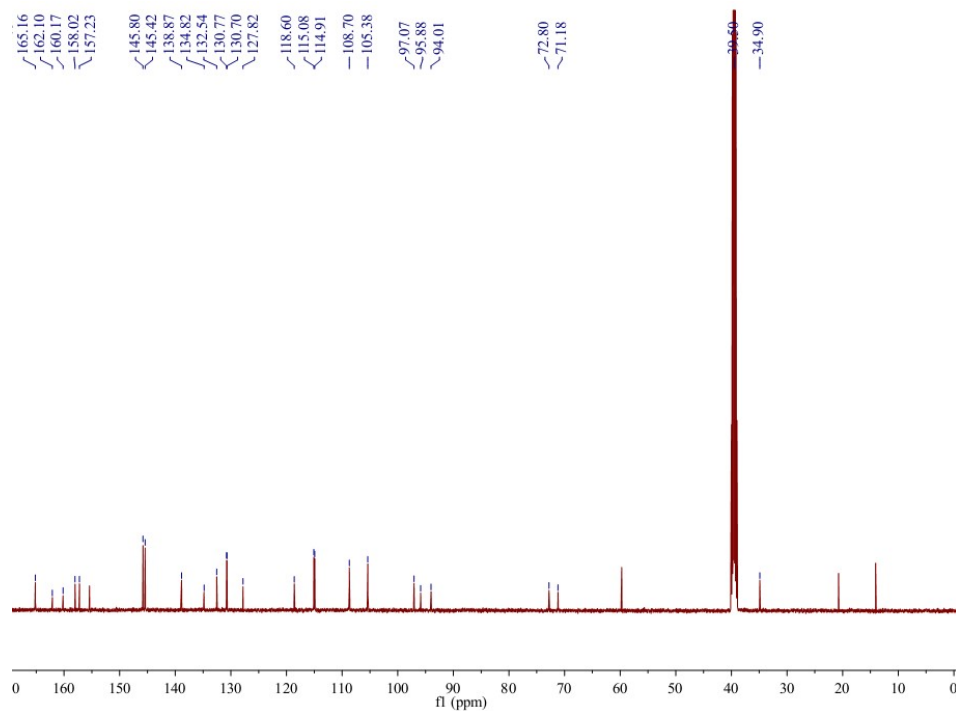

Figure S134.  $^{13}\text{C}$  NMR of compound **JP-45** ( $\text{DMSO-}d_6$ )

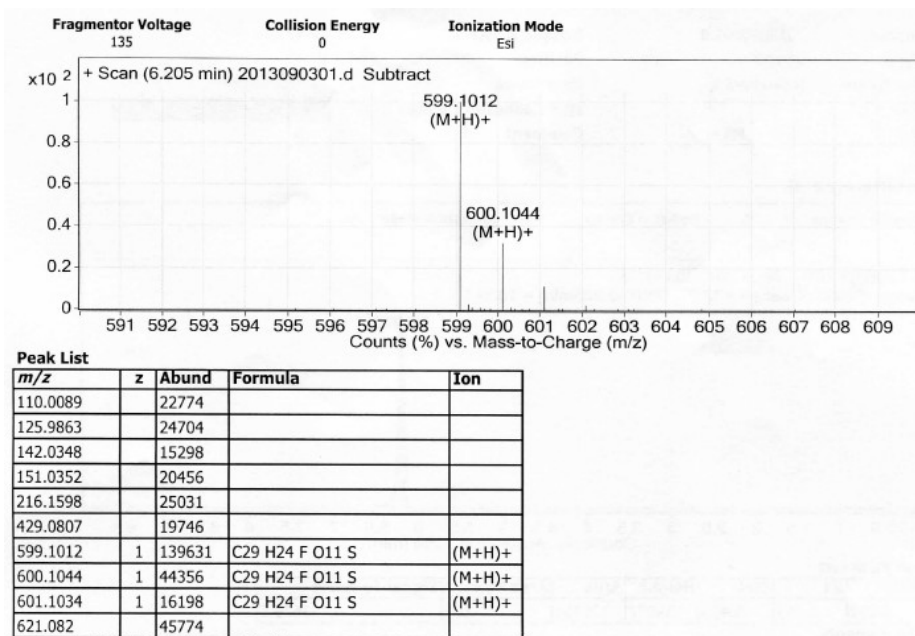

Figure S135. HRESIMS of compound **JP-45**

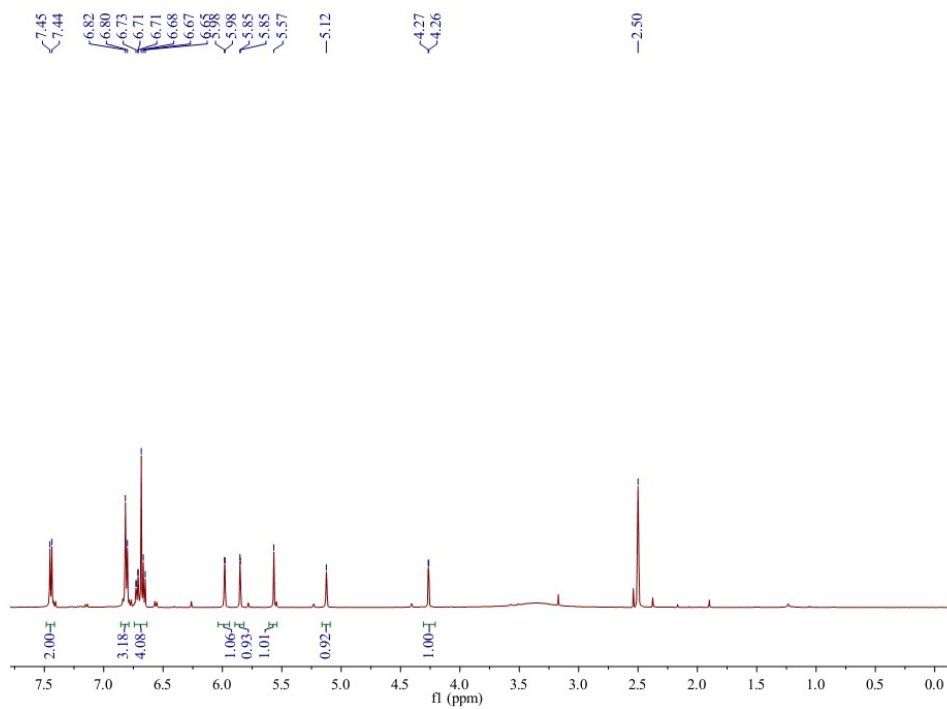

Figure S136. <sup>1</sup>H NMR of compound **JP-46** (DMSO-*d*<sub>6</sub>)

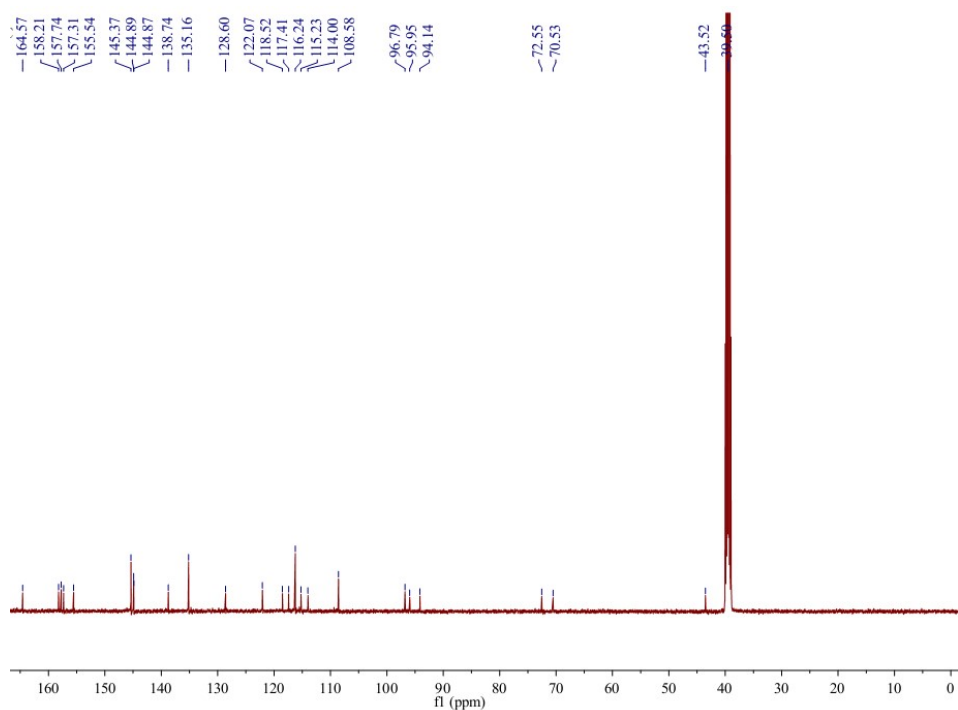

Figure S137.  $^{13}\text{C}$  NMR of compound **JP-46** ( $\text{DMSO-}d_6$ )

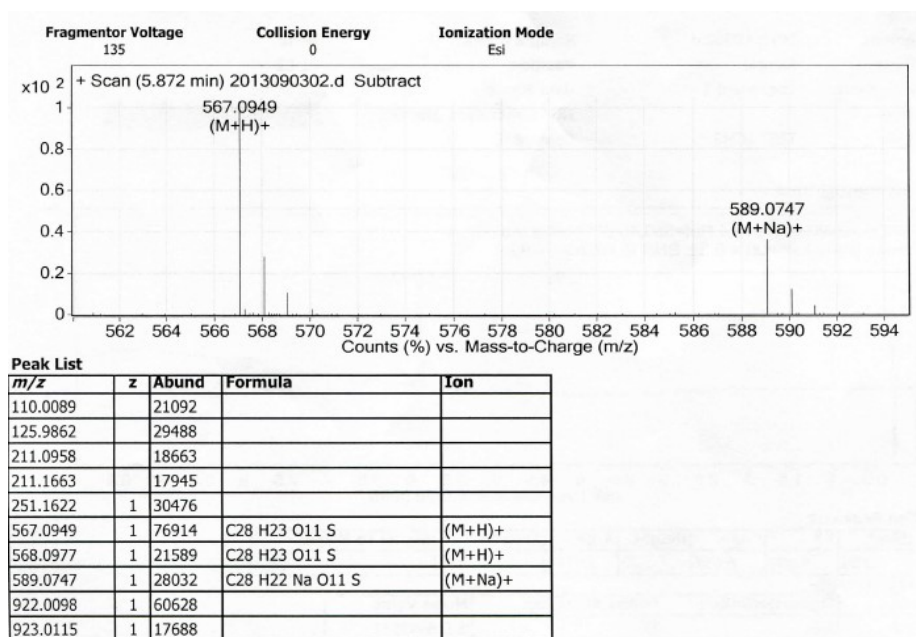

Figure S138. HRMSIMS of compound **JP-46**

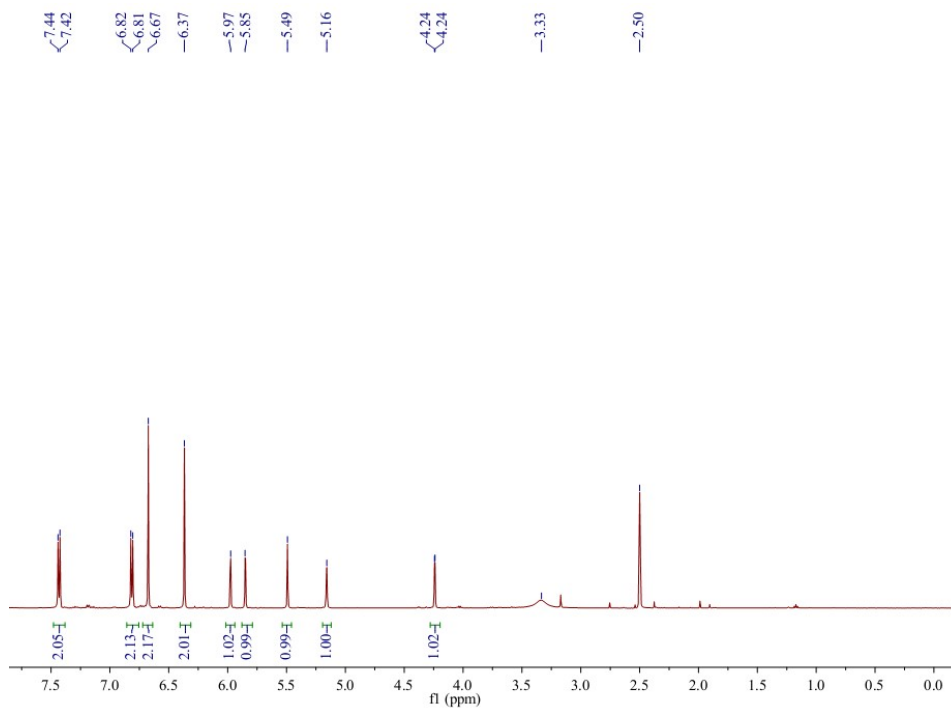

Figure S139.  $^1\text{H}$  NMR of compound **JP-47** ( $\text{DMSO-}d_6$ )

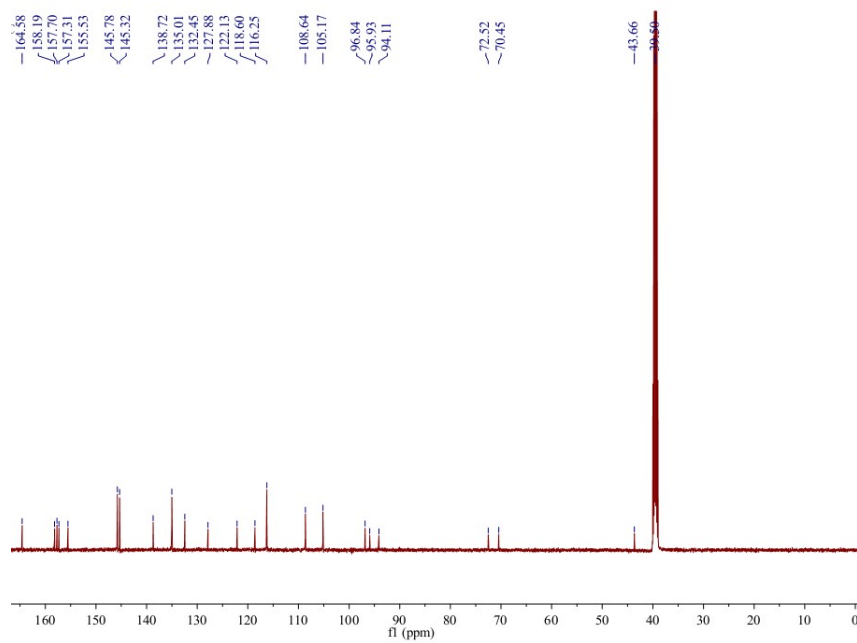

Figure S140.  $^{13}\text{C}$  NMR of compound **JP-47** ( $\text{DMSO-}d_6$ )

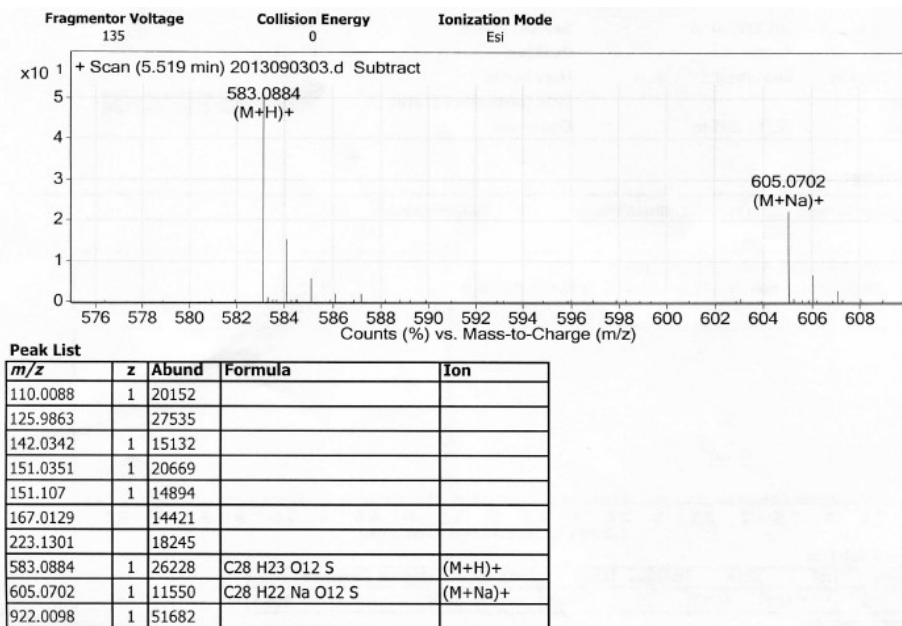

Figure S141. HRESIMS of compound **JP-47**

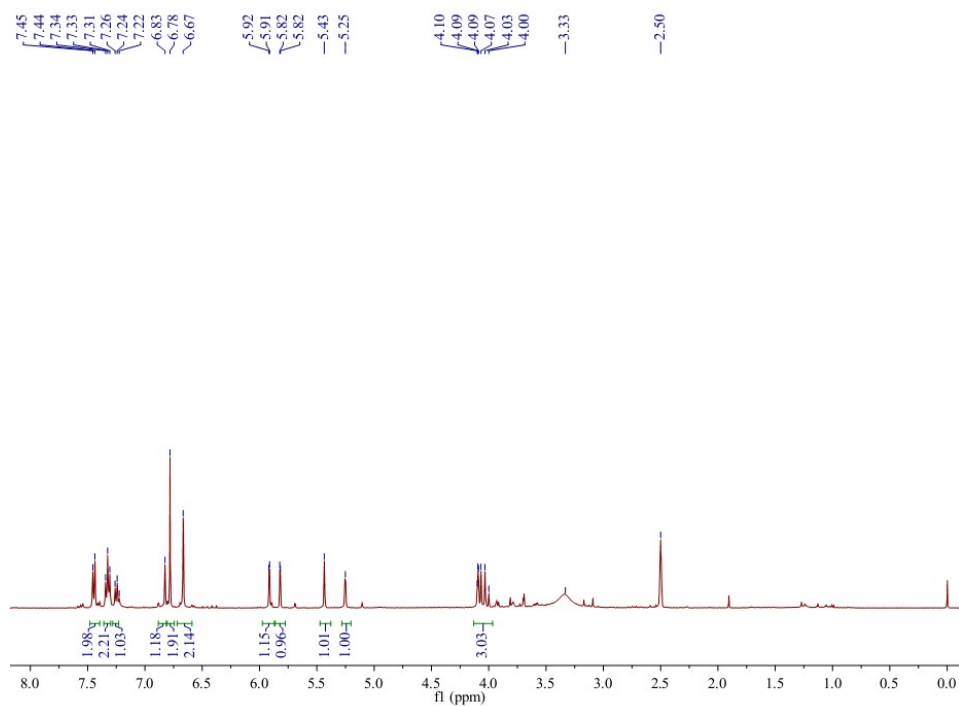

Figure S142. <sup>1</sup>H NMR of compound **JP-48** (DMSO-*d*<sub>6</sub>)



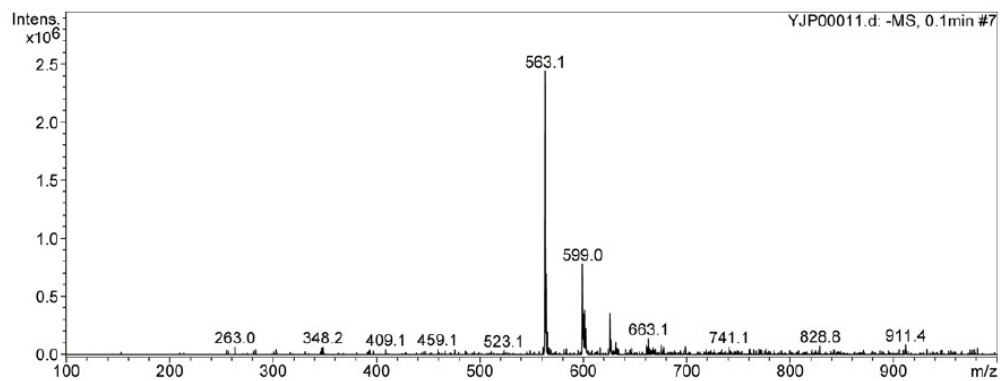

Figure S143. ESIMS of compound **JP-48**

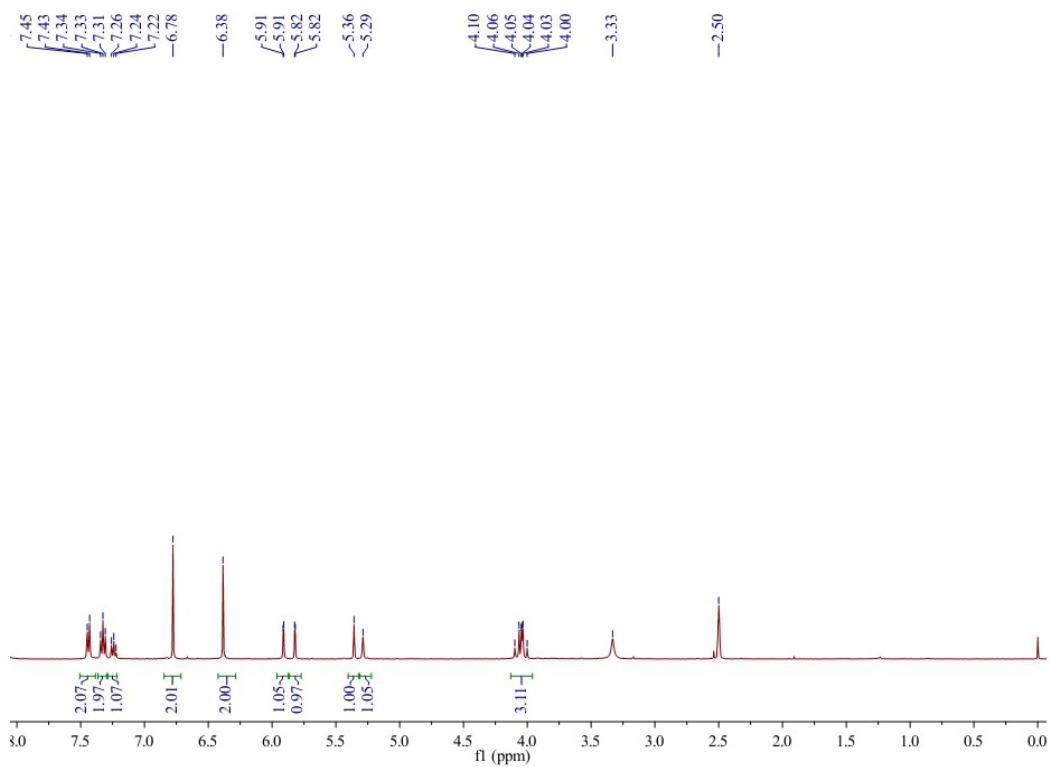

Figure S144.  $^1\text{H}$  NMR of compound **JP-49** ( $\text{DMSO-}d_6$ )

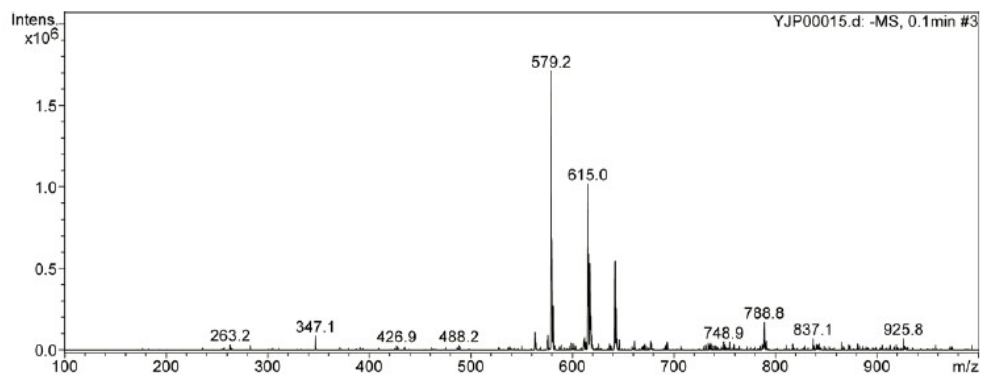

Figure S145. ESIMS of compound **JP-49**

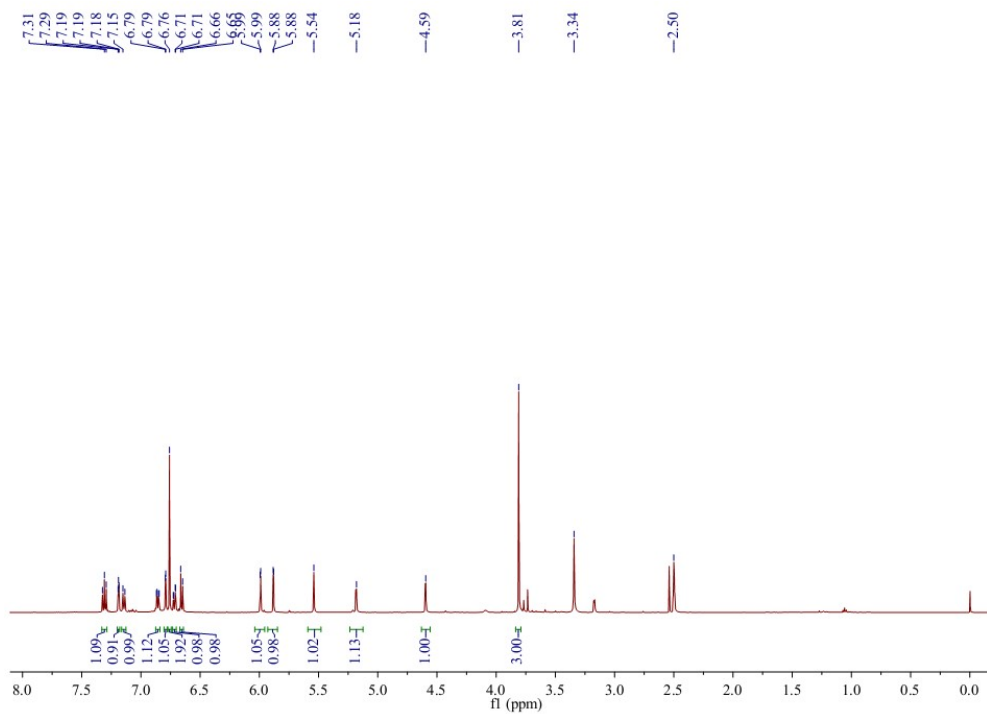

Figure S146. <sup>1</sup>H NMR of compound **JP-50** (DMSO-*d*<sub>6</sub>)

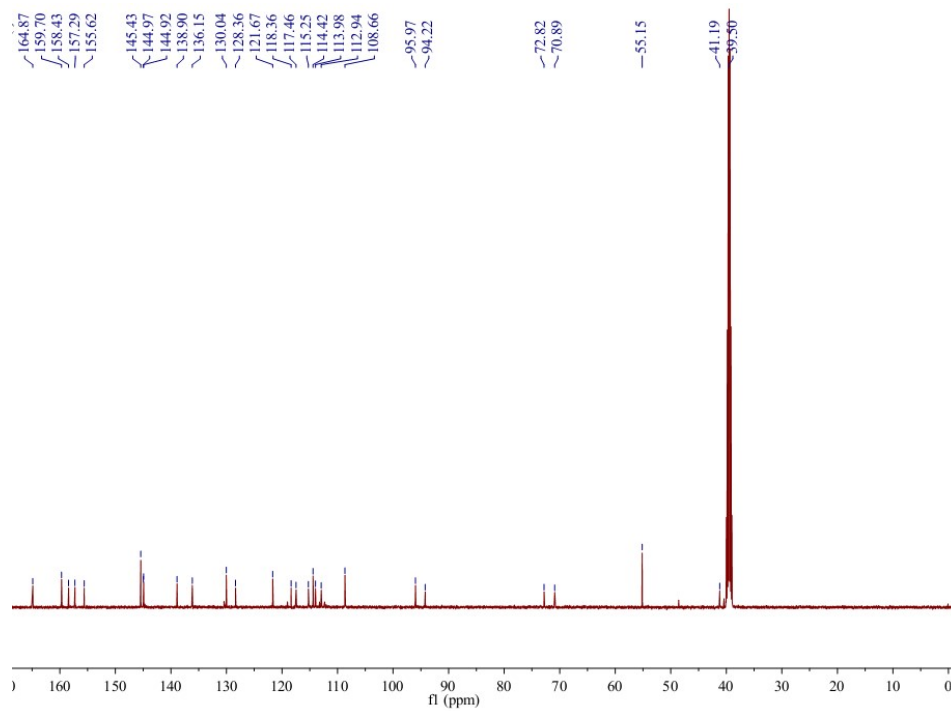

Figure S147.  $^{13}\text{C}$  NMR of compound **JP-50** ( $\text{DMSO-}d_6$ )

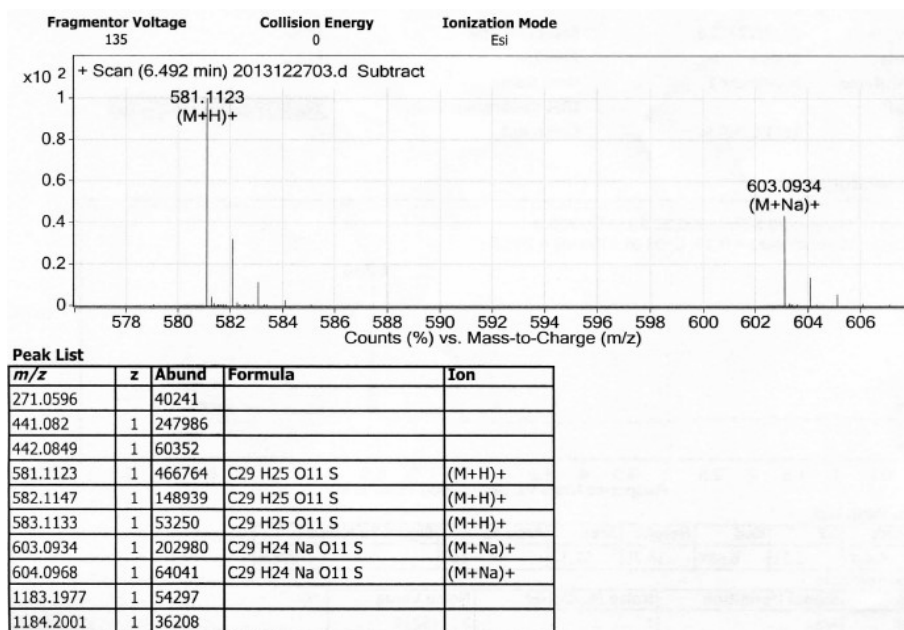

Figure S148. HRESIMS of compound **JP-50**

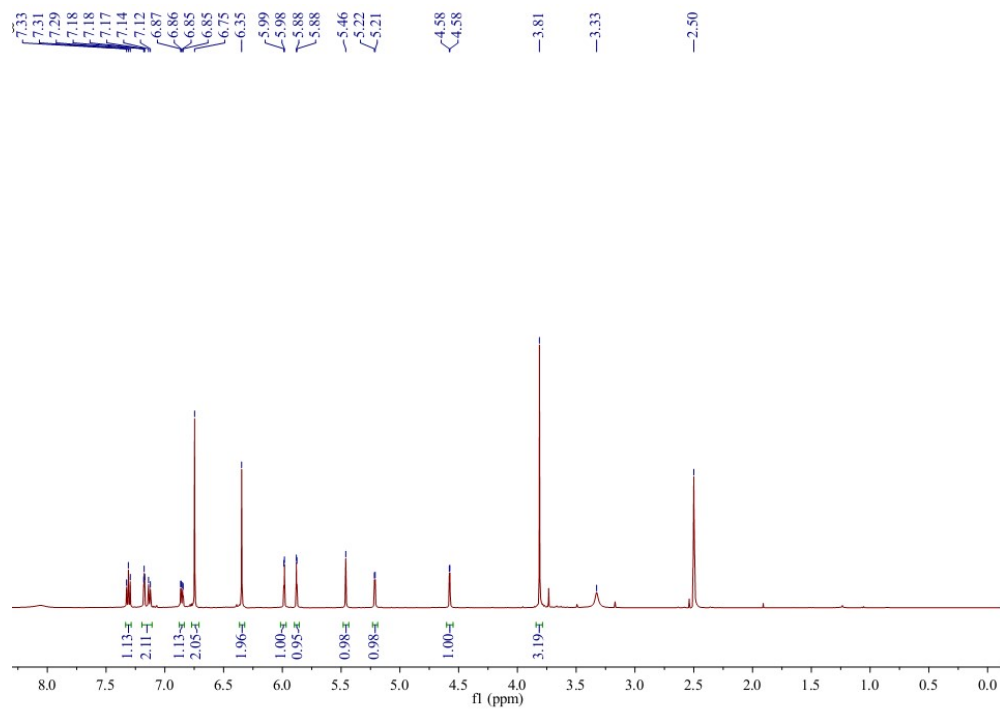

Figure S149.  $^1\text{H}$  NMR of compound **JP-51** ( $\text{DMSO-}d_6$ )

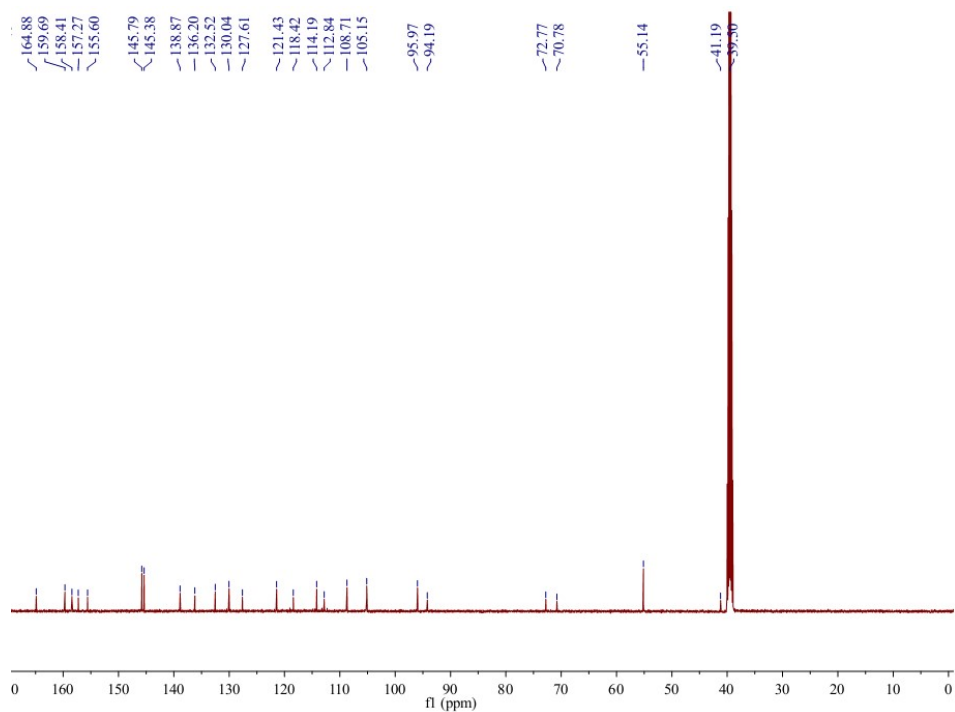

Figure S150.  $^{13}\text{C}$  NMR of compound **JP-51** ( $\text{DMSO-}d_6$ )

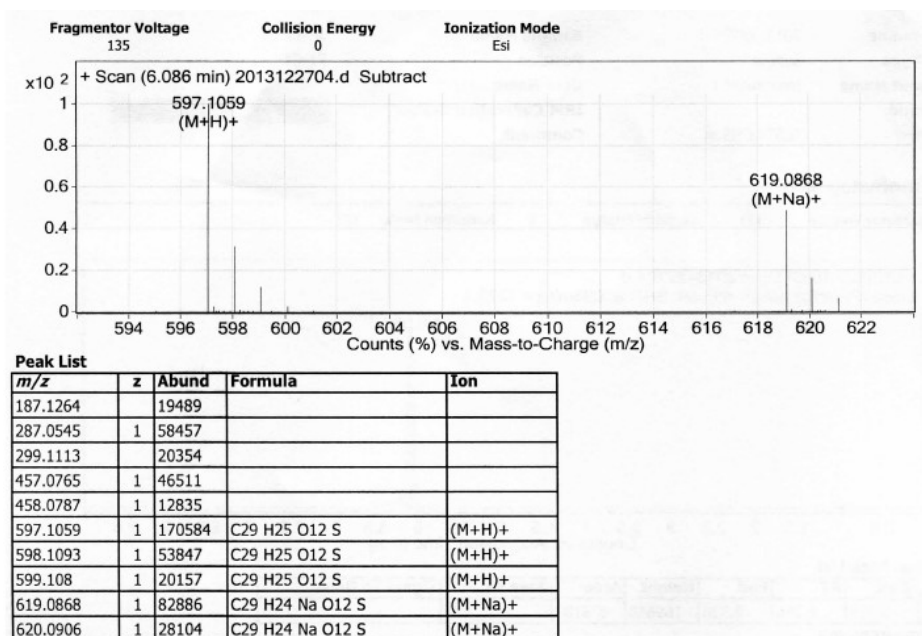

Figure S151. HRESIMS of compound **JP-51**

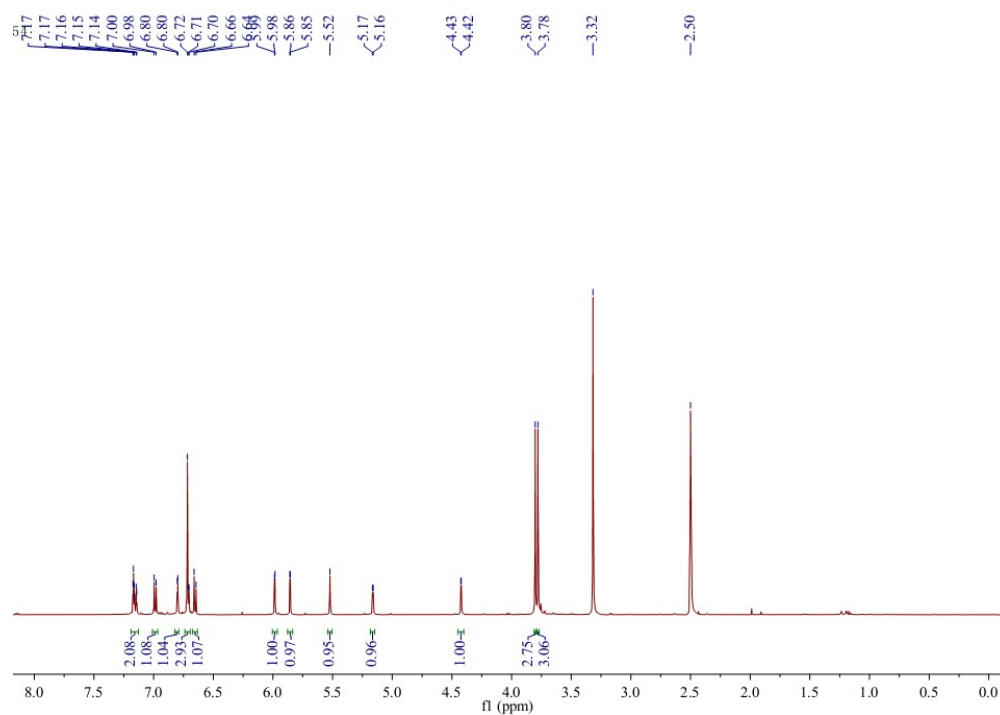

Figure S152. <sup>1</sup>H NMR of compound **JP-52** (DMSO-*d*<sub>6</sub>)

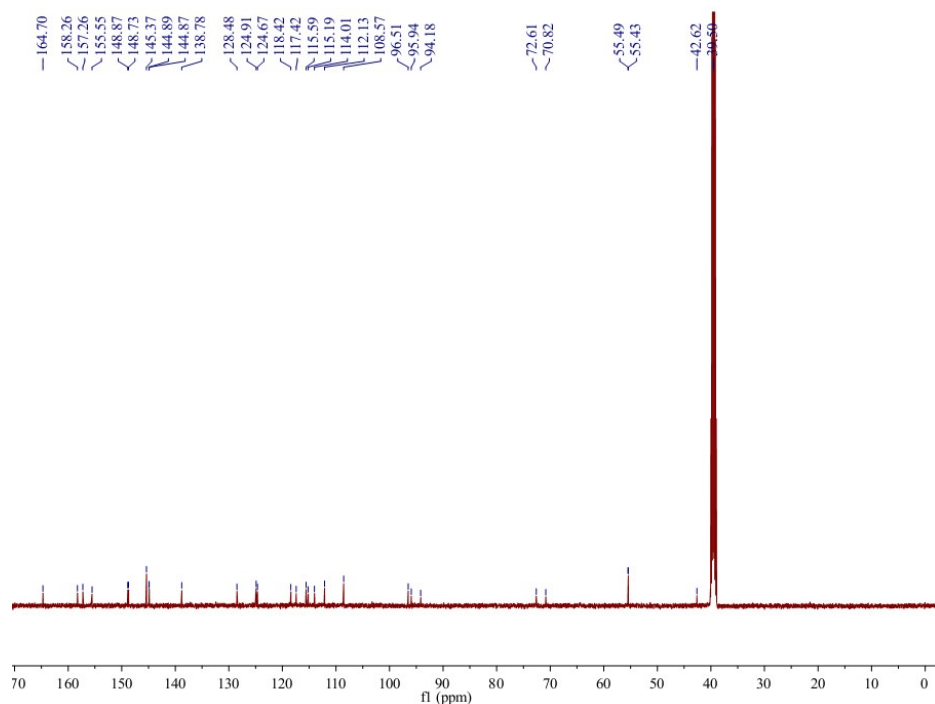

Figure S153.  $^{13}\text{C}$  NMR of compound **JP-52** ( $\text{DMSO-}d_6$ )

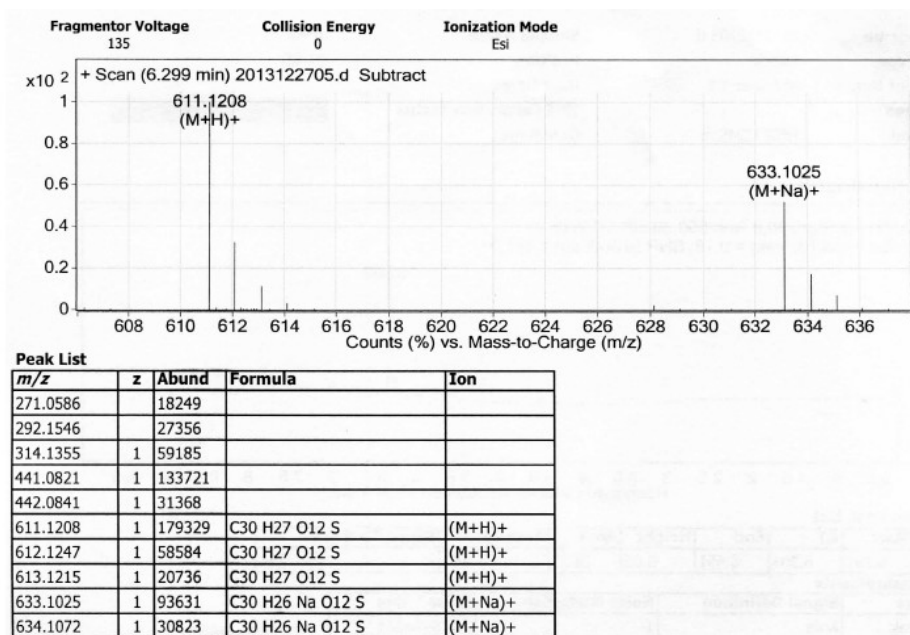

Figure S154. HRESIMS of compound **JP-52**

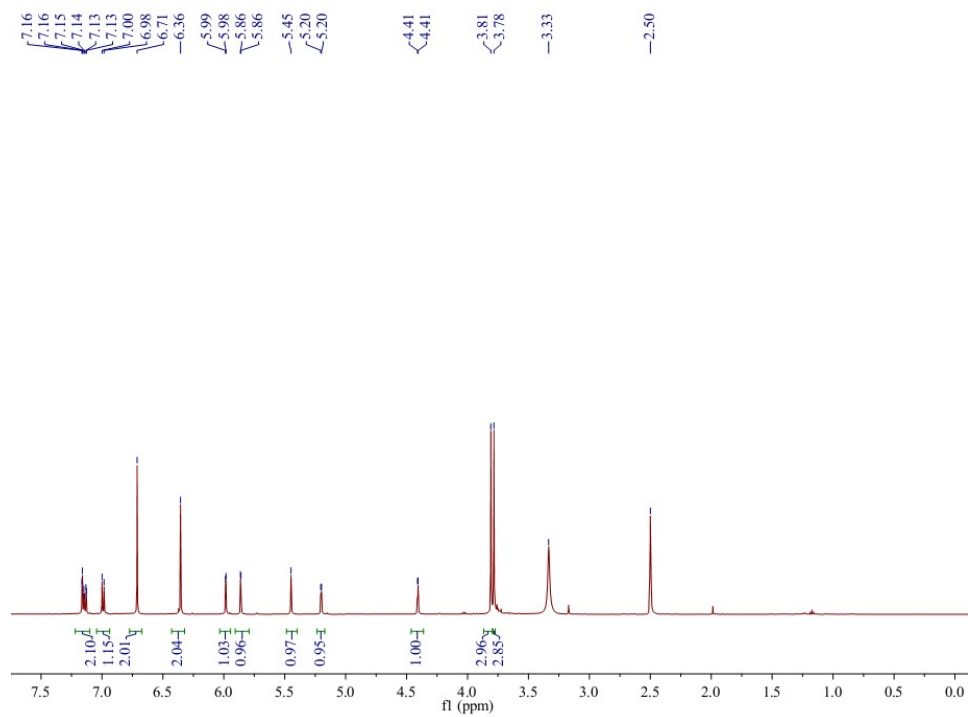

Figure S155.  $^1\text{H}$  NMR of compound **JP-53** ( $\text{DMSO-}d_6$ )

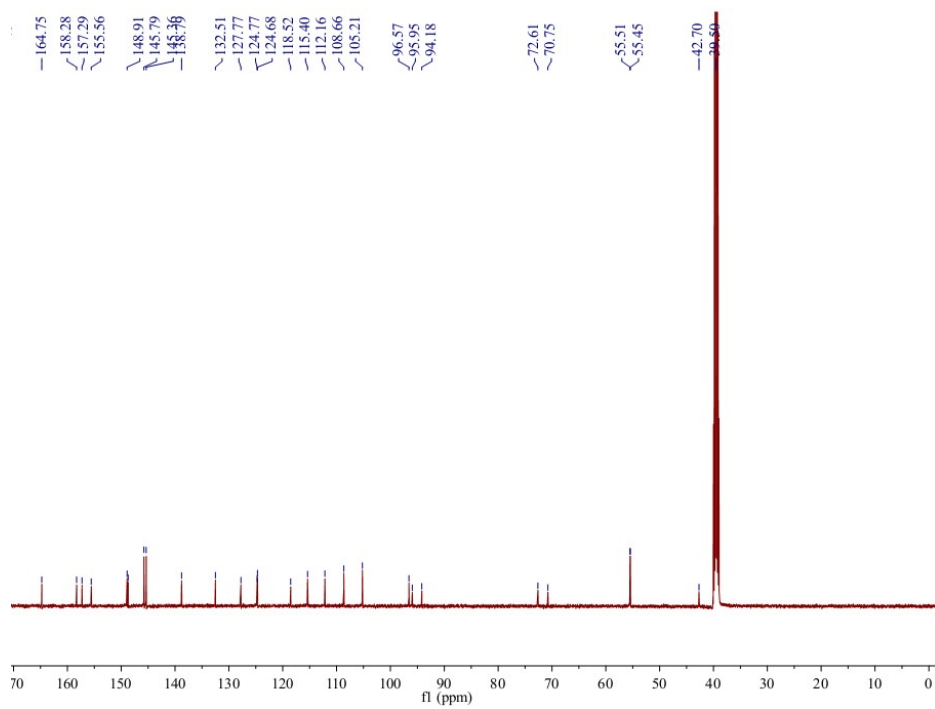

Figure S156.  $^{13}\text{C}$  NMR of compound **JP-53** ( $\text{DMSO-}d_6$ )

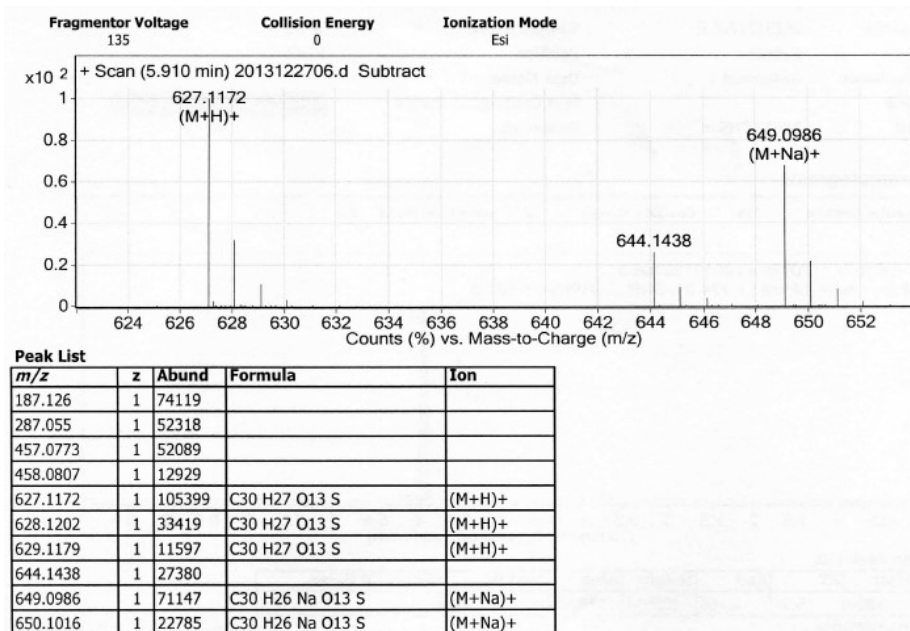

Figure S157. HRESIMS of compound **JP-53**

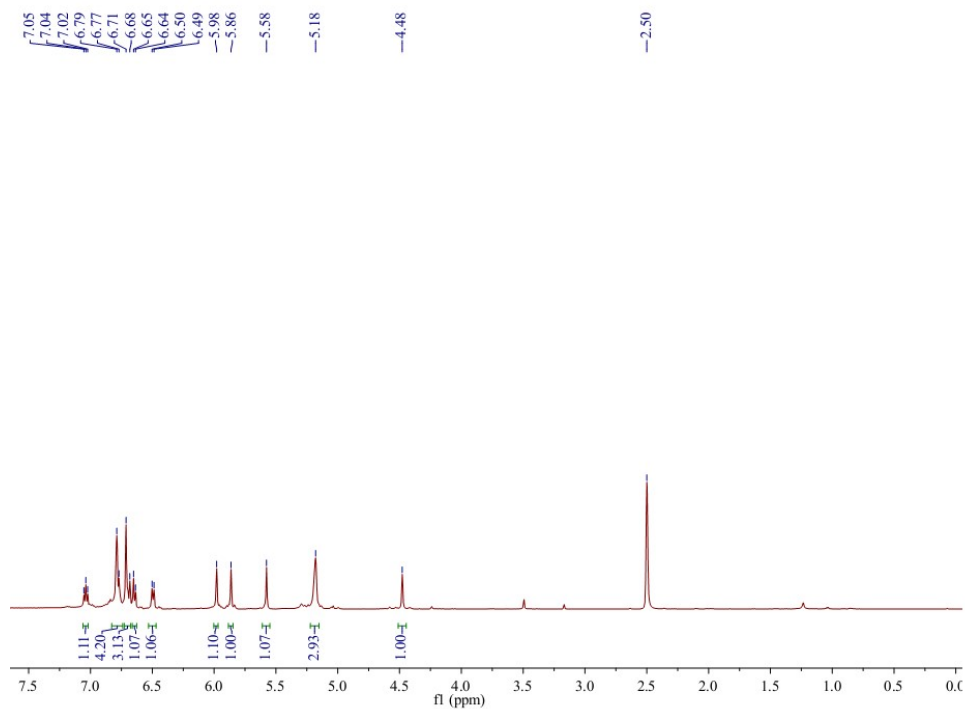

Figure S158. <sup>1</sup>H NMR of compound **JP-54** (DMSO-*d*<sub>6</sub>)



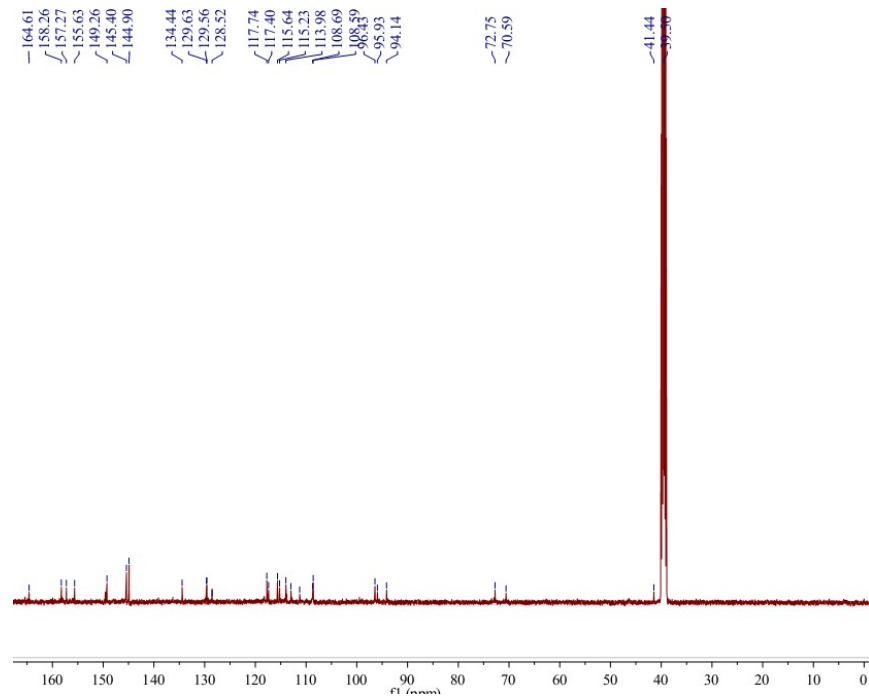

Figure S159.  $^{13}\text{C}$  NMR of compound **JP-54** ( $\text{DMSO-}d_6$ )

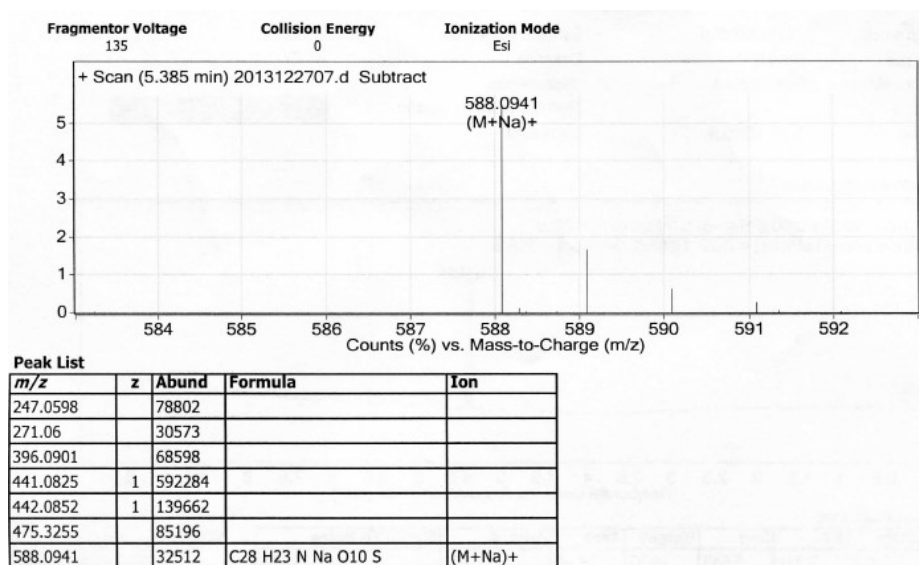

Figure S160. HRESIMS of compound **JP-54**

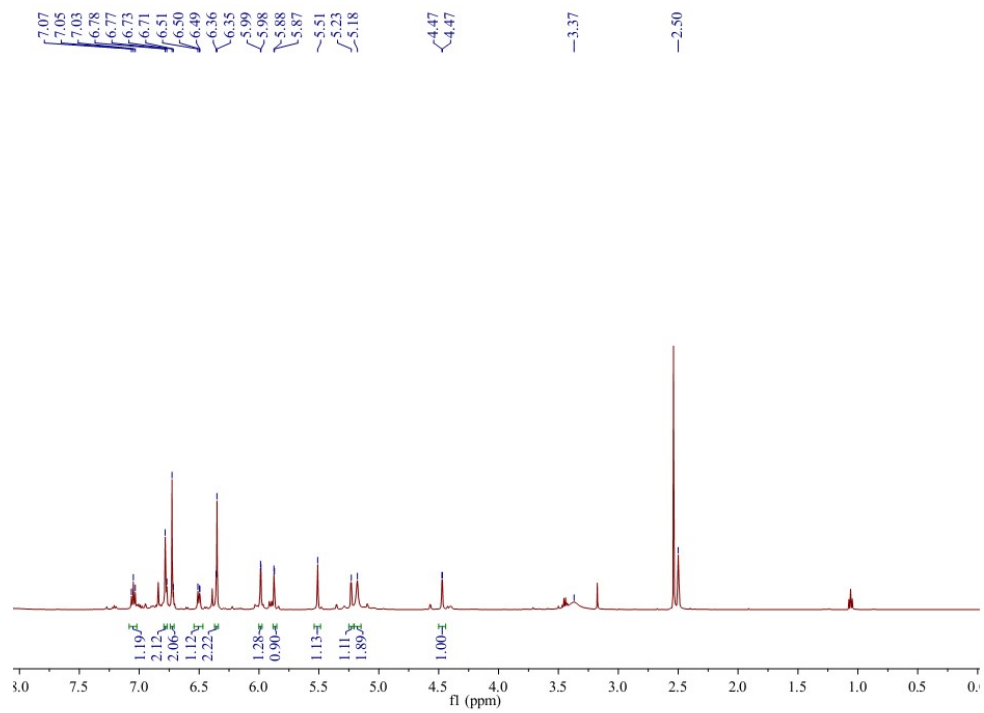

Figure S161.  $^1\text{H}$  NMR of compound **JP-55** ( $\text{DMSO-}d_6$ )

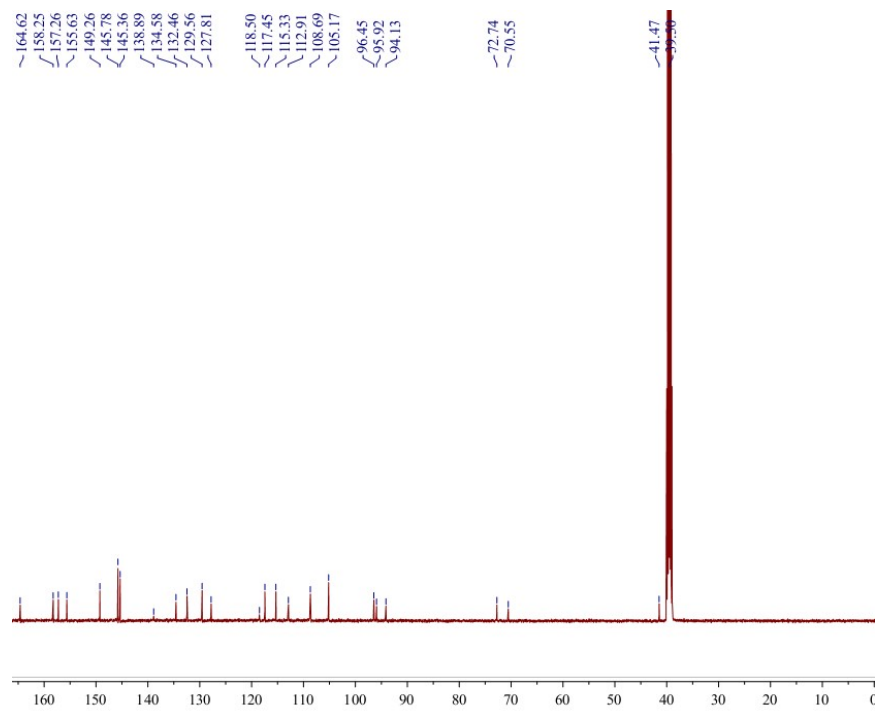

Figure S162.  $^{13}\text{C}$  NMR of compound **JP-55** ( $\text{DMSO-}d_6$ )

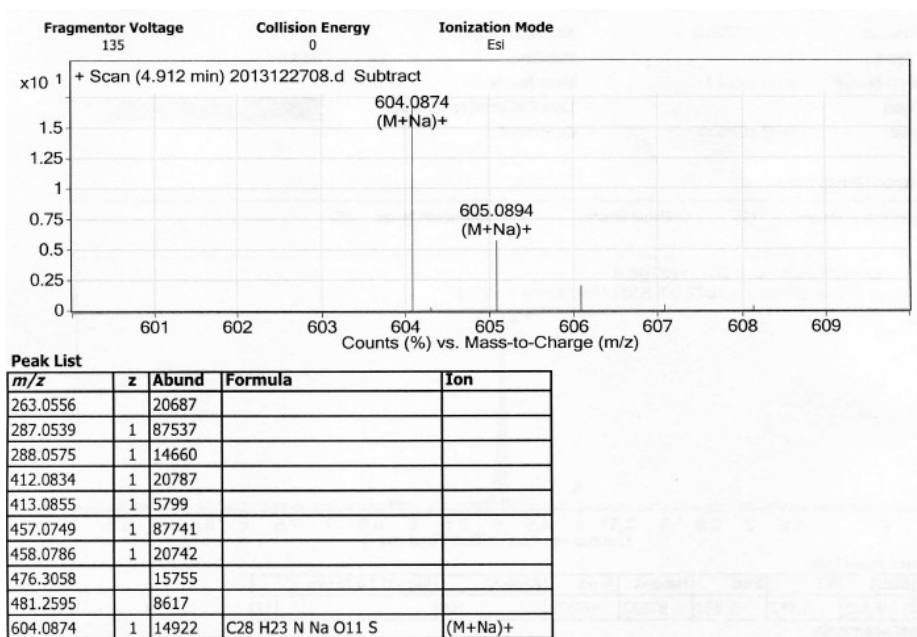

Figure S163. HRESIMS of compound **JP-55**

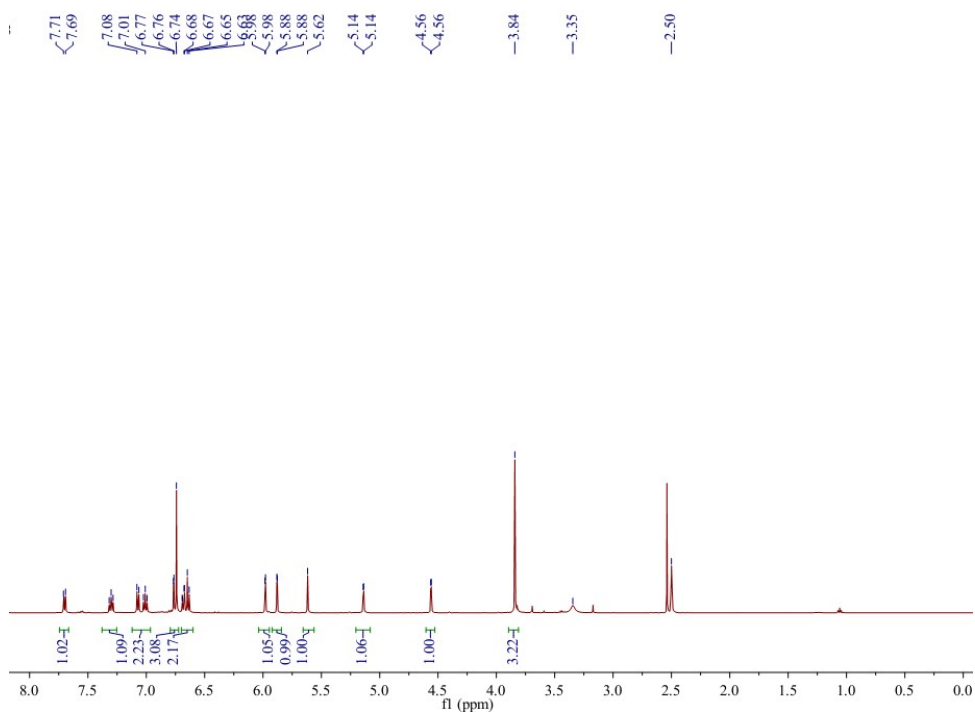

Figure S164. <sup>1</sup>H NMR of compound **JP-56** (DMSO-*d*<sub>6</sub>)

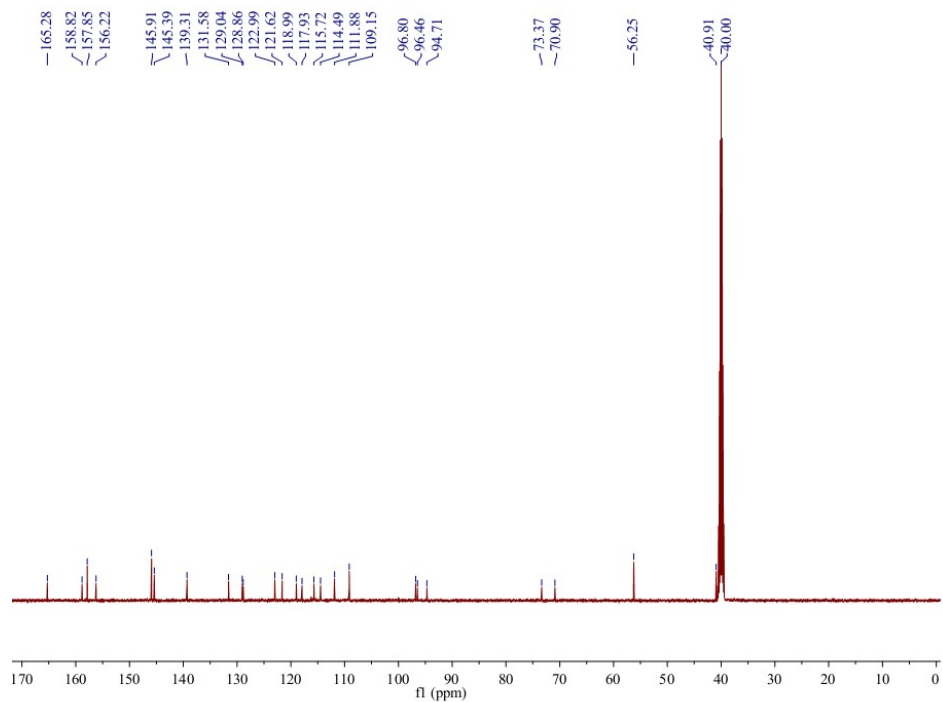

Figure S165.  $^{13}\text{C}$  NMR of compound **JP-56** ( $\text{DMSO-}d_6$ )

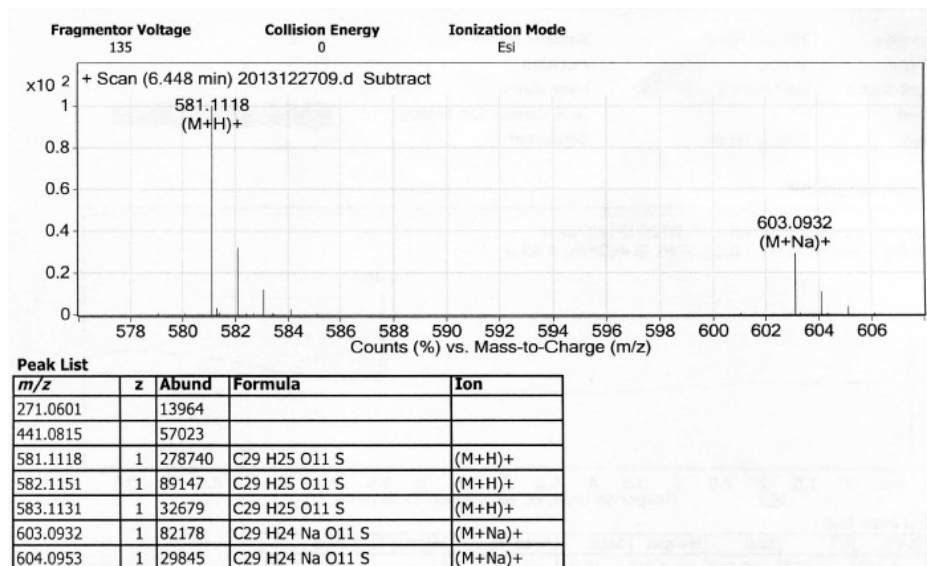

Figure S166. HRESIMS of compound **JP-56**

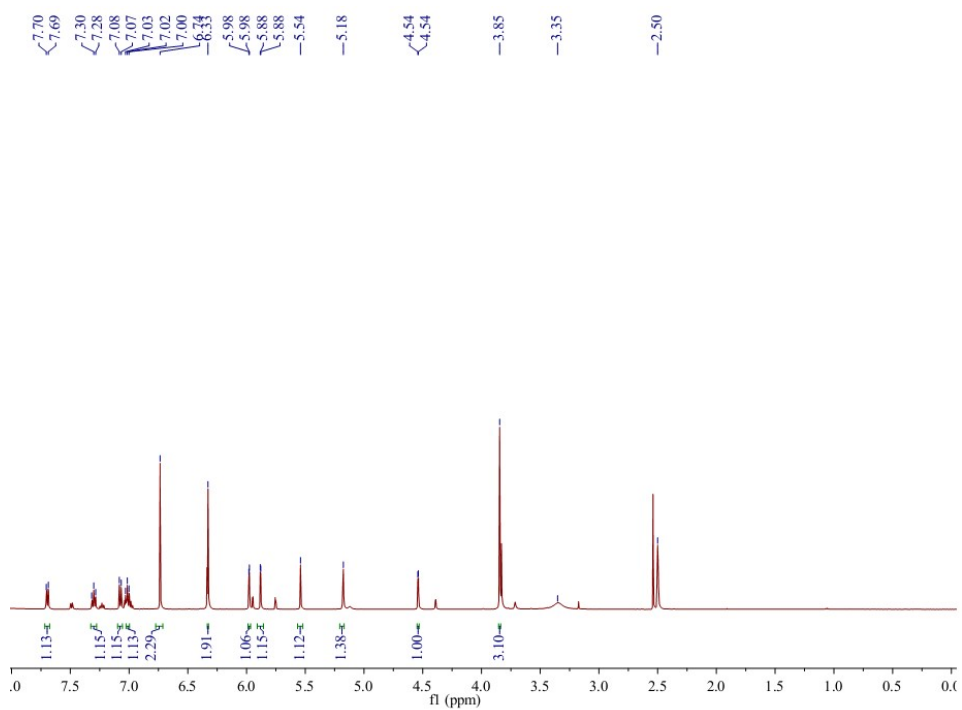

Figure S167.  $^1\text{H}$  NMR of compound **JP-57** ( $\text{DMSO-}d_6$ )

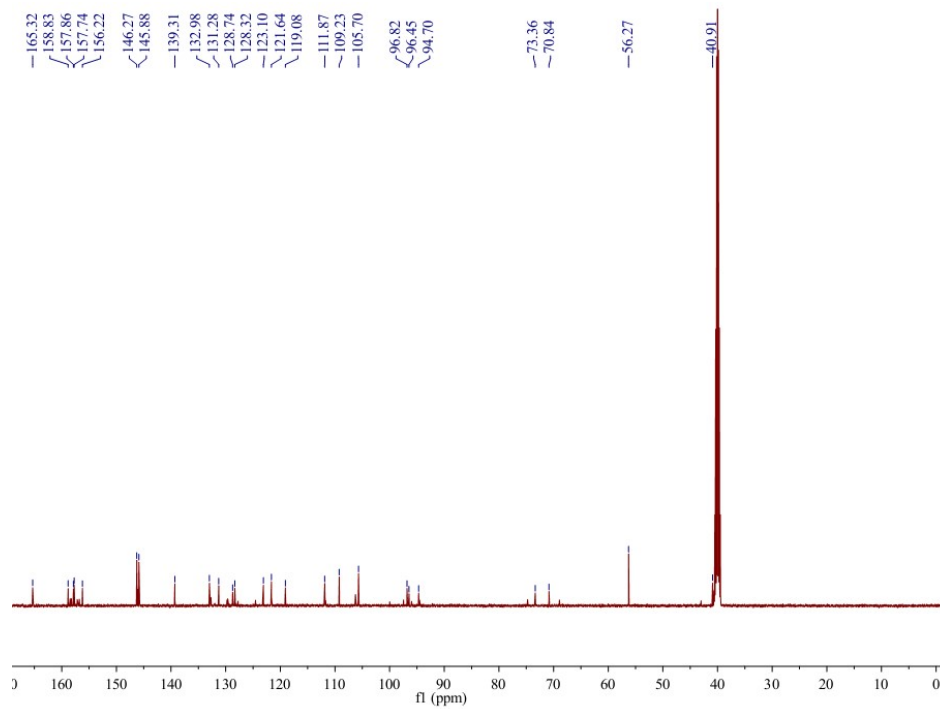

Figure S168.  $^{13}\text{C}$  NMR of compound **JP-57** ( $\text{DMSO-}d_6$ )

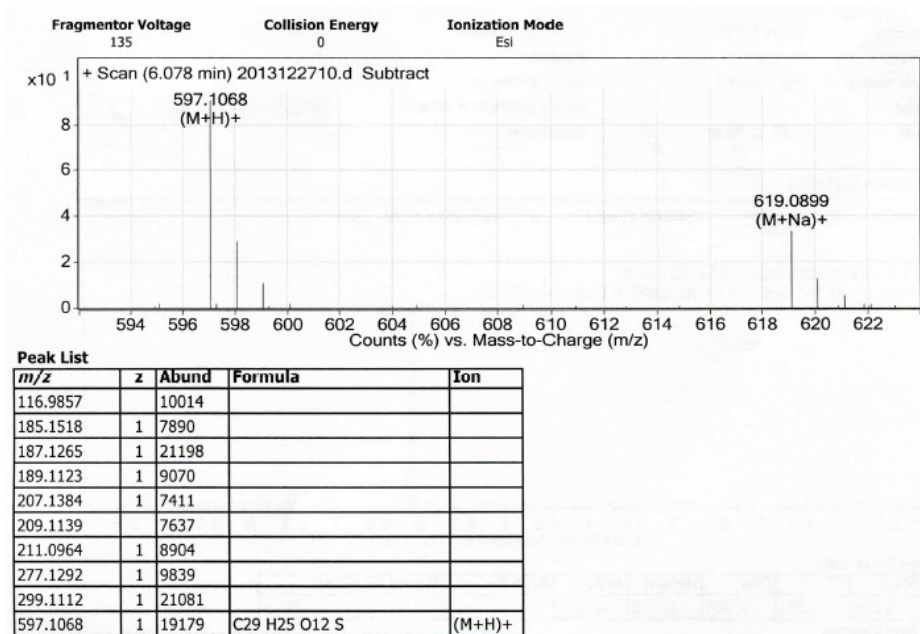

Figure S169. HRESIMS of compound **JP-57**

## 2. The reaction yield of compounds 1-57

| No.                                                                                                                                  | Name                                                                              | Yield(%) |
|--------------------------------------------------------------------------------------------------------------------------------------|-----------------------------------------------------------------------------------|----------|
| 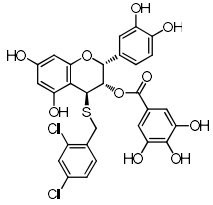 <p data-bbox="363 527 418 558"><b>JP-1</b></p>     | 4-( <i>S</i> )-(2,4-dichloro-benzylthio-yl)-Epicatechin gallate                   | 32.1%    |
|  <p data-bbox="363 779 418 810"><b>JP-2</b></p>     | 4-( <i>S</i> )-(2-furfuryl-thio-yl)-Epicatechin gallate                           | 33.2%    |
|  <p data-bbox="363 1035 418 1066"><b>JP-3</b></p>  | 4-( <i>S</i> )-(4-chloro-benzylthio-yl)-Epicatechin gallate                       | 29.8%    |
|  <p data-bbox="363 1291 418 1323"><b>JP-4</b></p> | 4-( <i>S</i> )-(2-methoxyl-benzylthio-yl)-Epicatechin gallate                     | 31.3%    |
|  <p data-bbox="363 1547 418 1579"><b>JP-5</b></p> | 4-( <i>S</i> )-(1-methoxy-1-oxo-2-( <i>S</i> )-propylthio-yl)-Epicatechin gallate | 15.1%    |
|  <p data-bbox="363 1803 418 1835"><b>JP-6</b></p> | 4-( <i>S</i> )-(1-methoxy-1-oxo-2-( <i>R</i> )-propylthio-yl)-Epicatechin gallate | 13.4%    |

|                                                                                                         |                                                                         |              |
|---------------------------------------------------------------------------------------------------------|-------------------------------------------------------------------------|--------------|
| 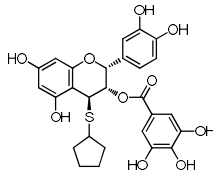 <p><b>JP-7</b></p>    | <p>4-(<i>S</i>)-(cyclo-pentylthio-yl)-Epicatechin gallate</p>           | <p>15.7%</p> |
|  <p><b>JP-8</b></p>    | <p>4-(<i>S</i>)-(2,4,6-trimethyl-benzylthio-yl)-Epicatechin gallate</p> | <p>29.8%</p> |
|  <p><b>JP-9</b></p>    | <p>4-(<i>S</i>)-(4-methoxy-phenylthio-yl)-Epicatechin gallate</p>       | <p>25.7%</p> |
|  <p><b>JP-10</b></p>  | <p>4-(<i>S</i>)-(2-amino-phenylthio-yl)-<br/>Epicatechin gallate</p>    | <p>27.8%</p> |
|  <p><b>JP-11</b></p> | <p>4-(<i>S</i>)-(1-butylthio-yl)-Epicatechin gallate</p>                | <p>15.7%</p> |
|  <p><b>JP-12</b></p> | <p>4-(<i>S</i>)-(1-allylthio-yl)-Epicatechin gallate</p>                | <p>17.6%</p> |
|  <p><b>JP-13</b></p> | <p>4-(<i>S</i>)-(2-methoxy-2-oxo-ethylthio-yl)-Epicatechin gallate</p>  | <p>27.9%</p> |



|                                                                                                         |                                                                          |              |
|---------------------------------------------------------------------------------------------------------|--------------------------------------------------------------------------|--------------|
| 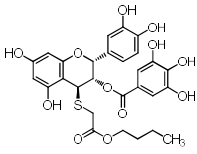 <p><b>JP-14</b></p>   | <p>4-(<i>S</i>)-(2-butoxy-2-oxo-ethylthio)-Epicatechin gallate</p>       | <p>29.7%</p> |
|  <p><b>JP-15</b></p>   | <p>4-(<i>S</i>)-(2-butoxy-2-oxo-ethylthio)-Epigallocatechin gallate</p>  | <p>28.5%</p> |
|  <p><b>JP-16</b></p>   | <p>4-(<i>S</i>)-(2-methoxy-2-oxo-ethylthio)-Epigallocatechin gallate</p> | <p>27.9%</p> |
|  <p><b>JP-17</b></p>  | <p>4-(<i>S</i>)-(4-chloro-benzylthio)-Epigallocatechin gallate</p>       | <p>30.9%</p> |
|  <p><b>JP-18</b></p> | <p>4-(<i>S</i>)-(4-methoxy-benzylthio)-Epigallocatechin gallate</p>      | <p>29.8%</p> |
|  <p><b>JP-19</b></p> | <p>4-(<i>S</i>)-(2,4-dichloro-benzylthio)-Epigallocatechin gallate</p>   | <p>30.8%</p> |
|  <p><b>JP-20</b></p> | <p>4-(<i>S</i>)-(4-methoxy-phenylthio)-Epigallocatechin gallate</p>      | <p>29.7%</p> |

|                                                                                                         |                                                                                |              |
|---------------------------------------------------------------------------------------------------------|--------------------------------------------------------------------------------|--------------|
| 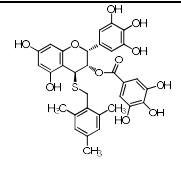 <p><b>JP-21</b></p>   | <p>4-(<i>S</i>)-(2,4,6-trimethyl-benzylthio-yl)-Epigallocatechin gallate</p>   | <p>27.8%</p> |
|  <p><b>JP-22</b></p>   | <p>4-(<i>S</i>)-(2-amino-phenylthio-yl)-Epicatechin gallate</p>                | <p>21.3%</p> |
|  <p><b>JP-23</b></p>   | <p>4-(<i>S</i>)-(1-allylthio-yl)-Epigallocatechin gallate</p>                  | <p>13.6%</p> |
|  <p><b>JP-24</b></p>  | <p>4-(<i>S</i>)-(1-butylthio-yl)-Epigallocatechin gallate</p>                  | <p>11.3%</p> |
|  <p><b>JP-25</b></p> | <p>4-(<i>S</i>)-(2-furfuryl-thio-yl)-Epigallocatechin gallate</p>              | <p>29.7%</p> |
|  <p><b>JP-26</b></p> | <p>4-(<i>S</i>)-(cyclo-pentylthio-yl)-Epigallocatechin gallate</p>             | <p>17.6%</p> |
|  <p><b>JP-27</b></p> | <p>4-(<i>S</i>)-(1-methoxy-1-oxo-2-propylthio-yl)-Epigallocatechin gallate</p> | <p>27.3%</p> |
|  <p><b>JP-28</b></p> | <p>4-(<i>S</i>)-(2-ethylthio-yl)-Epicatechin gallate</p>                       | <p>29.8%</p> |

|                                                                                                         |                                                                                   |              |
|---------------------------------------------------------------------------------------------------------|-----------------------------------------------------------------------------------|--------------|
| 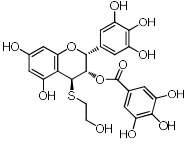 <p><b>JP-29</b></p>   | <p>4-(<i>S</i>)-(2-ethylthio-yl)-Epigallocatechin gallate</p>                     | <p>30.1%</p> |
|  <p><b>JP-30</b></p>   | <p>4-(<i>S</i>)-(3-methyl-2-(<i>R</i>)-butylthio-yl)-Epigallocatechin gallate</p> | <p>11.3%</p> |
|  <p><b>JP-31</b></p>   | <p>4-(<i>S</i>)-(3-methyl-2-(<i>S</i>)-butylthio-yl)-Epigallocatechin gallate</p> | <p>9.1%</p>  |
|  <p><b>JP-32</b></p>   | <p>4-(<i>S</i>)-(3-methyl-2-(<i>R</i>)-butylthio-yl)-Epicatechin gallate</p>      | <p>9.8%</p>  |
|  <p><b>JP-33</b></p> | <p>4-(<i>S</i>)-(3-methyl-2-(<i>S</i>)-butylthio-yl)-Epicatechin gallate</p>      | <p>11.7%</p> |
|  <p><b>JP-34</b></p> | <p>4-(<i>S</i>)-(2-chloro-benzylthio-yl)-Epicatechin gallate</p>                  | <p>31.5%</p> |
|  <p><b>JP-35</b></p> | <p>4-(<i>S</i>)-(2-chloro-benzylthio-yl)-Epigallocatechin gallate</p>             | <p>29.8%</p> |

|                                                                                                         |                                                                                                       |              |
|---------------------------------------------------------------------------------------------------------|-------------------------------------------------------------------------------------------------------|--------------|
| 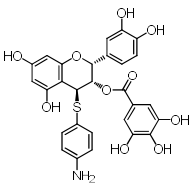 <p><b>JP-36</b></p>   | <p>4-(<i>S</i>)-(4-amino-phenylthio-yl)-Epicatechin gallate</p>                                       | <p>27.9%</p> |
|  <p><b>JP-37</b></p>   | <p>4-(<i>S</i>)-(4-amino-phenylthio-yl)-Epigallocatechin gallate</p>                                  | <p>28.7%</p> |
|  <p><b>JP-38</b></p>   | <p>4-(<i>S</i>)-(2-(<i>S</i>)-acetylamino-3-methoxy-3-oxo-propylthio-yl)-Epicatechin gallate</p>      | <p>28.6%</p> |
|  <p><b>JP-39</b></p>  | <p>4-(<i>S</i>)-(2-(<i>S</i>)-acetylamino-3-methoxy-3-oxo-propylthio-yl)-Epigallocatechin gallate</p> | <p>23.6%</p> |
|  <p><b>JP-40</b></p> | <p>4-(<i>S</i>)-(2-ethoxy-2-oxo-ethylthio-yl)-Epicatechin gallate</p>                                 | <p>27.6%</p> |
|  <p><b>JP-41</b></p> | <p>4-(<i>S</i>)-(2-ethoxy-2-oxo-ethylthio-yl)-Epigallocatechin gallate</p>                            | <p>27.9%</p> |
|  <p><b>JP-42</b></p> | <p>4-(<i>S</i>)-(2-pyrazinyl-ethylthio-yl)-Epicatechin gallate</p>                                    | <p>19.8%</p> |

|                                                                                                         |                                                                    |       |
|---------------------------------------------------------------------------------------------------------|--------------------------------------------------------------------|-------|
| 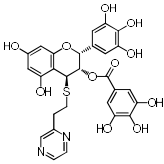 <p><b>JP-43</b></p>   | 4-( <i>S</i> )-(2-pyrazinyl-ethylthio-yl)-Epigallocatechin gallate | 11.4% |
|  <p><b>JP-44</b></p>   | 4-( <i>S</i> )-(4-fluoro-benzylthio-yl)-Epicatechin gallate        | 27.9% |
|  <p><b>JP-45</b></p>   | 4-( <i>S</i> )-(4-fluoro-benzylthio-yl)-Epigallocatechin gallate   | 28.3% |
|  <p><b>JP-46</b></p>  | 4-( <i>S</i> )-(4-hydroxy-phenylthio-yl)-Epicatechin gallate       | 13.4% |
|  <p><b>JP-47</b></p> | 4-( <i>S</i> )-(4-hydroxy-phenylthio-yl)-Epigallocatechin gallate  | 16.7% |
|  <p><b>JP-48</b></p> | 4-( <i>S</i> )-(benzylthio-yl)-Epigallocatechin gallate            | 33.2% |
|  <p><b>JP-49</b></p> | 4-( <i>S</i> )-(benzylthio-yl)-Epicatechin gallate                 | 30.1% |

|                                                                                                         |                                                                       |       |
|---------------------------------------------------------------------------------------------------------|-----------------------------------------------------------------------|-------|
| 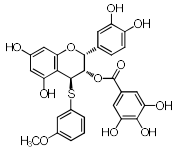 <p><b>JP-50</b></p>   | 4-( <i>S</i> )-(3-methoxy-phenylthio-yl)-Epicatechin gallate          | 23.5% |
|  <p><b>JP-51</b></p>   | 4-( <i>S</i> )-(3-methoxy-phenylthio-yl)-Epigallocatechin gallate     | 26.7% |
|  <p><b>JP-52</b></p>   | 4-( <i>S</i> )-(3,4-dimethoxy-phenylthio-yl)-Epicatechin gallate      | 28.6% |
|  <p><b>JP-53</b></p>   | 4-( <i>S</i> )-(3,4-dimethoxy-phenylthio-yl)-Epigallocatechin gallate | 27.1% |
|  <p><b>JP-54</b></p> | 4-( <i>S</i> )-(3-amino-phenylthio-yl)-Epicatechin gallate            | 19.8% |
|  <p><b>JP-55</b></p> | 4-( <i>S</i> )-(3-amino-phenylthio-yl)-Epigallocatechin gallate       | 20.1% |
|  <p><b>JP-56</b></p> | 4-( <i>S</i> )-(2-methoxy-phenylthio-yl)-Epicatechin gallate          | 29.8% |

|                                                                                                |                                                                        |              |
|------------------------------------------------------------------------------------------------|------------------------------------------------------------------------|--------------|
| 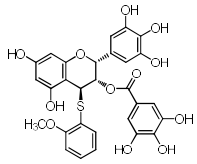 <p>JP-57</p> | <p>4-(<i>S</i>)-(2-methoxy-phenylthio-yl)-Epigallocatechin gallate</p> | <p>30.1%</p> |
|------------------------------------------------------------------------------------------------|------------------------------------------------------------------------|--------------|

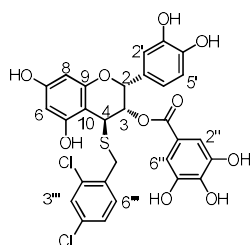

**JP-1:** UV  $\lambda_{\max}$  (MeOH) nm: 278, 216; mp. 146.2~148.7°C;  $[\alpha]_D^{25}$  -87.9° (*c* 0.1 MeOH); HR-ESI-MS ( $m/z$  633.0386  $[M+H]^+$ , calcd, 633.0383);  $^1\text{H}$  NMR (500 MHz, DMSO- $d_6$ )  $\delta$ : 7.65 (1H, s, 3'''-H), 7.62 (1H, dd,  $J$  = 8.0, 1.5, 5'''-H), 7.41 (1H, d,  $J$  = 8.0, 6'''-H), 6.87 (1H, d,  $J$  = 1.5, 2'-H), 6.82 (2H, s, 2'', 6''-H), 6.72 (1H, dd,  $J$  = 8.0, 1.5, 6'-H), 6.68 (1H, d,  $J$  = 8.0, 5'-H), 5.91 (1H, d,  $J$  = 2.0, 8-H), 5.83 (1H, d,  $J$  = 2.0, 6-H), 5.44 (1H, s, 3-H), 5.27 (1H, s, 2-H), 4.12 (1H, s, 4-H), 4.10 (2H, s, S-C-H);  $^{13}\text{C}$  NMR (125 MHz, DMSO- $d_6$ )  $\delta$ : 165.2 (O-C-O), 158.1 (C-5), 157.2 (C-7), 155.4 (C-9), 145.4 (C-3'', 5''), 144.9 (C-3', 4'), 138.9 (C-4''), 135.4 (C-2'''), 134.1 (C-4'''), 132.4 (C-6'''), 132.2 (C-1'), 128.9 (C-3'''), 127.3 (C-1''', 5'''), 118.4 (C-1''), 117.5 (C-6'), 115.2 (C-5'), 114.2 (C-2'), 108.6 (C-2'', 6''), 96.6 (C-10), 95.9 (C-6), 94.0 (C-8), 72.8 (C-2), 71.3 (C-3), 40.0 (C-4), 33.1 (S-C).

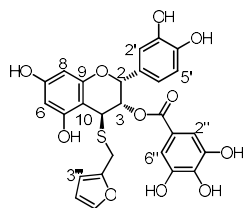

**JP-2:** UV  $\lambda_{\max}$  (MeOH) nm: 278, 216; mp. 157.5~160.1°C;  $[\alpha]_D^{25}$  -131.5° (*c* 0.1 MeOH); HR-ESI-MS ( $m/z$  555.0966  $[M+H]^+$ , calcd, 555.0956);  $^1\text{H}$  NMR (500 MHz, DMSO- $d_6$ )  $\delta$ : 7.62 (1H, dd,  $J$  = 8.0, 1.5, 5'''-H), 6.85 (1H, d,  $J$  = 1.5, 2'-H), 6.79 (2H,

s, 2'', 6''-H), 6.73 (2H, m, 5', 6'-H), 6.41 (1H, d,  $J = 8.0$ , 4'''-H), 6.38 (1H, d,  $J = 8.0$ , 1.5, 3'''-H), 5.92 (1H, d,  $J = 1.2$ , 8-H), 5.84 (1H, d,  $J = 1.2$ , 6-H), 5.42 (1H, s, 3-H), 5.27 (1H, s, 2-H), 4.13 (1H, d,  $J = 1.2$ , 4-H), 4.08 (2H, s, S-C-H);  $^{13}\text{C}$  NMR (125 MHz, DMSO- $d_6$ )  $\delta$ : 165.0 (O-C-O), 158.0 (C-5), 157.1 (C-7), 155.4 (C-9), 151.5 (C-2'''), 145.4 (C-3'', 5''), 144.8 (C-3', 4'), 142.3 (C-5'''), 138.8 (C-4''), 128.5 (C-1'), 118.5 (C-1''), 117.5 (C-6'), 115.2 (C-5'), 114.1 (C-2'), 110.5 (C-4'''), 108.6 (C-2'', 6''), 107.5 (C-3'''), 96.8 (C-10), 95.9 (C-6), 94.0 (C-8), 72.6 (C-2), 71.0 (C-3), 40.0 (C-4), 27.9 (S-C).

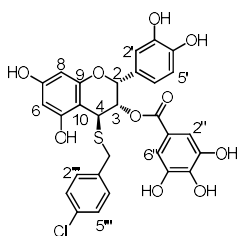

**JP-3:** UV  $\lambda_{\text{max}}$  (MeOH) nm: 278, 216; mp. 142.0~143.7°C;  $[\alpha]_D^{25}$  -93.6° (c 0.1 MeOH); HR-ESI-MS ( $m/z$  599.0782  $[\text{M}+\text{H}]^+$ , calcd, 599.0773);  $^1\text{H}$  NMR (500 MHz, DMSO- $d_6$ )  $\delta$ : 7.48 (2H, m, 3''', 5'''-H), 7.39 (2H, m, 2''', 6'''-H), 6.86 (1H, s, 2'-H), 6.79 (2H, s, 2'', 6''-H), 6.68 (2H, m, 5', 6'-H), 5.92 (1H, d,  $J = 2.0$ , 8-H), 5.83 (1H, d,  $J = 2.0$ , 6-H), 5.44 (1H, s, 3-H), 5.23 (1H, s, 2-H), 4.05 (2H, s, S-C-H), 4.04 (1H, d,  $J = 2.0$ , 4-H);  $^{13}\text{C}$  NMR (125 MHz, DMSO- $d_6$ )  $\delta$ : 165.1 (O-C-O), 158.1 (C-5), 157.2 (C-7), 155.4 (C-9), 145.4 (C-3'', 5''), 144.9 (C-3', 4'), 138.9 (C-4''), 138.0 (C-1'''), 131.3 (C-4'''), 130.7 (C-2''', 6'''), 128.5 (C-1'), 128.2 (C-3''', 5'''), 118.5 (C-1''), 117.5 (C-6'), 115.2 (C-5'), 114.2 (C-2'), 108.6 (C-2'', 6''), 96.9 (C-10), 95.9 (C-6), 94.0 (C-8), 72.7 (C-2), 71.2 (C-3), 40.0 (C-4), 35.0 (S-C).

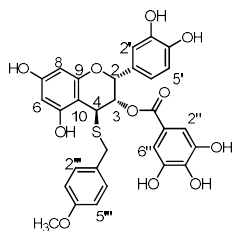

**JP-4:** UV  $\lambda_{\text{max}}$  (MeOH) nm: 278, 216; mp. 142.1~144.0°C;  $[\alpha]_D^{25}$  -89.1° (c 0.1 MeOH); HR-ESI-MS ( $m/z$  595.1265  $[\text{M}+\text{H}]^+$ , calcd, 595.1269);  $^1\text{H}$  NMR (500 MHz,



DMSO-*d*<sub>6</sub>)  $\delta$ : 7.37 (2H, m, 2''', 6'''-H), 6.90 (2H, m, 3''', 5'''-H), 6.84 (1H, s, 2'-H), 6.79 (2H, s, 2'', 6''-H), 6.67 (2H, m, 5', 6'-H), 5.92 (1H, d,  $J = 2.5$ , 8-H), 5.83 (1H, d,  $J = 2.5$ , 6-H), 5.44 (1H, s, 3-H), 5.25 (1H, s, 2-H), 4.08 (1H, d,  $J = 2.0$ , 4-H), 4.00 (2H, dd,  $J = 27.0$ , 13.5, S-C-H), 3.75 (3H, s, -OCH<sub>3</sub>); <sup>13</sup>C NMR (125 MHz, DMSO-*d*<sub>6</sub>)  $\delta$ : 165.0 (O-C-O), 158.1 (C-5), 157.9 (C-4'''), 157.1 (C-7), 155.3 (C-9), 145.4 (C-3'', 5''), 144.8 (C-3', 4'), 138.8 (C-4''), 130.4 (C-1'''), 129.9 (C-2''', 6'''), 128.5 (C-1'), 118.6 (C-1''), 117.4 (C-6'), 115.1 (C-5'), 114.1 (C-2'), 113.7 (C-3''', 5'''), 108.6 (C-2'', 6''), 97.1 (C-10), 95.9 (C-6), 94.0 (C-8), 72.6 (C-2), 71.2 (C-3), 55.0 (C-OCH<sub>3</sub>), 45.6 (C-4), 35.2 (S-C).

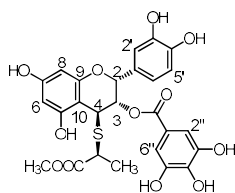

**JP-5:** UV  $\lambda_{\max}$  (MeOH) nm: 278, 216; mp. 144.4~146.3°C;  $[\alpha]_D^{25} -47.8^\circ$  (*c* 0.1 MeOH); HR-ESI-MS ( $m/z$  561.1065 [M+H]<sup>+</sup>, calcd, 561.1061); <sup>1</sup>H NMR (500 MHz, DMSO-*d*<sub>6</sub>)  $\delta$ : 6.84 (1H, d,  $J = 2.0$ , 2'-H), 6.78 (2H, m, 2'', 6''-H), 6.75 (1H, dd,  $J = 8.0$ , 2.0, 6'-H), 6.69 (1H, d,  $J = 8.0$ , 5'-H), 5.95 (1H, d,  $J = 2.5$ , 8-H), 5.84 (1H, d,  $J = 2.5$ , 6-H), 5.33 (1H, s, 3-H), 5.30 (1H, s, 2-H), 4.17 (1H, d,  $J = 2.0$ , 4-H), 3.91 (1H, dd,  $J = 14.0$ , 7.0, S-C-H), 3.72 (3H, s, -O-C-O-CH<sub>3</sub>), 1.55 (3H, d,  $J = 7.0$ , -C-CH<sub>3</sub>); <sup>13</sup>C NMR (125 MHz, DMSO-*d*<sub>6</sub>)  $\delta$ : 173.0 (-COOCH<sub>3</sub>), 165.0 (O-C-O), 158.2 (C-5), 157.2 (C-7), 155.2 (C-9), 145.5 (C-3'', 5''), 145.0 (C-3'), 144.9 (C-4'), 138.9 (C-4''), 128.5 (C-1'), 118.5 (C-1''), 117.5 (C-6'), 115.3 (C-5'), 114.1 (C-2'), 108.6 (C-2'', 6''), 97.1 (C-10), 96.0 (C-6), 94.1 (C-8), 72.8 (C-2), 71.8 (C-3), 52.3 (C-OCH<sub>3</sub>), 42.4 (S-C), 40.0 (C-4), 18.3 (C-CH<sub>3</sub>).

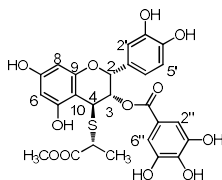

**JP-6:** UV  $\lambda_{\max}$  (MeOH) nm: 278, 216; mp. 147.8~150.2°C;  $[\alpha]_D^{25} -164.3^\circ$  (*c* 0.1 MeOH); HR-ESI-MS ( $m/z$  561.107 [M+H]<sup>+</sup>, calcd, 561.1075); <sup>1</sup>H NMR (500 MHz,

DMSO- $d_6$ )  $\delta$ : 6.86 (1H, d,  $J = 2.0$ , 2'-H), 6.79 (2H, m, 2'', 6''-H), 6.76 (1H, dd,  $J = 8.0$ , 2.0, 6'-H), 6.69 (1H, d,  $J = 8.0$ , 5'H), 5.94 (1H, d,  $J = 2.5$ , 8-H), 5.84 (1H, d,  $J = 2.5$ , 6-H), 5.39 (1H, s, 3-H), 5.23 (1H, s, 2-H), 4.26 (1H, d,  $J = 2.0$ , 4-H), 3.84 (1H, dd,  $J = 14.0$ , 7.0, S-C-H), 3.69 (3H, s, -O-C-O-CH<sub>3</sub>), 1.48 (3H, d,  $J = 7.0$ , -C-CH<sub>3</sub>); <sup>13</sup>C NMR (125 MHz, DMSO- $d_6$ )  $\delta$ : 173.0 (-COOCH<sub>3</sub>), 164.9 (O-C-O), 158.2 (C-5), 157.2 (C-7), 155.5 (C-9), 145.5 (C-3'', 5''), 145.0 (C-3'), 144.9 (C-4'), 138.9 (C-4''), 128.5 (C-1'), 118.5 (C-1''), 117.5 (C-6'), 115.3 (C-5'), 114.1 (C-2'), 108.7 (C-2'', 6''), 96.4 (C-10), 95.9 (C-6), 94.1 (C-8), 72.9 (C-2), 71.6 (C-3), 52.1 (C-OCH<sub>3</sub>), 40.9 (S-C), 40.0 (C-4), 17.5 (C-CH<sub>3</sub>).

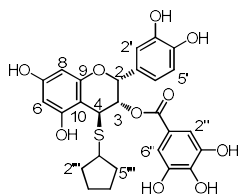

**JP-7:** UV  $\lambda_{\max}$  (MeOH) nm: 278, 216; mp. 146.6~149.5°C;  $[\alpha]_D^{25}$  -107.5° (*c* 0.1 MeOH); HR-ESI-MS ( $m/z$  543.1323 [M+H]<sup>+</sup>, calcd, 543.1319); <sup>1</sup>H NMR (500 MHz, DMSO- $d_6$ )  $\delta$ : 6.85 (1H, s, 2'-H), 6.76 (2H, m, 2'', 6''-H), 6.75 (1H, dd,  $J = 8.0$ , 2.0, 6'-H), 6.68 (1H, d,  $J = 8.0$ , 5'-H), 5.92 (1H, d,  $J = 2.0$ , 8-H), 5.81 (1H, d,  $J = 2.0$ , 6-H), 5.41 (1H, s, 3-H), 5.21 (1H, s, 2-H), 4.02 (1H, s, 4-H), 3.44 (1H, m, 1'''-H), 2.10 (2H, m, 2''', 5'''-H), 1.73 (2H, m, 2''', 5'''-H), 1.58 (4H, m, 3''', 4'''-H); <sup>13</sup>C NMR (125 MHz, DMSO- $d_6$ )  $\delta$ : 165.2 (O-C-O), 157.8 (C-5), 157.0 (C-7), 155.1 (C-9), 145.4 (C-3'', 5''), 144.9 (C-3', 4'), 138.9 (C-4''), 128.7 (C-1'), 118.5 (C-1''), 117.5 (C-6'), 115.3 (C-5'), 114.0 (C-2'), 108.6 (C-2'', 6''), 97.8 (C-10), 95.9 (C-6), 94.0 (C-8), 72.8 (C-2), 72.0 (C-3), 44.2 (C-4), 40.0 (S-C), 33.8 (C-2'''), 33.5 (C-5'''), 24.6 (C-3'''), 24.2 (C-4''').

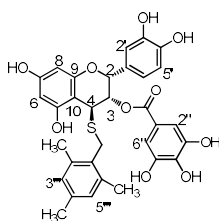

**JP-8:** UV  $\lambda_{\max}$  (MeOH) nm: 278, 216; mp. 140.1~142.3°C;  $[\alpha]_D^{25}$  -26° (*c* 0.1 MeOH); HR-ESI-MS ( $m/z$  607.1643 [M+H]<sup>+</sup>, calcd, 607.1646); <sup>1</sup>H NMR (500 MHz,

DMSO-*d*<sub>6</sub>)  $\delta$ : 6.88 (1H, d,  $J = 1.5$ , 2'-H), 6.86 (2H, s, 2'', 6''-H), 6.82 (2H, s, 3''', 5'''-H), 6.79 (1H, dd,  $J = 8.5, 1.5$ , 6'-H), 6.72 (1H, d,  $J = 1.5$ , 5'-H), 5.96 (1H, d,  $J = 2.5$ , 8-H), 5.84 (1H, d,  $J = 2.5$ , 6-H), 5.45 (1H, s, 3-H), 5.33 (1H, s, 2-H), 4.14 (2H, s, 4-H), 4.05 (1H, s, S-C-H), 2.42 (6H, s, 2''', 6'''-CH<sub>3</sub>), 2.22 (3H, s, 4'''-CH<sub>3</sub>); <sup>13</sup>C NMR (125 MHz, DMSO-*d*<sub>6</sub>)  $\delta$ : 165.2 (O-C-O), 158.0 (C-5), 157.4 (C-7), 155.2 (C-9), 145.5 (C-3'', 5''), 145.0 (C-3', 4'), 138.9 (C-4''), 136.5 (C-2''', 6'''), 135.9 (C-1'''), 130.3 (C-4'''), 128.7 (C-3''', 5'''), 128.6 (C-1'), 118.6 (C-1''), 117.5 (C-6'), 115.3 (C-5'), 114.1 (C-2'), 108.7 (C-2'', 6''), 97.3 (C-10), 96.0 (C-6), 94.1 (C-8), 73.1 (C-2), 71.7 (C-3), 40.6 (C-4), 31.1 (S-C), 20.6 (C-4'''CH<sub>3</sub>), 19.1 (C-2''', 6'''CH<sub>3</sub>).

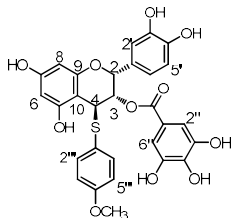

**JP-9:** UV  $\lambda_{\max}$  (MeOH) nm: 278, 216; mp. 152.5~154.3°C;  $[\alpha]_D^{25} -38.7^\circ$  (*c* 0.1 MeOH); HR-ESI-MS ( $m/z$  581.1117 [M+H]<sup>+</sup>, calcd, 581.1112); <sup>1</sup>H NMR (500 MHz, DMSO-*d*<sub>6</sub>)  $\delta$ : 7.56 (2H, d,  $J = 9.0$ , 3''', 5'''-H), 7.00 (2H, d,  $J = 9.0$ , 2''', 6'''-H), 6.82 (1H, d,  $J = 2.0$ , 2'-H), 6.72 (1H, dd,  $J = 8.5, 2.0$ , 6'-H), 6.69 (2H, s, 2'', 6''-H), 6.67 (1H, d,  $J = 8.5$ , 5'-H), 5.98 (1H, d,  $J = 2.0$ , 8-H), 5.86 (1H, d,  $J = 2.0$ , 6-H), 5.57 (1H, s, 3-H), 5.13 (1H, brs, 2-H), 4.32 (2H, d,  $J = 2.0$ , 4-H), 3.79 (3H, s, -OCH<sub>3</sub>); <sup>13</sup>C NMR (125 MHz, DMSO-*d*<sub>6</sub>)  $\delta$ : 164.6 (O-C-O), 159.2 (C-5), 158.3 (C-7), 157.3 (C-9), 155.5 (C-4'''), 145.4 (C-3'', 5''), 144.9 (C-3', 4'), 138.8 (C-4''), 134.4 (C-2''', 6'''), 128.5 (C-1'), 124.4 (C-1'''), 118.4 (C-1''), 117.4 (C-6'), 115.2 (C-5'), 114.8 (C-3''', 5'''), 114.0 (C-2'), 108.6 (C-2'', 6''), 96.6 (C-10), 96.0 (C-6), 94.1 (C-8), 72.6 (C-2), 70.6 (C-3), 55.2 (C-OCH<sub>3</sub>), 43.3 (C-4).

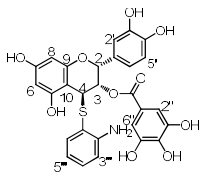

**JP-10:** UV  $\lambda_{\max}$  (MeOH) nm: 278, 216; mp. 157.2~160.3°C;  $[\alpha]_D^{25}$  -192.1° (c 0.1 MeOH); HR-ESI-MS ( $m/z$  588.0931  $[M+Na]^+$ , calcd, 588.0935);  $^1\text{H}$  NMR (500 MHz, DMSO- $d_6$ )  $\delta$ : 7.38 (1H, dd,  $J = 7.5, 1.5$ , 6'''-H), 7.14 (1H, m, 4'''-H), 6.88 (1H, d,  $J = 2.0$ , 2'-H), 6.77 (2H, m, 6', 5'''-H), 6.67 (1H, d,  $J = 8.5$ , 5'-H), 6.66 (2H, s, 2'', 6''-H), 6.57 (1H, m, 3'''-H), 6.03 (1H, d,  $J = 2.5$ , 8-H), 5.89 (1H, d,  $J = 2.5$ , 6-H), 5.71 (1H, d,  $J = 2.5$ , 3-H), 5.15 (1H, d,  $J = 2.5$ , 2-H), 4.19 (1H, d,  $J = 2.5$ , 4-H);  $^{13}\text{C}$  NMR (125 MHz, DMSO- $d_6$ )  $\delta$ : 164.3 (O-C-O), 158.3 (C-5), 157.3 (C-7), 155.8 (C-9), 150.6 (C-2'''), 145.3 (C-3'', 5''), 144.9 (C-3'), 144.8 (C-4'), 138.7 (C-4''), 136.7 (C-6'''), 130.6 (C-1'), 128.7 (C-4'''), 118.5 (C-1''), 117.4 (C-6'), 116.1 (C-1'''), 115.2 (C-5'), 114.4 (C-5'''), 114.0 (C-2'), 113.2 (C-3'''), 108.5 (C-2'', 6''), 96.7 (C-10), 96.0 (C-6), 94.4 (C-8), 72.6 (C-2), 70.4 (C-3), 40.7 (C-4).

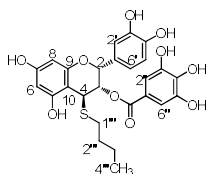

**JP-11:** UV  $\lambda_{\max}$  (MeOH) nm: 278, 216; mp. 150.6~152.1°C;  $[\alpha]_D^{25}$  -78.7° (c 0.1 MeOH); HR-ESI-MS ( $m/z$  531.1324  $[M+H]^+$ , calcd, 531.1319);  $^1\text{H}$  NMR (500 MHz, DMSO- $d_6$ )  $\delta$ : 6.86 (1H, d,  $J = 1.5$ , 2'-H), 6.79 (2H, s, 2'', 6''-H), 6.77 (1H, dd,  $J = 8.5, 1.5$ , 6'-H), 6.70 (1H, d,  $J = 8.5$ , 5'-H), 5.94 (1H, d,  $J = 2.0$ , 8-H), 5.84 (1H, d,  $J = 2.0$ , 6-H), 5.44 (1H, s, 3-H), 5.18 (1H, s, 2-H), 4.00 (1H, d,  $J = 2.0$ , 4-H), 2.82 (1H, s, 1'''-H), 1.70 (2H, m, 2'''-H), 1.48 (2H, m, 3'''-H), 0.94 (3H, t, 4'''-H);  $^{13}\text{C}$  NMR (125 MHz, DMSO- $d_6$ )  $\delta$ : 165.2 (O-C-O), 157.8 (C-5), 157.2 (C-7), 155.2 (C-9), 145.4 (C-3'', 5''), 144.9 (C-3', 4'), 138.8 (C-4''), 128.6 (C-1'), 118.5 (C-1''), 117.5 (C-6'), 115.3 (C-5'), 114.1 (C-2'), 108.6 (C-2'', 6''), 97.6 (C-10), 95.9 (C-6), 94.0 (C-8), 72.7 (C-2), 71.8 (C-3), 40.0 (C-4), 31.4 (C-1''', 2'''), 21.2 (C-3'''), 13.5 (C-4''').

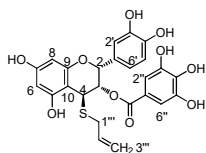

**JP-12:** UV  $\lambda_{\max}$  (MeOH) nm: 278, 216; mp. 143.8~146.0°C;  $[\alpha]_D^{25}$  -89.9° (c 0.1

MeOH); HR-ESI-MS ( $m/z$  515.1019  $[M+H]^+$ , calcd, 515.1006);  $^1\text{H}$  NMR (500 MHz, DMSO- $d_6$ )  $\delta$ : 6.86 (1H, d,  $J = 1.5$ , 2'-H), 6.79 (2H, s, 2'', 6''-H), 6.77 (1H, dd,  $J = 8.5$ , 1.5, 6'-H), 6.70 (1H, d,  $J = 8.5$ , 5'-H), 5.98 (1H, m, 2'''-H), 5.94 (1H, d,  $J = 2.0$ , 8-H), 5.84 (1H, d,  $J = 2.0$ , 6-H), 5.45 (1H, s, 3-H), 5.30 (1H, d,  $J = 18.0$ , 3'''-H), 5.25 (1H, s, 2-H), 5.11 (1H, d,  $J = 10.5$ , 3'''-H), 4.02 (1H, d,  $J = 2.0$ , 4-H), 3.49 (2H, m, 1'''-H);  $^{13}\text{C}$  NMR (125 MHz, DMSO- $d_6$ )  $\delta$ : 165.5 (O-C-O), 158.5 (C-5), 157.7 (C-7), 155.9 (C-9), 145.9 (C-3'', 5''), 145.4 (C-3', 4'), 139.4 (C-4''), 135.2 (C-2'''), 129.1 (C-1'), 119.0 (C-1''), 118.0 (C-3'''), 117.7 (C-6'), 115.7 (C-5'), 114.6 (C-2'), 109.1 (C-2'', 6''), 97.7 (C-10), 96.4 (C-6), 94.6 (C-8), 73.3 (C-2), 71.7 (C-3), 39.1 (C-4), 35.1 (C-1''').

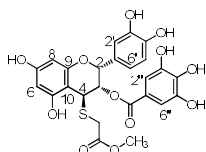

**JP-13:** UV  $\lambda_{\text{max}}$  (MeOH) nm: 278, 216; mp. 142.2~143.4°C;  $[\alpha]_D^{25} -75.1^\circ$  ( $c$  0.1 MeOH); HR-ESI-MS ( $m/z$  547.0913  $[M+H]^+$ , calcd, 547.0905);  $^1\text{H}$  NMR (500 MHz, DMSO- $d_6$ )  $\delta$ : 6.88 (1H, d,  $J = 1.5$ , 2'-H), 6.78 (2H, s, 2'', 6''-H), 6.77 (1H, dd,  $J = 8.0$ , 1.5, 6'-H), 6.69 (1H, d,  $J = 8.0$ , 5'-H), 5.95 (1H, d,  $J = 2.5$ , 8-H), 5.85 (1H, d,  $J = 2.5$ , 6-H), 5.44 (1H, s, 3-H), 5.27 (1H, s, 2-H), 4.14 (1H, d,  $J = 2.0$ , 4-H), 3.68 (3H, s, -O-C-O-CH<sub>3</sub>), 3.67 (2H, m, S-C-H);  $^{13}\text{C}$  NMR (125 MHz, DMSO- $d_6$ )  $\delta$ : 171.2 (O-C-OCH<sub>3</sub>), 165.5 (O-C-O), 158.8 (C-5), 157.8 (C-7), 155.9 (C-9), 145.9 (C-3'', 5''), 145.4 (C-3', 4'), 139.3 (C-4''), 129.0 (C-1'), 119.0 (C-1''), 118.1 (C-6'), 115.7 (C-5'), 114.7 (C-2'), 109.1 (C-2'', 6''), 97.1 (C-10), 96.4 (C-6), 94.6 (C-8), 73.1 (C-2), 71.5 (C-3), 52.7 (C-OCH<sub>3</sub>), 40.8 (C-4), 34.2 (S-C).

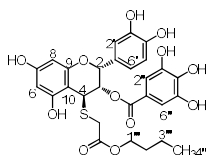

**JP-14:** UV  $\lambda_{\text{max}}$  (MeOH) nm: 278, 216; mp. 139.7~141.5°C;  $[\alpha]_D^{25} -115.5^\circ$  ( $c$  0.1 MeOH); HR-ESI-MS ( $m/z$  589.1386  $[M+H]^+$ , calcd, 589.1388);  $^1\text{H}$  NMR (500 MHz, DMSO- $d_6$ )  $\delta$ : 6.88 (1H, d,  $J = 2.0$ , 2'-H), 6.78 (2H, s, 2'', 6''-H), 6.77 (1H, dd,  $J = 8.0$ , 1.5, 6'-H), 6.69 (1H, d,  $J = 8.0$ , 5'-H), 5.95 (1H, d,  $J = 2.0$ , 8-H), 5.85 (1H, d,  $J = 2.0$ ,

6-H), 5.44 (1H, s, 3-H), 5.28 (1H, s, 2-H), 4.17 (1H, d,  $J = 2.0$ , 4-H), 4.10 (2H, m, 1'''-H), 3.65 (2H, m, S-C-H), 1.57 (2H, m, 2'''-H), 1.32 (2H, m, 3'''-H), 0.85 (3H, t, 4'''-H);  $^{13}\text{C}$  NMR (125 MHz, DMSO- $d_6$ )  $\delta$ : 170.7 (O-C-OCH<sub>2</sub>), 165.4 (O-C-O), 158.8 (C-5), 157.9 (C-7), 156.0 (C-9), 145.9 (C-3'', 5''), 145.4 (C-3', 4'), 139.3 (C-4''), 129.0 (C-1'), 119.0 (C-1''), 118.1 (C-6'), 115.7 (C-5'), 114.7 (C-2'), 109.1 (C-2'', 6''), 97.1 (C-10), 96.4 (C-6), 94.5 (C-8), 73.1 (C-2), 71.4 (C-3), 65.1 (C-1'''), 40.0 (C-4), 34.2 (S-C), 30.5 (C-2'''), 19.0 (C-3'''), 14.0 (C-4''').

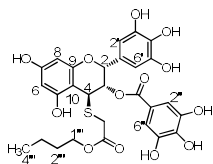

**JP-15:** UV  $\lambda_{\text{max}}$  (MeOH) nm: 278, 216; mp. 138.9~140.1°C;  $[\alpha]_D^{25} -102.3^\circ$  (*c* 0.1 MeOH); HR-ESI-MS ( $m/z$  605.1339 [M+H]<sup>+</sup>, calcd, 605.1337);  $^1\text{H}$  NMR (500 MHz, DMSO- $d_6$ )  $\delta$ : 6.78 (2H, s, 2'', 6''-H), 6.43 (2H, s, 2', 6'-H), 5.95 (1H, d,  $J = 2.0$ , 8-H), 5.85 (1H, d,  $J = 2.0$ , 6-H), 5.35 (1H, s, 3-H), 5.30 (1H, s, 2-H), 4.15 (1H, d,  $J = 1.5$ , 4-H), 4.10 (2H, m, 1'''-H), 3.63 (2H, m, S-C-H), 1.57 (2H, m, 2'''-H), 1.33 (2H, m, 3'''-H), 0.85 (3H, t, 4'''-H);  $^{13}\text{C}$  NMR (125 MHz, DMSO- $d_6$ )  $\delta$ : 170.7 (O-C-OCH<sub>2</sub>), 165.5 (O-C-O), 158.8 (C-5), 157.9 (C-7), 156.0 (C-9), 146.3 (C-3', 5'), 145.9 (C-3'', 5''), 139.3 (C-4''), 133.1 (C-4'), 128.2 (C-1'), 119.1 (C-1''), 109.1 (C-2'', 6''), 106.0 (C-2', 6'), 97.2 (C-10), 96.4 (C-6), 94.6 (C-8), 73.2 (C-2), 71.3 (C-3), 65.1 (C-1'''), 40.0 (C-4), 34.2 (S-C), 30.5 (C-2'''), 19.1 (C-3'''), 14.0 (C-4''').

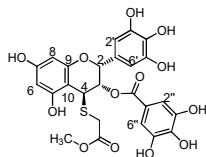

**JP-16:** UV  $\lambda_{\text{max}}$  (MeOH) nm: 278, 216; mp. 124.7~127.0°C;  $[\alpha]_D^{25} -94.5^\circ$  (*c* 0.1 MeOH); HR-ESI-MS ( $m/z$  563.0864 [M+H]<sup>+</sup>, calcd, 563.0867);  $^1\text{H}$  NMR (500 MHz, DMSO- $d_6$ )  $\delta$ : 6.78 (2H, s, 2'', 6''-H), 6.43 (2H, s, 2', 6'-H), 5.95 (1H, d,  $J = 2.0$ , 8-H), 5.85 (1H, d,  $J = 2.0$ , 6-H), 5.34 (1H, s, 3-H), 5.29 (1H, s, 2-H), 4.11 (1H, d,  $J = 2.0$ , 4-H), 3.69 (3H, m, -O-C-O-CH<sub>3</sub>), 3.63 (2H, m, S-CH<sub>2</sub>);  $^{13}\text{C}$  NMR (125 MHz,

DMSO-*d*<sub>6</sub>)  $\delta$ : 171.1 (O-C-OCH<sub>3</sub>), 165.5 (O-C-O), 158.8 (C-5), 157.8 (C-7), 155.9 (C-9), 146.3 (C-3', 5'), 145.9 (C-3'', 5''), 139.3 (C-4''), 133.1 (C-4'), 128.2 (C-1'), 119.1 (C-1''), 109.2 (C-2'', 6''), 105.7 (C-2', 6'), 97.3 (C-10), 96.4 (C-6), 94.6 (C-8), 73.2 (C-2), 71.5 (C-3), 52.7 (C-OCH<sub>3</sub>), 40.0 (C-4), 34.2 (S-C).

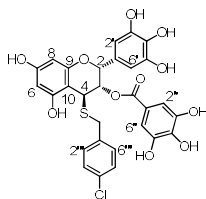

**JP-17:** UV  $\lambda_{\max}$  (MeOH) nm: 278, 216; mp. 145.1~147.4°C;  $[\alpha]_D^{25}$  -123.6° (*c* 0.1 MeOH); HR-ESI-MS (*m/z* 615.0727 [M+H]<sup>+</sup>, calcd, 615.0722); <sup>1</sup>H NMR (500 MHz, DMSO-*d*<sub>6</sub>)  $\delta$ : 7.48 (2H, d, *J* = 8.5, 3''', 5'''-H), 7.39 (2H, d, *J* = 8.5, 2''', 6'''-H), 6.79 (2H, s, 2'', 6''-H), 6.41 (2H, s, 2', 6'-H), 5.91 (1H, d, *J* = 2.5, 8-H), 5.83 (1H, d, *J* = 2.5, 6-H), 5.36 (1H, s, 3-H), 5.26(1H, s, 2-H), 4.07 (2H, m, S-CH<sub>2</sub>), 4.00 (1H, s, 4-H); <sup>13</sup>C NMR (125 MHz, DMSO-*d*<sub>6</sub>)  $\delta$ : 165.7 (O-C-O), 158.5 (C-5), 157.7 (C-7), 155.9 (C-9), 146.3 (C-3', 5'), 145.9 (C-3'', 5''), 139.4 (C-4''), 138.2 (C-1'''), 133.1 (C-4'), 131.9 (C-4'''), 131.2 (C-2''', 6'''), 128.7 (C-3''', 5'''), 128.3 (C-1'), 119.1 (C-1''), 109.2 (C-2'', 6''), 105.9 (C-2', 6'), 97.5 (C-10), 96.4 (C-6), 94.5 (C-8), 73.3 (C-2), 71.7 (C-3), 40.0 (C-4), 35.4 (S-C).

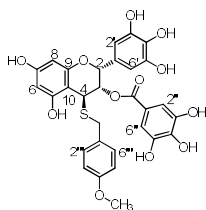

**JP-18:** UV  $\lambda_{\max}$  (MeOH) nm: 278, 216; mp. 135.4~136.7°C;  $[\alpha]_D^{25}$  -76.6° (*c* 0.1 MeOH); HR-ESI-MS (*m/z* 611.1214 [M+H]<sup>+</sup>, calcd, 611.1218); <sup>1</sup>H NMR (500 MHz, DMSO-*d*<sub>6</sub>)  $\delta$ : 7.36 (2H, d, *J* = 8.5, 2''', 6'''-H), 6.88 (2H, d, *J* = 8.5, 3''', 5'''-H), 6.79 (2H, s, 2'', 6''-H), 6.40 (2H, s, 2', 6'-H), 5.92 (1H, d, *J* = 2.0, 8-H), 5.83 (1H, d, *J* = 2.0, 6-H), 5.37 (1H, s, 3-H), 5.29 (1H, s, 2-H), 4.03 (2H, d, *J* = 2.0, 4-H), 4.01 (2H, m, S-CH<sub>2</sub>), 3.75 (3H, s, -OCH<sub>3</sub>); <sup>13</sup>C NMR (125 MHz, DMSO-*d*<sub>6</sub>)  $\delta$ : 165.6 (O-C-O), 158.7 (C-5), 158.5 (C-4'''), 157.7 (C-7), 155.9 (C-9), 146.3 (C-3', 5'), 145.9 (C-3'', 5''),

139.4 (C-4''), 133.0 (C-4'), 130.7 (C-1'''), 130.5 (C-2''', 6'''), 128.4 (C-1'), 119.2 (C-1''), 114.2 (C-3''', 5'''), 109.2 (C-2'', 6''), 105.9 (C-2', 6'), 97.7 (C-10), 96.4 (C-6), 94.5 (C-8), 73.3 (C-2), 71.7 (C-3), 55.5 (C-OCH<sub>3</sub>), 40.0 (C-4), 35.7 (S-C).

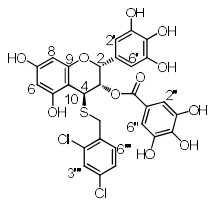

**JP-19:** UV  $\lambda_{\max}$  (MeOH) nm: 278, 216; mp. 145.3~146.7°C;  $[\alpha]_D^{25}$  -57.1° (*c* 0.1 MeOH); HR-ESI-MS (*m/z* 649.0337 [M+H]<sup>+</sup>, calcd, 649.0333); <sup>1</sup>H NMR (500 MHz, DMSO-*d*<sub>6</sub>)  $\delta$ : 7.65 (1H, d, *J* = 2.5, 3'''-H), 7.62 (1H, dd, *J* = 8.5, 2.5, 5'''-H), 7.41 (1H, d, *J* = 8.5, 6'''-H), 6.80 (2H, s, 2'', 6''-H), 6.41 (2H, s, 2', 6'-H), 5.91 (1H, d, *J* = 2.0, 8-H), 5.83 (1H, d, *J* = 2.0, 6-H), 5.36 (1H, s, 3-H), 5.30 (1H, s, 2-H), 4.13 (2H, m, S-CH<sub>2</sub>), 4.05 (1H, d, *J* = 2.0, 4-H); <sup>13</sup>C NMR (125 MHz, DMSO-*d*<sub>6</sub>)  $\delta$ : 165.8 (O-C-O), 158.6 (C-5), 157.7 (C-7), 155.9 (C-9), 146.3 (C-3', 5'), 145.9 (C-3'', 5''), 139.4 (C-4''), 135.7 (C-2'''), 134.6 (C-4'''), 133.1 (C-6'''), 132.9 (C-4'), 132.7 (C-1'), 129.5 (C-3'''), 128.3 (C-1'''), 127.8 (C-5'''), 119.1 (C-1''), 109.2 (C-2'', 6''), 105.9 (C-2', 6'), 97.3 (C-10), 96.4 (C-6), 94.5 (C-8), 73.4 (C-2), 71.7 (C-3), 40.9 (C-4), 33.5 (S-C).

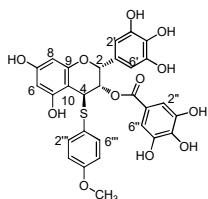

**JP-20:** UV  $\lambda_{\max}$  (MeOH) nm: 278, 216; mp. 129.3~131.0°C;  $[\alpha]_D^{25}$  -41.5° (*c* 0.1 MeOH); HR-ESI-MS (*m/z* 597.1072 [M+H]<sup>+</sup>, calcd, 597.1061); <sup>1</sup>H NMR (500 MHz, DMSO-*d*<sub>6</sub>)  $\delta$ : 7.56 (2H, d, *J* = 8.5, 3''', 5'''-H), 7.02 (2H, d, *J* = 8.5, 2''', 6'''-H), 6.70 (2H, s, 2'', 6''-H), 6.38 (2H, s, 2', 6'-H), 5.99 (1H, d, *J* = 2.5, 8-H), 5.87 (1H, d, *J* = 2.5, 6-H), 5.51 (1H, s, 3-H), 5.17 (1H, s, 2-H), 4.32 (1H, d, *J* = 2.0, 4-H), 3.81 (3H, s, -OCH<sub>3</sub>); <sup>13</sup>C NMR (125 MHz, DMSO-*d*<sub>6</sub>)  $\delta$ : 164.6 (O-C-O), 159.2 (C-5), 158.3 (C-7), 157.3 (C-9), 155.5 (C-4'''), 145.8 (C-3', 5'), 145.3 (C-3'', 5''), 138.8 (C-4''), 134.2 (C-2''', 6'''), 132.5 (C-4'), 127.8 (C-1'), 124.5 (C-1'''), 118.5 (C-1''), 114.9 (C-3''', 5'''),



108.7 (C-2'', 6''), 105.2 (C-2', 6'), 96.7 (C-10), 96.0 (C-6), 94.1 (C-8), 72.6 (C-2), 70.5 (C-3), 55.2 (C-OCH<sub>3</sub>), 43.4 (S-C).

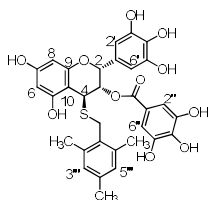

**JP-21:** UV  $\lambda_{\max}$  (MeOH) nm: 278, 216; mp. 139.9~141.3°C;  $[\alpha]_D^{25}$  -9.4° (*c* 0.1 MeOH); HR-ESI-MS (*m/z* 623.1583 [M+H]<sup>+</sup>, calcd, 623.1582); <sup>1</sup>H NMR (500 MHz, DMSO-*d*<sub>6</sub>)  $\delta$ : 6.85 (2H, s, 3''', 5'''-H), 6.80 (2H, s, 2'', 6''-H), 6.43 (2H, s, 2', 6'-H), 5.95 (1H, d, *J* = 2.0, 8-H), 5.83 (1H, d, *J* = 2.0, 6-H), 5.35 (2H, s, 3, 2-H), 4.11 (1H, s, 4-H), 4.09 (2H, s, S-CH<sub>2</sub>), 2.42 (6H, s, 2''', 6'''-CH<sub>3</sub>), 2.20 (3H, s, 4'''-CH<sub>3</sub>); <sup>13</sup>C NMR (125 MHz, DMSO-*d*<sub>6</sub>)  $\delta$ : 165.2 (O-C-O), 158.0 (C-5), 157.3 (C-7), 155.2 (C-9), 145.8 (C-3', 5'), 145.4 (C-3'', 5''), 138.9 (C-4''), 136.5 (C-2''', 6'''), 135.9 (C-1'''), 132.6 (C-4'''), 130.2 (C-4'), 128.7 (C-3''', 5'''), 127.9 (C-1'), 118.6 (C-1''), 108.7 (C-2'', 6''), 105.3 (C-2', 6'), 97.3 (C-10), 96.0 (C-6), 94.0 (C-8), 73.0 (C-2), 71.6 (C-3), 40.7 (C-4), 31.0 (S-C), 20.5 (4'''-CH<sub>3</sub>), 19.1 (2''', 6'''-CH<sub>3</sub>).

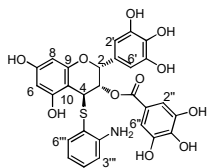

**JP-22:** UV  $\lambda_{\max}$  (MeOH) nm: 278, 216; mp. 159.7~162.1°C;  $[\alpha]_D^{25}$  -189.3° (*c* 0.1 MeOH); HR-ESI-MS (*m/z* 604.0887 [M+H]<sup>+</sup>, calcd, 604.0884); <sup>1</sup>H NMR (500 MHz, DMSO-*d*<sub>6</sub>)  $\delta$ : 7.35 (1H, d, *J* = 7.5, 6'''-H), 7.14 (1H, m, 4'''-H), 6.76 (1H, d, *J* = 7.5, 5'''-H), 6.63 (2H, s, 2'', 6''-H), 6.57 (1H, m, 3'''-H), 6.42 (2H, s, 2', 6'-H), 6.01 (1H, d, *J* = 1.0, 8-H), 5.88 (1H, d, *J* = 1.0, 6-H), 5.61 (1H, s, 3-H), 5.16 (1H, s, 2-H), 4.16 (1H, s, 4-H); <sup>13</sup>C NMR (125 MHz, DMSO-*d*<sub>6</sub>)  $\delta$ : 164.2 (O-C-O), 158.3 (C-5), 157.3 (C-7), 155.8 (C-9), 150.6 (C-2'''), 145.8 (C-3', 5'), 145.3 (C-3'', 5''), 138.7 (C-4''), 136.6 (C-6'''), 132.4 (C-4'), 130.6 (C-1'), 127.9 (C-4'''), 118.6 (C-1''), 116.0 (C-1'''), 114.4 (C-5'''), 113.2 (C-3'''), 108.6 (C-2'', 6''), 105.2 (C-2', 6'), 96.8 (C-10),

96.0 (C-6), 94.4 (C-8), 72.6 (C-2), 70.4 (C-3), 40.7 (C-4).

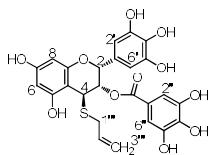

**JP-23:** UV  $\lambda_{\max}$  (MeOH) nm: 278, 216; mp. 140.3~142.1°C;  $[\alpha]_D^{25}$  -101.6° (*c* 0.1 MeOH); HR-ESI-MS (*m/z* 531.0949  $[M+H]^+$ , calcd, 531.0956);  $^1\text{H}$  NMR (500 MHz, DMSO-*d*<sub>6</sub>)  $\delta$ : 6.76 (2H, s, 2'', 6''-H), 6.40 (2H, s, 2', 6'-H), 6.01 (1H, m, 2'''-H), 5.92 (1H, d, *J* = 2.0, 8-H), 5.82 (1H, d, *J* = 2.0, 6-H), 5.36 (1H, s, 3-H), 5.31 (1H, d, *J* = 18.0, 3'''-H), 5.25 (1H, s, 2-H), 5.11 (1H, d, *J* = 10.5, 3'''-H), 3.97 (1H, s, 4-H), 3.46 (2H, m, 1'''-H);  $^{13}\text{C}$  NMR (125 MHz, DMSO-*d*<sub>6</sub>)  $\delta$ : 165.0 (O-C-O), 157.9 (C-5), 157.2 (C-7), 155.4 (C-9), 145.8 (C-3', 5'), 145.4 (C-3'', 5''), 138.8 (C-4''), 134.7 (C-2'''), 132.5 (C-4'), 127.8 (C-1'), 118.6 (C-1''), 117.2 (C-3'''), 108.7 (C-2'', 6''), 105.3 (C-2', 6'), 97.3 (C-10), 95.9 (C-6), 94.0 (C-8), 72.7 (C-2), 71.1 (C-3), 38.7 (C-4), 34.6 (S-C).

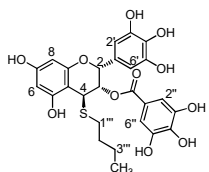

**JP-24:** UV  $\lambda_{\max}$  (MeOH) nm: 278, 216; mp. 145.6~147.4°C;  $[\alpha]_D^{25}$  -88.3° (*c* 0.1 MeOH); HR-ESI-MS (*m/z* 547.1269  $[M+H]^+$ , calcd, 547.1269);  $^1\text{H}$  NMR (500 MHz, DMSO-*d*<sub>6</sub>)  $\delta$ : 6.77 (2H, s, 2'', 6''-H), 6.40 (2H, s, 2', 6'-H), 5.92 (1H, d, *J* = 2.0, 8-H), 5.82 (1H, d, *J* = 2.0, 6-H), 5.34 (1H, s, 3-H), 5.18 (1H, s, 2-H), 3.95 (1H, s, 4-H), 2.81 (2H, m, 1'''-H), 1.69 (2H, m, 2'''-H), 1.46 (2H, m, 3'''-H), 0.92 (3H, t, 4'''-H);  $^{13}\text{C}$  NMR (125 MHz, DMSO-*d*<sub>6</sub>)  $\delta$ : 165.2 (O-C-O), 157.8 (C-5), 157.2 (C-7), 155.2 (C-9), 145.8 (C-3', 5'), 145.4 (C-3'', 5''), 138.8 (C-4''), 132.5 (C-4'), 127.9 (C-1'), 118.6 (C-1''), 108.7 (C-2'', 6''), 105.2 (C-2', 6'), 97.7 (C-10), 95.9 (C-6), 94.0 (C-8), 72.6 (C-2), 71.7 (C-3), 40.0 (C-4), 31.4 (C-1''', 2'''), 21.2 (C-3'''), 13.5 (C-4''').

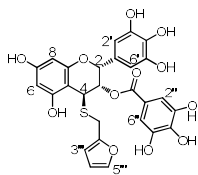

**JP-25:** UV  $\lambda_{\max}$  (MeOH) nm: 278, 216; mp. 162.1~163.4°C;  $[\alpha]_D^{25}$  -112.3° (*c* 0.1 MeOH); HR-ESI-MS ( $m/z$  571.0905  $[M+H]^+$ , calcd, 571.0905);  $^1\text{H}$  NMR (500 MHz, DMSO- $d_6$ )  $\delta$ : 7.60 (1H, s, 5'''-H), 6.78 (2H, s, 2'', 6''-H), 6.39 (2H, s, 2', 6'-H), 6.38 (2H, m, 3''', 4'''-H), 5.91 (1H, d,  $J = 1.8$ , 8-H), 5.82 (1H, d,  $J = 1.8$ , 6-H), 5.33 (1H, s, 3-H), 5.28 (1H, s, 2-H), 4.09 (1H, d,  $J = 1.2$ , 4-H), 4.05 (2H, m, S-C-H);  $^{13}\text{C}$  NMR (125 MHz, DMSO- $d_6$ )  $\delta$ : 165.2 (O-C-O), 158.1 (C-5), 157.2 (C-7), 155.5 (C-9), 151.5 (C-2'''), 145.8 (C-3', 5'), 142.4 (C-3'', 5''), 138.9 (C-5'''), 132.5 (C-4''), 127.8 (C-1'), 118.6 (C-1''), 110.6 (C-4'''), 108.7 (C-2'', 6''), 107.6 (C-2', 6'), 105.4 (C-3'''), 96.9 (C-10), 95.9 (C-6), 94.0 (C-8), 72.7 (C-2), 71.0 (C-3), 40.0 (C-4), 27.9 (S-C).

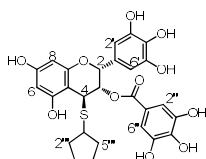

**JP-26:** UV  $\lambda_{\max}$  (MeOH) nm: 278, 216; mp. 175.5~176.2°C;  $[\alpha]_D^{25}$  -75.5° (*c* 0.1 MeOH); HR-ESI-MS ( $m/z$  559.1267  $[M+H]^+$ , calcd, 559.1269);  $^1\text{H}$  NMR (500 MHz, DMSO- $d_6$ )  $\delta$ : 6.77 (2H, s, 2'', 6''-H), 6.40 (2H, s, 2', 6'-H), 5.91 (1H, d,  $J = 2.0$ , 8-H), 5.82 (1H, d,  $J = 2.0$ , 6-H), 5.33 (1H, s, 3-H), 5.24 (1H, s, 2-H), 3.99 (1H, d,  $J = 2.0$ , 4-H), 3.51 (1H, m, 1'''-H), 2.09 (2H, m, 2''', 5'''-H), 1.74 (2H, m, 2''', 5'''-H), 1.55 (4H, m, 3''', 4'''-H);  $^{13}\text{C}$  NMR (125 MHz, DMSO- $d_6$ )  $\delta$ : 165.2 (O-C-O), 157.7 (C-5), 157.0 (C-7), 155.0 (C-9), 145.8 (C-3', 5'), 145.4 (C-3'', 5''), 138.8 (C-4''), 132.5 (C-4'), 127.9 (C-1'), 118.6 (C-1''), 108.7 (C-2'', 6''), 105.2 (C-2', 6'), 97.9 (C-10), 95.9 (C-6), 94.0 (C-8), 72.7 (C-2), 71.9 (C-3), 44.3 (S-C), 40.0 (C-4), 33.8 (C-2'''), 33.5 (C-5'''), 24.6 (C-3'''), 24.2 (C-4''').

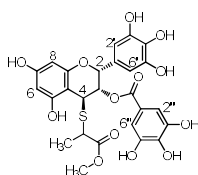

**JP-27:** UV  $\lambda_{\max}$  (MeOH) nm: 278, 216; mp. 143.2~145.1°C;  $[\alpha]_D^{25}$  -92.7° (*c* 0.1 MeOH); HR-ESI-MS ( $m/z$  577.1024  $[M+H]^+$ , calcd, 577.101);  $^1\text{H}$  NMR (500 MHz, DMSO- $d_6$ )  $\delta$ : 6.77 (2H, d,  $J = 2.5$ , 2'', 6''-H), 6.38 (2H, d,  $J = 2.5$ , 2', 6'-H), 5.92 (1H, d,  $J = 2.0$ , 8-H), 5.82 (1H, d,  $J = 2.0$ , 6-H), 5.29 (1H, s, 3-H), 5.23 (1H, s, 2-H), 4.15 (1H, s, 4-H), 3.85 (1H, m, S-C-H), 3.69 (3H, s, -OCH<sub>3</sub>), 1.48 (3H, d,  $J = 7.0$ , -CH<sub>3</sub>);  $^{13}\text{C}$  NMR (125 MHz, DMSO- $d_6$ )  $\delta$ : 172.9 (O-C-OCH<sub>3</sub>), 164.9 (O-C-O), 158.2 (C-5), 157.2 (C-7), 155.5 (C-9), 145.8 (C-3', 5'), 145.4 (C-3'', 5''), 138.9 (C-4''), 132.6 (C-4'), 127.9 (C-1'), 118.6 (C-1''), 108.7 (C-2'', 6''), 105.3 (C-2', 6'), 96.5 (C-10), 95.9 (C-6), 94.0 (C-8), 72.8 (C-2), 71.5 (C-3), 52.0 (C-OCH<sub>3</sub>), 40.8 (S-C), 40.0 (C-4), 17.5 (C-CH<sub>3</sub>).

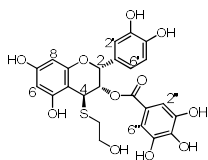

**JP-28:** UV  $\lambda_{\max}$  (MeOH) nm: 278, 216; mp. 140.4~142.8°C; HR-ESI-MS ( $m/z$  519.0963  $[M+H]^+$ , calcd, 519.0956);  $^1\text{H}$  NMR (500 MHz, DMSO- $d_6$ )  $\delta$ : 6.86 (1H, d,  $J = 2.0$ , 2'-H), 6.78 (2H, s, 2'', 6''-H), 6.77 (1H, dd,  $J = 8.0$ , 2.0, 6'-H), 6.69 (1H, d,  $J = 8.0$ , 5'-H), 5.94 (1H, d,  $J = 2.5$ , 8-H), 5.83 (1H, d,  $J = 2.5$ , 6-H), 5.40 (1H, brs, 3-H), 5.18 (1H, brs, 2-H), 3.98 (1H, d,  $J = 2.0$ , 4-H), 3.70 (2H, t, -CH<sub>2</sub>-OH), 2.89 (2H, m, S-CH<sub>2</sub>);  $^{13}\text{C}$  NMR (125 MHz, DMSO- $d_6$ )  $\delta$ : 165.2 (O-C-O), 157.9 (C-5), 157.2 (C-7), 155.1 (C-9), 145.4 (C-3'', 5''), 144.9 (C-3', 4'), 138.9 (C-4''), 128.6 (C-1'), 118.5 (C-1''), 117.5 (C-6'), 115.2 (C-5'), 114.1 (C-2'), 108.6 (C-2'', 6''), 97.7 (C-10), 96.0 (C-6), 94.1 (C-8), 72.6 (C-2), 72.1 (C-3), 61.0 (C-OH), 41.1 (C-4), 34.8 (S-C).

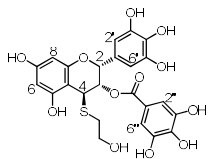

**JP-29:** UV  $\lambda_{\max}$  (MeOH) nm: 278, 216; mp. 142.1~143.5°C; HR-ESI-MS ( $m/z$  535.0913  $[M+H]^+$ , calcd, 535.0905);  $^1\text{H}$  NMR (500 MHz, DMSO- $d_6$ )  $\delta$ : 6.77 (2H, s, 2'', 6''-H), 6.41 (2H, s, 2', 6'-H), 5.93 (1H, s, 8-H), 5.83 (1H, s, 6-H), 5.31 (1H, s, 3-H), 5.18 (1H, s, 2-H), 3.93 (1H, s, 4-H), 3.70 (2H, m, C-OH), 2.87 (2H, m, S-CH<sub>2</sub>);  $^{13}\text{C}$

NMR (125 MHz, DMSO-*d*<sub>6</sub>)  $\delta$ : 165.2 (O-C-O), 157.9 (C-5), 157.2 (C-7), 155.1 (C-9), 145.8 (C-3', 5'), 145.4 (C-3'', 5''), 138.9 (C-4''), 132.5 (C-4'), 127.8 (C-1'), 118.6 (C-1''), 108.7 (C-2'', 6''), 105.3 (C-2', 6'), 97.7 (C-10), 96.0 (C-6), 94.1 (C-8), 72.6 (C-2), 72.0 (C-3), 61.1 (C-OH), 41.1 (C-4), 34.7 (S-C).

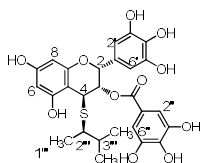

**JP-30:**  $[\alpha]_D^{25}$  -65.2° (*c* 0.1 MeOH); HR-ESI-MS (*m/z* 561.1442 [M+H]<sup>+</sup>, calcd, 561.1425); <sup>1</sup>H NMR (500 MHz, DMSO-*d*<sub>6</sub>)  $\delta$ : 6.74 (2H, s, 2'', 6''-H), 6.37 (2H, s, 2', 6'-H), 5.89 (1H, d, *J* = 2.0, 8-H), 5.80 (1H, d, *J* = 2.0, 6-H), 5.35 (1H, s, 3-H), 5.12 (1H, s, 2-H), 3.91 (1H, d, *J* = 2.0, 4-H), 3.07 (1H, m, 2'''-H), 1.87 (1H, m, 3'''-H), 1.38 (3H, d, *J* = 3.0, 1'''-H), 1.01 (3H, d, *J* = 6.5, 3'''-CH<sub>3</sub>), 0.93 (3H, d, *J* = 6.5, 3'''-CH<sub>3</sub>); <sup>13</sup>C NMR (125 MHz, DMSO-*d*<sub>6</sub>)  $\delta$ : 165.4 (O-C-O), 157.9 (C-5), 157.2 (C-7), 155.3 (C-9), 145.9 (C-3', 5'), 145.5 (C-3'', 5''), 139.0 (C-4''), 132.6 (C-4'), 128.1 (C-1'), 118.5 (C-1''), 108.8 (C-2'', 6''), 105.3 (C-2', 6'), 97.9 (C-10), 96.0 (C-6), 94.1 (C-8), 72.8 (C-2), 72.0 (C-3), 47.9 (C-2'''), 40.4 (C-4), 32.8 (C-3'''), 19.7 (C-1'''), 19.3 (C-3'''-CH<sub>3</sub>), 19.1 (C-3'''-CH<sub>3</sub>).

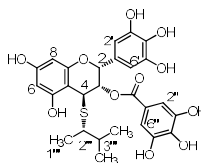

**JP-31:**  $[\alpha]_D^{25}$  -49.1° (*c* 0.1 MeOH); HR-ESI-MS (*m/z* 561.143 [M+H]<sup>+</sup>, calcd, 561.1425); <sup>1</sup>H NMR (500 MHz, DMSO-*d*<sub>6</sub>)  $\delta$ : 6.75 (2H, s, 2'', 6''-H), 6.39 (2H, s, 2', 6'-H), 5.90 (1H, d, *J* = 2.0, 8-H), 5.80 (1H, d, *J* = 2.0, 6-H), 5.37 (1H, s, 3-H), 5.15 (1H, s, 2-H), 3.97 (1H, d, *J* = 2.0, 4-H), 3.15 (1H, m, 2'''-H), 2.00 (1H, m, 3'''-H), 1.30 (3H, d, *J* = 3.0, 1'''-H), 1.00 (3H, d, *J* = 6.5, 3'''-CH<sub>3</sub>), 0.96 (3H, d, *J* = 6.5, 3'''-CH<sub>3</sub>); <sup>13</sup>C NMR (125 MHz, DMSO-*d*<sub>6</sub>)  $\delta$ : 165.4 (O-C-O), 157.9 (C-5), 157.3 (C-7), 155.3 (C-9), 145.9 (C-3', 5'), 145.5 (C-3'', 5''), 139.0 (C-4''), 132.6 (C-4'), 128.1 (C-1'), 118.7 (C-1''), 108.8 (C-2'', 6''), 105.3 (C-2', 6'), 98.0 (C-10), 96.0 (C-6), 94.1 (C-8),

72.6 (C-2), 72.4 (C-3), 47.7 (C-2'''), 40.4 (C-4), 32.8 (C-3'''), 19.3 (C-1'''), 19.0 (C-3'''-CH<sub>3</sub>), 18.6 (C-3'''-CH<sub>3</sub>).

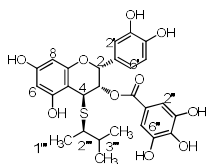

**JP-32:** UV  $\lambda_{\max}$  (MeOH) nm: 278, 216; mp. 144.4~146.0°C;  $[\alpha]_D^{25}$  -90.7° (c 0.1 MeOH); HR-ESI-MS ( $m/z$  545.1476 [M+H]<sup>+</sup>, calcd, 545.1476); <sup>1</sup>H NMR (500 MHz, DMSO-*d*<sub>6</sub>)  $\delta$ : 6.84 (1H, d,  $J$  = 2.0, 2'-H), 6.77 (2H, s, 2'', 6''-H), 6.75 (1H, dd,  $J$  = 8.0, 2.0, 6'-H), 6.74 (1H, dd,  $J$  = 8.0, 5'-H), 5.93 (1H, d,  $J$  = 2.0, 8-H), 5.83 (1H, d,  $J$  = 2.0, 6-H), 5.46 (1H, s, 3-H), 5.12 (1H, s, 2-H), 3.97 (1H, d,  $J$  = 2.0, 4-H), 3.09 (1H, m, 2'''-H), 1.89 (1H, m, 3'''-H), 1.41 (3H, d,  $J$  = 7.0, 1'''-H), 1.03 (3H, d,  $J$  = 6.5, 3'''-CH<sub>3</sub>), 0.96 (3H, d,  $J$  = 6.5, 3'''-CH<sub>3</sub>); <sup>13</sup>C NMR (125 MHz, DMSO-*d*<sub>6</sub>)  $\delta$ : 165.2 (O-C-O), 157.8 (C-5), 157.1 (C-7), 155.2 (C-9), 145.4 (C-3'', 5''), 144.9 (C-3', 4'), 138.9 (C-4''), 128.7 (C-1'), 118.5 (C-1''), 117.4 (C-6'), 115.3 (C-5'), 114.0 (C-2'), 108.6 (C-2'', 6''), 97.7 (C-10), 95.9 (C-6), 94.0 (C-8), 72.8 (C-2), 72.0 (C-3), 47.7 (C-2'''), 38.1 (C-4), 32.6 (C-3'''), 19.5 (C-1'''), 19.2 (C-3'''-CH<sub>3</sub>), 19.0 (C-3'''-CH<sub>3</sub>).

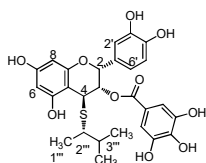

**JP-33:** UV  $\lambda_{\max}$  (MeOH) nm: 278, 216; mp. 143.0~144.9°C;  $[\alpha]_D^{25}$  -102.3° (c 0.1 MeOH); HR-ESI-MS ( $m/z$  545.1486 [M+H]<sup>+</sup>, calcd, 545.1476); <sup>1</sup>H NMR (500 MHz, DMSO-*d*<sub>6</sub>)  $\delta$ : 6.82 (1H, d,  $J$  = 2.0, 2'-H), 6.74 (2H, s, 2'', 6''-H), 6.72 (1H, dd,  $J$  = 8.0, 2.0, 6'-H), 6.66 (1H, dd,  $J$  = 8.0, 5'-H), 5.89 (1H, d,  $J$  = 2.0, 8-H), 5.79 (1H, d,  $J$  = 2.0, 6-H), 5.43 (1H, s, 3-H), 5.11 (1H, s, 2-H), 3.98 (1H, d,  $J$  = 2.0, 4-H), 3.14 (1H, m, 2'''-H), 2.00 (1H, m, 3'''-H), 1.28 (3H, d,  $J$  = 6.5, 1'''-H), 1.00 (3H, d,  $J$  = 6.5, 3'''-CH<sub>3</sub>), 0.94 (3H, d,  $J$  = 6.5, 3'''-CH<sub>3</sub>); <sup>13</sup>C NMR (125 MHz, DMSO-*d*<sub>6</sub>)  $\delta$ : 165.3 (O-C-O), 157.8 (C-5), 157.3 (C-7), 155.2 (C-9), 145.5 (C-3'', 5''), 145.0 (C-3'), 144.9 (C-4'), 138.9 (C-4''), 128.7 (C-1'), 118.5 (C-1''), 117.4 (C-6'), 115.3 (C-5'), 114.0

(C-2'), 108.7 (C-2'', 6''), 97.8 (C-10), 96.0 (C-6), 94.0 (C-8), 72.6 (C-2), 72.4 (C-3), 47.5 (C-2'''), 40.4 (C-4), 32.7 (C-3'''), 19.3 (C-1'''), 18.9 (C-3'''-CH<sub>3</sub>), 18.5 (C-3'''-CH<sub>3</sub>).

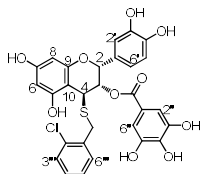

**JP-34:** UV  $\lambda_{\max}$  (MeOH) nm: 278, 216; mp. 145.8~147.9°C;  $[\alpha]_D^{25}$  -99.3° (c 0.1 MeOH); HR-ESI-MS ( $m/z$  599.0791 [M+H]<sup>+</sup>, calcd, 599.0773); <sup>1</sup>H NMR (500 MHz, DMSO-*d*<sub>6</sub>)  $\delta$ : 7.59 (1H, m, 3'''-H), 7.48 (1H, m, 5'''-H), 7.31 (2H, m, 4''', 6'''-H), 6.83 (1H, s, 2'-H), 6.80 (2H, s, 2'', 6''-H), 6.68 (2H, m, 5', 6'-H), 5.91 (1H, d,  $J = 2.0$ , 8-H), 5.82 (1H, d,  $J = 2.0$ , 6-H), 5.44 (1H, s, 3-H), 5.30 (1H, s, 2-H), 4.15 (2H, m, S-CH<sub>2</sub>), 4.13 (1H, s, 4-H); <sup>13</sup>C NMR (125 MHz, DMSO-*d*<sub>6</sub>)  $\delta$ : 165.2 (O-C-O), 158.1 (C-5), 157.2 (C-7), 155.5 (C-9), 145.5 (C-3'', 5''), 144.9 (C-3'), 138.9 (C-4'), 136.0 (C-4''), 133.2 (C-6''', 1'), 131.1 (C-2'''), 129.5 (C-1'''), 128.9 (C-5'''), 128.5 (C-3'''), 127.2 (C-4'''), 118.5 (C-1'), 117.5 (C-6'), 115.2 (C-5'), 114.2 (C-2'), 108.6 (C-2'', 6''), 96.8 (C-10), 95.9 (C-6), 94.0 (C-8), 72.8 (C-2), 71.2 (C-3), 33.7 (C-4), 30.7 (S-C).

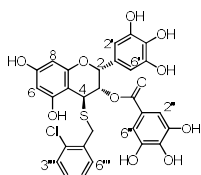

**JP-35:** UV  $\lambda_{\max}$  (MeOH) nm: 278, 216; mp. 149.1~151.3°C;  $[\alpha]_D^{25}$  -107.2° (c 0.1 MeOH); HR-ESI-MS ( $m/z$  615.0736 [M+H]<sup>+</sup>, calcd, 615.0722); <sup>1</sup>H NMR (500 MHz, DMSO-*d*<sub>6</sub>)  $\delta$ : 7.59 (1H, m, 3'''-H), 7.47 (1H, m, 5'''-H), 7.31 (2H, m, 4''', 6'''-H), 6.79 (2H, s, 2'', 6''-H), 6.39 (2H, s, 2', 6'-H), 5.90 (1H, d,  $J = 2.0$ , 8-H), 5.82 (1H, d,  $J = 2.0$ , 6-H), 5.36 (1H, s, 3-H), 5.33 (1H, s, 2-H), 4.14 (2H, m, S-CH<sub>2</sub>), 4.10 (1H, s, 4-H); <sup>13</sup>C NMR (125 MHz, DMSO-*d*<sub>6</sub>)  $\delta$ : 165.3 (O-C-O), 158.1 (C-5), 157.3 (C-7), 155.5 (C-9), 145.8 (C-3', 5'), 145.4 (C-3'', 5''), 138.9 (C-4''), 135.9 (C-4'), 133.2 (C-6'''), 132.6 (C-1'), 131.1 (C-2'''), 129.5 (C-1'''), 128.9 (C-5'''), 127.8 (C-3'''), 127.2 (C-4'''), 118.6 (C-1'), 108.6 (C-2'', 6''), 105.4 (C-2', 6'), 96.8 (C-10), 95.9 (C-6), 94.0

(C-8), 72.8 (C-2), 71.2 (C-3), 33.7 (C-4), 30.7 (S-C).

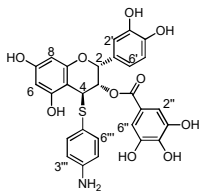

**JP-36:** UV  $\lambda_{\max}$  (MeOH) nm: 278, 216; mp. 143.7~146.4°C;  $[\alpha]_D^{25}$  -39.8° (*c* 0.1 MeOH); HR-ESI-MS ( $m/z$  566.1132 [M+H]<sup>+</sup>, calcd, 566.1115); <sup>1</sup>H NMR (500 MHz, DMSO-*d*<sub>6</sub>)  $\delta$ : 7.28 (2H, d, *J* = 8.0, 2''', 6'''-H), 6.82 (1H, s, 2'-H), 6.71 (1H, d, *J* = 8.5, 6'-H), 6.68 (2H, s, 2'', 6''-H), 6.65 (2H, d, *J* = 8.5, 5'-H), 6.60 (2H, d, *J* = 8.0, 3''', 5'''-H), 5.91 (1H, d, *J* = 2.0, 8-H), 5.83 (1H, d, *J* = 2.0, 6-H), 5.57 (1H, s, 3-H), 5.15 (1H, s, 2-H), 4.17 (1H, s, 4-H); <sup>13</sup>C NMR (125 MHz, DMSO-*d*<sub>6</sub>)  $\delta$ : 164.5 (O-C-O), 158.0 (C-5), 157.3 (C-7), 155.5 (C-9), 149.3 (C-4'''), 145.3 (C-3'', 5''), 144.9 (C-3'), 144.8 (C-4'), 138.7 (C-4''), 135.5 (C-2''', 6'''), 128.7 (C-1'), 118.6 (C-1'''), 117.4 (C-1''), 117.2 (C-6'), 115.2 (C-5'), 114.4 (C-3''', 5'''), 114.0 (C-2'), 108.5 (C-2'', 6''), 97.1 (C-10), 95.9 (C-6), 94.1 (C-8), 72.5 (C-2), 70.6 (C-3), 40.4 (C-4).

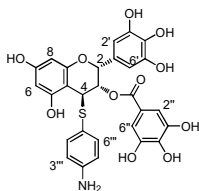

**JP-37:** UV  $\lambda_{\max}$  (MeOH) nm: 278, 216; mp. 146.8~148.5°C;  $[\alpha]_D^{25}$  -46.8° (*c* 0.1 MeOH); HR-ESI-MS ( $m/z$  582.1072[M+H]<sup>+</sup>, calcd, 582.1065); <sup>1</sup>H NMR (500 MHz, DMSO-*d*<sub>6</sub>)  $\delta$ : 7.25 (2H, d, *J* = 8.0, 2''', 6'''-H), 6.67 (2H, s, 2'', 6''-H), 6.58 (2H, d, *J* = 8.0, 3''', 5'''-H), 6.37 (2H, s, 2', 6'-H), 5.96 (1H, d, *J* = 2.0, 8-H), 5.83 (1H, d, *J* = 2.0, 6-H), 5.50 (1H, s, 3-H), 5.19 (1H, s, 2-H), 4.14 (1H, s, 4-H); <sup>13</sup>C NMR (125 MHz, DMSO-*d*<sub>6</sub>)  $\delta$ : 164.5 (O-C-O), 158.0 (C-5), 157.3 (C-7), 155.5 (C-9), 149.3 (C-4'''), 145.8 (C-3', 5'), 145.3 (C-3'', 5''), 138.7 (C-4''), 135.4 (C-2''', 6'''), 132.4 (C-4'), 128.0 (C-1'), 118.7 (C-1'''), 117.3 (C-1''), 114.4 (C-3''', 5'''), 108.6 (C-2'', 6''), 105.2 (C-2', 6'), 97.2 (C-10), 95.9 (C-6), 94.1 (C-8), 72.5 (C-2), 70.5 (C-3), 44.0 (C-4).



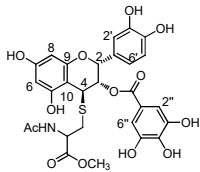

**JP-38:** UV  $\lambda_{\max}$  (MeOH) nm: 278, 216; mp. 158.9~161.3°C;  $[\alpha]_D^{25}$  -77.0° (*c* 0.1 MeOH); HR-ESI-MS (*m/z* 618.1277  $[M+H]^+$ , calcd, 618.1276);  $^1\text{H}$  NMR (500 MHz, DMSO-*d*<sub>6</sub>)  $\delta$ : 6.88 (1H, d, *J* = 2.0, 2'-H), 6.78 (3H, m, 2'', 6'', 6'-H), 6.69 (1H, d, *J* = 8.0, 5'-H), 5.97 (1H, d, *J* = 1.5, 8-H), 5.83 (1H, d, *J* = 1.5, 6-H), 5.37 (1H, s, 3-H), 5.17 (1H, s, 2-H), 4.68 (1H, m, -N-CH), 4.03 (1H, s, 4-H), 3.67 (3H, s, -OCH<sub>3</sub>), 3.15 (2H, m, -S-CH<sub>2</sub>), 1.88 (3H, s, -C-CH<sub>3</sub>);  $^{13}\text{C}$  NMR (125 MHz, DMSO-*d*<sub>6</sub>)  $\delta$ : 171.2 (N-C-O), 169.3 (-COO-CH<sub>3</sub>), 164.1 (O-C-O), 158.1 (C-5), 157.2 (C-7), 155.2 (C-9), 145.4 (C-3'', 5''), 144.9 (C-3', 4'), 138.9 (C-4''), 128.4 (C-1'), 118.4 (C-1''), 117.6 (C-6'), 115.2 (C-5'), 114.3 (C-2'), 108.6 (C-2'', 6''), 96.9 (C-10), 96.0 (C-6), 94.1 (C-8), 72.6 (C-2), 71.5 (C-3), 52.5 (N-CH), 52.1 (-OCH<sub>3</sub>), 40.4 (C-4), 33.1 (S-C), 22.3 (O=C-CH<sub>3</sub>).

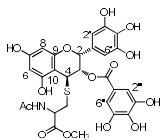

**JP-39:** UV  $\lambda_{\max}$  (MeOH) nm: 278, 216; mp. 166.0~167.3°C;  $[\alpha]_D^{25}$  -89° (*c* 0.1 MeOH); HR-ESI-MS (*m/z* 634.1253  $[M+H]^+$ , calcd, 634.1225);  $^1\text{H}$  NMR (500 MHz, DMSO-*d*<sub>6</sub>)  $\delta$ : 6.78 (2H, s, 2'', 6''-H), 6.43 (2H, s, 2', 6'-H), 5.94 (1H, d, *J* = 2.0, 8-H), 5.83 (1H, d, *J* = 2.0, 6-H), 5.28 (1H, s, 3-H), 5.19 (1H, s, 2-H), 4.69 (1H, m, -N-CH), 4.00 (1H, s, 4-H), 3.67 (3H, s, -OCH<sub>3</sub>), 3.15 (2H, m, -N-CH<sub>2</sub>), 1.88 (3H, s, -C-CH<sub>3</sub>);  $^{13}\text{C}$  NMR (125 MHz, DMSO-*d*<sub>6</sub>)  $\delta$ : 171.3 (N-C-O), 169.4 (-COO-CH<sub>3</sub>), 165.2 (O-C-O), 158.2 (C-5), 157.2 (C-7), 155.3 (C-9), 145.8 (C-3', 5'), 145.5 (C-3'', 5''), 138.9 (C-4''), 132.6 (C-4'), 127.7 (C-1'), 118.6 (C-1''), 108.7 (C-2'', 6''), 105.5 (C-2', 6'), 97.1 (C-10), 96.0 (C-6), 94.2 (C-8), 72.6 (C-2), 71.5 (C-3), 52.5 (N-CH), 52.2 (-OCH<sub>3</sub>), 40.4 (C-4), 33.2 (S-C), 22.4 (O=C-CH<sub>3</sub>).

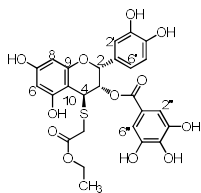

**JP-40:** UV  $\lambda_{\max}$  (MeOH) nm: 278, 216; mp. 142.2~143.4°C;  $[\alpha]_D^{25}$  -119.8° (*c* 0.1 MeOH); HR-ESI-MS ( $m/z$  561.1064  $[M+H]^+$ , calcd, 561.1061);  $^1\text{H}$  NMR (500 MHz, DMSO- $d_6$ )  $\delta$ : 6.87 (1H, s, 2'-H), 6.77 (2H, s, 2'', 6''-H), 6.76 (1H, dd,  $J = 8.0, 1.5$ , 6'-H), 6.69 (1H, d,  $J = 8.0$ , 5'-H), 5.95 (1H, d,  $J = 2.5$ , 8-H), 5.84 (1H, d,  $J = 2.5$ , 6-H), 5.44 (1H, s, 3-H), 5.27 (1H, s, 2-H), 4.14 (2H, m, S-C-H), 4.11 (1H, brs, 4-H), 3.64 (3H, m, -O-CH<sub>2</sub>), 1.20 (3H, t, H-CH<sub>3</sub>);  $^{13}\text{C}$  NMR (125 MHz, DMSO- $d_6$ )  $\delta$ : 170.2 (O-C-OCH<sub>2</sub>), 164.9 (O-C-O), 158.3 (C-5), 157.4 (C-7), 155.4 (C-9), 145.4 (C-3'', 5''), 144.9 (C-3', 4'), 138.8 (C-4''), 129.7 (C-1'), 118.5 (C-1''), 117.6 (C-6'), 115.2 (C-5'), 114.2 (C-2'), 109.1 (C-2'', 6''), 96.6 (C-10), 95.9 (C-6), 94.1 (C-8), 72.6 (C-2), 70.9 (C-3), 61.0 (C-OCH<sub>2</sub>), 33.9 (C-4), 33.5 (S-C), 14.0 (C-CH<sub>3</sub>).

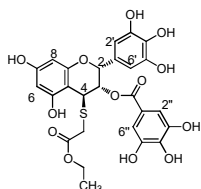

**JP-41:** UV  $\lambda_{\max}$  (MeOH) nm: 278, 216; mp. 147.8~149.2°C;  $[\alpha]_D^{25}$  -120.8° (*c* 0.1 MeOH); HR-ESI-MS ( $m/z$  577.1018  $[M+H]^+$ , calcd, 577.101);  $^1\text{H}$  NMR (500 MHz, DMSO- $d_6$ )  $\delta$ : 6.74 (1H, s, 2'', 6''-H), 6.39 (2H, s, 2', 6'-H), 5.92 (1H, d,  $J = 2.5$ , 8-H), 5.81 (1H, d,  $J = 2.5$ , 6-H), 5.32 (1H, s, 3-H), 5.25 (1H, s, 2-H), 4.11 (2H, m, S-C-H), 4.09 (1H, brs, 4-H), 3.60 (3H, m, -O-CH<sub>2</sub>), 1.17 (3H, t, H-CH<sub>3</sub>);  $^{13}\text{C}$  NMR (125 MHz, DMSO- $d_6$ )  $\delta$ : 170.1 (O-C-OCH<sub>2</sub>), 165.0 (O-C-O), 158.3 (C-5), 157.4 (C-7), 155.5 (C-9), 145.8 (C-3', 5'), 145.5 (C-3'', 5''), 138.9 (C-4''), 132.6 (C-4'), 127.8 (C-1'), 118.7 (C-1''), 108.7 (C-2'', 6''), 105.5 (C-2', 6'), 96.8 (C-10), 96.0 (C-6), 94.1 (C-8), 72.7 (C-2), 70.9 (C-3), 61.0 (C-OCH<sub>2</sub>), 40.3 (C-4), 33.9 (S-C), 14.0 (C-CH<sub>3</sub>).

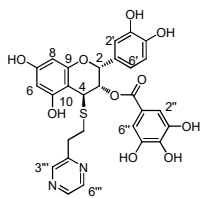

**JP-42:** UV  $\lambda_{\max}$  (MeOH) nm: 278, 216; mp. 158.9~161.3°C;  $[\alpha]_D^{25}$  -93.6° (*c* 0.1 MeOH); HR-ESI-MS (*m/z* 581.1232  $[M+H]^+$ , calcd, 581.1224);  $^1\text{H}$  NMR (500 MHz, DMSO-*d*<sub>6</sub>)  $\delta$ : 8.67 (1H, s, 6'''-H), 8.59 (1H, s, 3'''-H), 8.51 (1H, d, *J* = 2.0, 5'''-H), 6.85 (1H, d, *J* = 1.5, 2'-H), 6.80 (2H, s, 2'', 6''-H), 6.74 (1H, dd, *J* = 8.0, 1.5, 6'-H), 6.71 (1H, d, *J* = 8.0, 5'-H), 5.95 (1H, d, *J* = 2.0, 8-H), 5.83 (1H, d, *J* = 2.0, 6-H), 5.36 (1H, s, 3-H), 5.21 (1H, s, 2-H), 4.10 (1H, d, *J* = 1.5, 4-H), 3.25 (2H, m, 2'''-CH<sub>2</sub>), 3.18 (2H, m, S-CH<sub>2</sub>);  $^{13}\text{C}$  NMR (125 MHz, DMSO-*d*<sub>6</sub>)  $\delta$ : 165.3 (O-C-O), 158.0 (C-5), 157.2 (C-7), 155.5 (C-9), 155.2 (C-2'''), 145.4 (C-3'', 5''), 144.9 (C-3', 4', 3''', 6'''), 144.1 (C-5'''), 142.6 (C-4''), 128.3 (C-1'), 118.4 (C-1''), 117.5 (C-6'), 115.2 (C-5'), 114.1 (C-2'), 108.6 (C-2'', 6''), 97.3 (C-10), 95.9 (C-6), 94.0 (C-8), 72.7 (C-2), 71.8 (C-3), 40.0 (C-4), 34.7 (2'''-CH<sub>2</sub>), 30.1 (S-C).

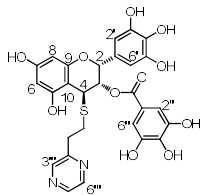

**JP-43:** UV  $\lambda_{\max}$  (MeOH) nm: 278, 216; mp. 166.0~167.3°C;  $[\alpha]_D^{25}$  -91.4° (*c* 0.1 MeOH); HR-ESI-MS (*m/z* 597.1171  $[M+H]^+$ , calcd, 597.1174);  $^1\text{H}$  NMR (500 MHz, DMSO-*d*<sub>6</sub>)  $\delta$ : 8.67 (1H, s, 6'''-H), 8.59 (1H, s, 3'''-H), 8.51 (1H, d, *J* = 2.0, 5'''-H), 6.79 (2H, s, 2'', 6''-H), 6.40 (2H, s, 2', 6'-H), 5.94 (1H, d, *J* = 2.0, 8-H), 5.83 (1H, d, *J* = 2.0, 6-H), 5.29 (1H, s, 3-H), 5.24 (1H, s, 2-H), 4.07 (1H, d, *J* = 1.5, 4-H), 3.25 (2H, m, 2'''-CH<sub>2</sub>), 3.18 (2H, m, S-C-H);  $^{13}\text{C}$  NMR (125 MHz, DMSO-*d*<sub>6</sub>)  $\delta$ : 165.3 (O-C-O), 158.0 (C-5), 157.2 (C-7), 155.4 (C-9), 155.2 (C-2'''), 145.8 (C-3', 5'), 145.4 (C-3'', 5''), 144.9 (C-3'''), 144.1 (C-6'''), 142.6 (C-5'''), 138.9 (C-4''), 132.3 (C-4'), 127.8 (C-1'), 118.6 (C-1''), 108.7 (C-2'', 6''), 105.3 (C-2', 6'), 97.4 (C-10), 95.9 (C-6), 94.0 (C-8), 72.7 (C-2), 71.7 (C-3), 40.0 (C-4), 34.7 (2'''-CH<sub>2</sub>), 30.1 (S-C).

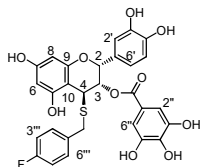

**JP-44:** UV  $\lambda_{\max}$  (MeOH) nm: 278, 216; mp. 143.2~145.3°C;  $[\alpha]_D^{25}$  -101.1° (*c* 0.1 MeOH); HR-ESI-MS (*m/z* 583.1065  $[M+H]^+$ , calcd, 583.1069);  $^1\text{H}$  NMR (500 MHz, DMSO-*d*<sub>6</sub>)  $\delta$ : 7.49 (2H, m, 2''', 6'''H), 7.48 (2H, m, 3''', 5'''H), 7.14 (1H, s, 2'-H), 6.83 (2H, s, 2'', 6''-H), 6.67 (2H, brs, 5', 6'-H), 5.90 (1H, d, *J* = 2.0, 8-H), 5.81 (1H, d, *J* = 2.0, 6-H), 5.42 (1H, s, 3-H), 5.21 (1H, s, 2-H), 4.05 (2H, m, S-C-H), 4.01 (1H, d, *J* = 2.0, 4-H);  $^{13}\text{C}$  NMR (125 MHz, DMSO-*d*<sub>6</sub>)  $\delta$ : 165.1 (O-C-O), 160.2 (C-4'''), 158.0 (C-5), 157.2 (C-7), 155.4 (C-9), 145.4 (C-3'', 5''), 144.9 (C-3', 4'), 138.9 (C-4''), 135.0 (C-1'''), 130.8 (C-2''', 6'''), 128.5 (C-1'), 118.4 (C-1''), 117.5 (C-6'), 115.2 (C-3''', 5'''), 115.1 (C-5'), 114.0 (C-2'), 108.6 (C-2'', 6''), 97.0 (C-10), 95.9 (C-6), 94.0 (C-8), 72.7 (C-2), 71.2 (C-3), 40.0 (C-4), 34.9 (S-C).

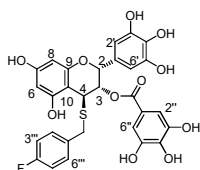

**JP-45:** UV  $\lambda_{\max}$  (MeOH) nm: 278, 216; mp. 144.6~147.1°C;  $[\alpha]_D^{25}$  -95.2° (*c* 0.1 MeOH); HR-ESI-MS (*m/z* 599.1012  $[M+H]^+$ , calcd, 599.1018);  $^1\text{H}$  NMR (500 MHz, DMSO-*d*<sub>6</sub>)  $\delta$ : 7.48 (2H, t, 2''', 6'''-H), 7.14 (2H, t, *J* = 8.5, 3''', 5'''-H), 6.78 (2H, s, 2'', 6''-H), 6.39 (1H, s, 2', 6'-H), 5.90 (1H, d, *J* = 2.0, 8-H), 5.82 (1H, d, *J* = 2.0, 6-H), 5.35 (1H, s, 3-H), 5.25 (1H, brs, 2-H), 4.06 (2H, m, S-CH<sub>2</sub>), 4.02 (1H, m, 4-H);  $^{13}\text{C}$  NMR (125 MHz, DMSO-*d*<sub>6</sub>)  $\delta$ : 165.2 (O-C-O), 162.1 (C-4'''), 160.2 (C-5), 158.0 (C-7), 157.2 (C-9), 145.8 (C-3', 5'), 145.4 (C-3'', 5''), 138.9 (C-4''), 134.8 (C-1'''), 132.5 (C-4'), 130.8 (C-2''', 6'''), 127.8 (C-1'), 118.6 (C-1''), 115.1 (C-3''', 5'''), 108.7 (C-2'', 6''), 105.4 (C-2', 6'), 97.1 (C-10), 95.9 (C-6), 94.0 (C-8), 72.8 (C-2), 71.2 (C-3), 40.0 (C-4), 34.9 (C-CH<sub>2</sub>).

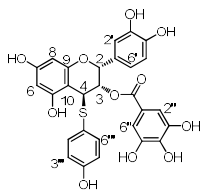

**JP-46:** UV  $\lambda_{\max}$  (MeOH) nm: 278, 216; mp. 153.1~155.6°C;  $[\alpha]_D^{25}$  -29.1° (*c* 0.1 MeOH); HR-ESI-MS (*m/z* 567.0949 [M+H]<sup>+</sup>, calcd, 567.0956); <sup>1</sup>H NMR (500 MHz, DMSO-*d*<sub>6</sub>)  $\delta$ : 7.45 (2H, d, *J* = 8.5, 2''', 6'''-H), 6.82 (1H, d, *J* = 1.5, 2'-H), 6.80 (2H, d, *J* = 8.5, 3''', 5'''-H), 6.73 (1H, dd, *J* = 8.0, 1.5, 6'-H), 6.70 (2H, s, 2'', 6''-H), 6.67 (1H, d, *J* = 8.0, 5'-H), 5.98 (1H, d, *J* = 2.0, 8-H), 5.85 (1H, d, *J* = 2.0, 6-H), 5.49 (1H, s, 3-H), 5.12 (1H, brs, 2-H), 4.27 (1H, d, *J* = 2.0, 4-H); <sup>13</sup>C NMR (125 MHz, DMSO-*d*<sub>6</sub>)  $\delta$ : 164.6 (O-C-O), 158.2 (C-5), 157.7 (C-7), 157.3 (C-9), 155.5 (C-4'''), 145.4 (C-3'', 5''), 144.9 (C-3', 4'), 138.7 (C-4''), 135.2 (C-2''', 6'''), 128.6 (C-1'), 122.1 (C-1'''), 118.5 (C-1''), 117.4 (C-6'), 116.2 (C-3''', 5'''), 115.2 (C-5'), 114.0 (C-2'), 108.6 (C-2'', 6''), 96.8 (C-10), 96.0 (C-6), 94.1 (C-8), 72.6 (C-2), 70.5 (C-3), 43.5 (C-4).

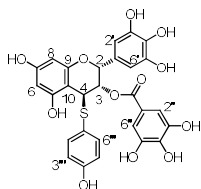

**JP-47:** UV  $\lambda_{\max}$  (MeOH) nm: 278, 216; mp. 151.3~153.5°C;  $[\alpha]_D^{25}$  -49.3° (*c* 0.1 MeOH); HR-ESI-MS (*m/z* 583.0884 [M+H]<sup>+</sup>, calcd, 583.0905); <sup>1</sup>H NMR (500 MHz, DMSO-*d*<sub>6</sub>)  $\delta$ : 7.44 (2H, d, *J* = 8.5, 2''', 6'''-H), 6.82 (2H, d, *J* = 8.5, 3''', 5'''-H), 6.67 (2H, s, 2'', 6''-H), 6.37 (1H, s, 2', 6'-H), 5.97 (1H, d, *J* = 2.0, 8-H), 5.85 (1H, d, *J* = 2.0, 6-H), 5.49 (1H, s, 3-H), 5.16 (1H, brs, 2-H), 4.24 (1H, d, *J* = 2.0, 4-H); <sup>13</sup>C NMR (125 MHz, DMSO-*d*<sub>6</sub>)  $\delta$ : 164.6 (O-C-O), 158.2 (C-5), 157.7 (C-7), 157.3 (C-9), 155.5 (C-4'''), 145.8 (C-3', 5'), 145.3 (C-3'', 5''), 138.7 (C-4''), 135.0 (C-2''', 6'''), 132.5 (C-4'), 127.9 (C-1'), 122.1 (C-1'''), 118.6 (C-1''), 116.3 (C-3''', 5'''), 108.6 (C-2'', 6''), 105.2 (C-2', 6'), 96.8 (C-10), 95.9 (C-6), 94.1 (C-8), 72.5 (C-2), 70.5 (C-3), 43.7 (C-4).

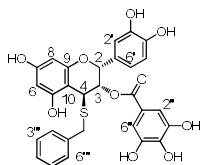

**JP-48:** UV  $\lambda_{\max}$  (MeOH) nm: 278, 216; mp. 135.6~138.1°C; ESI-MS: ( $m/z$  563.1 [M-H]<sup>-</sup>, 599.0 [M+Cl]<sup>-</sup>); <sup>1</sup>H NMR (400 MHz, DMSO-*d*<sub>6</sub>)  $\delta$ : 7.45 (2H, m, 2''', 6'''-H), 7.33 (2H, t, 3''', 5'''-H), 7.23 (1H, t, 4'''-H), 6.83 (1H, brs, 2'-H), 6.78 (2H, s, 2'', 6''-H), 6.67 (2H, s, 5', 6'-H), 5.92 (1H, d,  $J = 2.0$ , 8-H), 5.82 (1H, d,  $J = 2.0$ , 6-H), 5.43 (1H, brs, 3-H), 5.25 (1H, brs, 2-H), 4.07(1H, d,  $J = 2.0$ , 4-H), 4.05 (1H, dd,  $J = 27.0, 13.0$ , S-C-H).

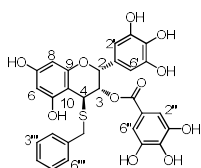

**JP-49:** UV  $\lambda_{\max}$  (MeOH) nm: 278, 216; mp. 146.3~147.4°C; ESI-MS: ( $m/z$  579.2 [M-H]<sup>-</sup>, 615.0 [M+Cl]<sup>-</sup>); <sup>1</sup>H NMR (400 MHz, DMSO-*d*<sub>6</sub>)  $\delta$ : 7.44 (2H, m, 2''', 6'''-H), 7.33 (2H, t, 3''', 5'''-H), 7.24 (1H, t, 4'''-H), 6.78 (2H, s, 2'', 6''-H), 6.38 (2H, s, 2', 6'-H), 5.92 (1H, d,  $J = 2.0$ , 8-H), 5.82 (1H, d,  $J = 2.0$ , 6-H), 5.36(1H, brs, 3-H), 5.29 (1H, brs, 2-H), 4.05 (1H, dd,  $J = 27.0, 13.0$ , S-C-H), 4.04(1H, d,  $J = 2.0$ , 4-H).

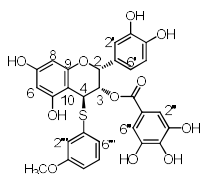

**JP-50:** UV  $\lambda_{\max}$  (MeOH) nm: 278, 216; mp. 140.5~142.6°C;  $[\alpha]_D^{25} -27.6^\circ$  (*c* 0.1 MeOH); HR-ESI-MS ( $m/z$  581.1123 [M+H]<sup>+</sup>, calcd, 581.1112); <sup>1</sup>H NMR (500 MHz, DMSO-*d*<sub>6</sub>)  $\delta$ : 7.31(1H, m, 5'''-H), 7.19 (1H, d,  $J = 2.5$ , 2'''-H), 7.14 (1H, dd,  $J = 9.0, 2.5$ , 6'''-H), 6.86 (1H, dd,  $J = 9.0, 2.5$ , 4'''-H), 6.79 (1H, d,  $J = 2.5$ , 2'-H), 6.76 (2H, s, 2'', 6''-H), 6.71 (1H, dd,  $J = 9.0, 2.5$ , 6'-H), 6.65 (1H, d,  $J = 9.0$ , 5'-H), 5.99 (1H, d,  $J = 2.5$ , 8-H), 5.88 (1H, d,  $J = 2.5$ , 6-H), 5.54 (1H, d,  $J = 2.5$ , 3-H), 5.18 (1H, d,  $J = 2.5$ , 2-H), 4.59 (1H, d,  $J = 2.5$ , 4-H), 3.81 (3H, s, -OCH<sub>3</sub>); <sup>13</sup>C NMR (125 MHz, DMSO-*d*<sub>6</sub>)  $\delta$ : 164.9 (O-C-O), 159.7 (C-3'''), 158.4 (C-5), 157.3 (C-7), 155.6 (C-9), 145.4 (C-3'',

5''), 145.0 (C-3'), 144.9 (C-4'), 138.9 (C-4''), 136.2 (C-1'''), 130.0 (C-1'), 128.4 (C-5'''), 121.7 (C-6'''), 118.4 (C-1''), 117.5 (C-6'), 115.3 (C-5'), 114.4 (C-2'), 114.0 (C-2'''), 112.9 (C-4'''), 108.7 (C-2'', 6''), 96.0 (C-10), 95.9 (C-6), 94.2 (C-8), 72.8 (C-2), 70.9 (C-3), 55.2 (C-OCH<sub>3</sub>), 41.2 (C-4).

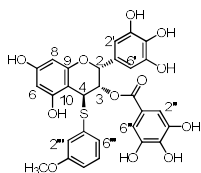

**JP-51:** UV  $\lambda_{\max}$  (MeOH) nm: 278, 216; mp. 149.6~152.3°C;  $[\alpha]_D^{25}$  -32.3° (c 0.1 MeOH); HR-ESI-MS ( $m/z$  597.1059 [M+H]<sup>+</sup>, calcd, 597.1061); <sup>1</sup>H NMR (500 MHz, DMSO-*d*<sub>6</sub>)  $\delta$ : 7.31 (1H, m, 5'''-H), 7.18 (1H, d,  $J = 2.5$ , 2'''-H), 7.13 (1H, dd,  $J = 9.0, 2.5$ , 6'''-H), 6.86 (1H, dd,  $J = 9.0, 2.5$ , 4'''-H), 6.75 (2H, s, 2'', 6''-H), 6.35 (2H, s, 2', 6'-H), 5.99 (1H, d,  $J = 2.5$ , 8-H), 5.88 (1H, d,  $J = 2.5$ , 6-H), 5.46 (1H, s, 3-H), 5.22 (1H, d,  $J = 2.5$ , 2-H), 4.58 (1H, d,  $J = 2.5$ , 4-H), 3.81 (3H, s, -OCH<sub>3</sub>); <sup>13</sup>C NMR (125 MHz, DMSO-*d*<sub>6</sub>)  $\delta$ : 164.9 (O-C-O), 159.7 (C-3'''), 158.4 (C-5), 157.3 (C-7), 155.6 (C-9), 145.8 (C-3', 5'), 145.4 (C-3'', 5''), 138.9 (C-4''), 136.2 (C-1'''), 132.5 (C-4'), 130.0 (C-1'), 127.6 (C-5'''), 121.4 (C-6'''), 118.4 (C-1''), 114.2 (C-2'''), 112.8 (C-4'''), 108.7 (C-2'', 6''), 105.2 (C-2', 6'), 96.0 (C-10), 95.9 (C-6), 94.2 (C-8), 72.8 (C-2), 70.8 (C-3), 55.1 (C-OCH<sub>3</sub>), 41.2 (C-4).

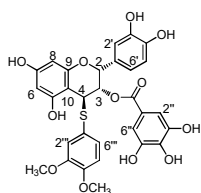

**JP-52:** UV  $\lambda_{\max}$  (MeOH) nm: 278, 216; mp. 149.6~151.5°C;  $[\alpha]_D^{25}$  -42.8° (c 0.1 MeOH); HR-ESI-MS ( $m/z$  611.1208 [M+H]<sup>+</sup>, calcd, 611.1218); <sup>1</sup>H NMR (500 MHz, DMSO-*d*<sub>6</sub>)  $\delta$ : 7.17 (1H, dd,  $J = 9.0, 2.5$ , 6'''-H), 7.16 (1H, d,  $J = 2.5$ , 2'''-H), 7.15 (1H, d,  $J = 9.0, 5'''$ -H), 6.80 (1H, d,  $J = 2.5$ , 2'-H), 6.72 (2H, s, 2'', 6''-H), 6.71 (1H, dd,  $J = 9.0, 2.5$ , 6'-H), 6.65 (1H, d,  $J = 9.0, 5'$ -H), 5.99 (1H, d,  $J = 2.5$ , 8-H), 5.85 (1H, d,  $J = 2.5, 6$ -H), 5.52 (1H, brs, 3-H), 5.16 (1H, brs, 2-H), 4.43 (1H, d,  $J = 2.5, 4$ -H), 3.80 (3H, s, 4'''-OCH<sub>3</sub>), 3.78 (3H, s, 3'''-OCH<sub>3</sub>); <sup>13</sup>C NMR (125 MHz, DMSO-*d*<sub>6</sub>)  $\delta$ : 164.7

(O-C-O), 158.3 (C-5), 157.3 (C-7), 155.6 (C-9), 148.9 (C-4'''), 148.7 (C-3'''), 145.4 (C-3'', 5''), 144.9 (C-3'), 144.8 (C-4'), 138.8 (C-4''), 128.5 (C-1'), 124.9 (C-1'''), 124.7 (C-6'''), 118.4 (C-1''), 117.4 (C-6'), 115.6 (C-5'), 115.2 (C-2'), 114.0 (C-5'''), 112.1 (C-2'''), 108.6 (C-2'', 6''), 96.5 (C-10), 95.9 (C-6), 94.2 (C-8), 72.6 (C-2), 70.8 (C-3), 55.5 (C-4'''-OCH<sub>3</sub>), 55.4 (C-3'''-OCH<sub>3</sub>), 42.6 (C-4).

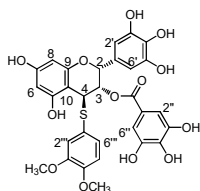

**JP-53:** UV  $\lambda_{\max}$  (MeOH) nm: 278, 216; mp. 150.1~152.3°C;  $[\alpha]_D^{25}$  -31.8° (*c* 0.1 MeOH); HR-ESI-MS (*m/z* 627.1172 [M+H]<sup>+</sup>, calcd, 627.1167); <sup>1</sup>H NMR (500 MHz, DMSO-*d*<sub>6</sub>)  $\delta$ : 7.16 (1H, dd, *J* = 9.0, 2.5, 6'''-H), 7.14 (1H, d, *J* = 2.5, 2'''-H), 7.00 (1H, d, *J* = 9.0, 2.5, 5'''-H), 6.71 (1H, s, 2'', 6''-H), 6.36 (2H, s, 2', 6'-H), 5.99 (1H, d, *J* = 2.5, 8-H), 5.86 (1H, d, *J* = 2.5, 6-H), 5.45 (1H, brs, 3-H), 5.20 (1H, brs, 2-H), 4.41 (2H, d, *J* = 2.5, 4-H), 3.81 (3H, s, 4'''-OCH<sub>3</sub>), 3.78 (3H, s, 3'''-OCH<sub>3</sub>); <sup>13</sup>C NMR (125 MHz, DMSO-*d*<sub>6</sub>)  $\delta$ : 164.8 (O-C-O), 158.3 (C-5), 157.3 (C-7), 155.6 (C-9), 148.9 (C-4'''), 148.7 (C-3'''), 145.8 (C-3', 5'), 145.4 (C-3'', 5''), 138.8 (C-4''), 132.5 (C-4'), 127.8 (C-1'), 124.8 (C-1'''), 124.7 (C-6'''), 118.5 (C-1''), 115.4 (C-5'''), 112.2 (C-2'''), 108.7 (C-2'', 6''), 105.2 (C-2', 6'), 96.6 (C-10), 96.0 (C-6), 94.2 (C-8), 72.6 (C-2), 70.8 (C-3), 55.5 (C-4'''-OCH<sub>3</sub>), 55.4 (C-3'''-OCH<sub>3</sub>), 42.7 (C-4).

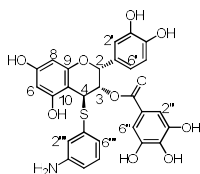

**JP-54:** UV  $\lambda_{\max}$  (MeOH) nm: 278, 216; mp. 144.3~145.6°C;  $[\alpha]_D^{25}$  -20.2° (*c* 0.1 MeOH); HR-ESI-MS (*m/z* 588.0941 [M+H]<sup>+</sup>, calcd, 588.0935); <sup>1</sup>H NMR (500 MHz, DMSO-*d*<sub>6</sub>)  $\delta$ : 7.04 (1H, m, 2'''-H), 6.79 (2H, m, 5''', 6'''-H), 6.77 (1H, d, *J* = 2.5, 2'-H), 6.71 (2H, s, 2'', 6''-H), 6.68 (1H, dd, *J* = 9.0, 2.5, 6'-H), 6.65 (1H, d, *J* = 9.0, 5'-H), 6.50 (1H, dd, *J* = 9.0, 2.5, 4'''-H), 5.98 (1H, brs, 8-H), 5.86 (1H, brs, 6-H), 5.58 (1H, brs, 3-H), 5.18 (1H, brs, 2-H), 4.48 (1H, brs, 4-H); <sup>13</sup>C NMR (125 MHz, DMSO-*d*<sub>6</sub>)  $\delta$ :



164.6 (O-C-O), 158.3 (C-5), 157.3 (C-7), 155.6 (C-9), 149.3 (C-3'''), 145.4 (C-3'', 5''), 144.9 (C-3', 4'), 134.4 (C-4''), 129.6 (C-1'''), 129.5 (C-1'), 128.5 (C-5'''), 117.7 (C-1''), 117.4 (C-6'), 115.6 (C-6'''), 115.2 (C-5'), 114.0 (C-2'), 113.0 (C-2'''), 111.3 (C-4'''), 108.6 (C-2'', 6''), 96.4 (C-10), 95.9 (C-6), 94.1 (C-8), 72.8 (C-2), 70.6 (C-3), 41.4 (C-4).

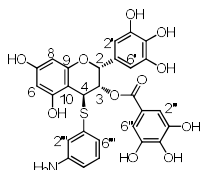

**JP-55:** UV  $\lambda_{\max}$  (MeOH) nm: 278, 216; mp. 149.2~151.5°C;  $[\alpha]_D^{25}$  -16.6° (c 0.1 MeOH); HR-ESI-MS ( $m/z$  604.0874  $[M+H]^+$ , calcd, 604.0884);  $^1\text{H}$  NMR (500 MHz, DMSO- $d_6$ )  $\delta$ : 7.05 (1H, m, 2''-H), 6.78 (2H, m, 5''', 6'''-H), 6.73 (2H, s, 2'', 6''-H), 6.51 (1H, dd,  $J = 8.0, 2.0$ , 4'''-H), 6.35 (1H, s, 2', 6'-H), 5.98 (1H, d,  $J = 2.0$ , 8-H), 5.87 (1H, d,  $J = 2.0$ , 6-H), 5.51 (1H, brs, 3-H), 5.23 (1H, brs, 2-H), 5.18 (2H, brs, -NH<sub>2</sub>), 4.47 (1H, d,  $J = 2.0$ , 4-H);  $^{13}\text{C}$  NMR (125 MHz, DMSO- $d_6$ )  $\delta$ : 164.6 (O-C-O), 158.3 (C-5), 157.3 (C-7), 155.6 (C-9), 149.3 (C-3'''), 145.8 (C-3', 5'), 145.4 (C-3'', 5''), 138.9 (C-4''), 134.9 (C-1'''), 132.5 (C-4'), 129.6 (C-1'), 127.8 (C-5'''), 118.5 (C-1''), 117.5 (C-6'''), 115.3 (C-2'''), 112.9 (C-4'''), 108.7 (C-2'', 6''), 105.2 (C-2', 6'), 96.5 (C-10), 95.9 (C-6), 94.1 (C-8), 72.7 (C-2), 70.6 (C-3), 41.5 (C-4).

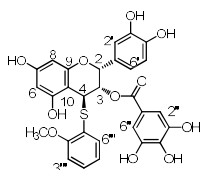

**JP-56:** UV  $\lambda_{\max}$  (MeOH) nm: 278, 216; mp. 139.5~142.7°C;  $[\alpha]_D^{25}$  -66.3° (c 0.1 MeOH); HR-ESI-MS ( $m/z$  581.1118  $[M+H]^+$ , calcd, 581.1112);  $^1\text{H}$  NMR (500 MHz, DMSO- $d_6$ )  $\delta$ : 7.70 (1H, dd,  $J = 8.0, 1.5$ , 6'''-H), 7.30 (1H, m, 4'''-H), 7.06 (1H, dd,  $J = 8.0, 1.5$ , 3'''-H), 7.01 (1H, m, 5'''-H), 6.76 (1H, d,  $J = 2.0$ , 2'-H), 6.74 (2H, s, 2'', 6''-H), 6.68 (1H, dd,  $J = 8.0, 2.0$ , 6'-H), 6.50 (1H, d,  $J = 8.0$ , 5'-H), 5.98 (1H, d,  $J = 2.0$ , 8-H), 5.88 (1H, d,  $J = 2.0$ , 6-H), 5.62 (1H, brs, 3-H), 5.14 (1H, brs, 2-H), 4.56 (1H, d,  $J = 2.0$ , 4-H), 3.84 (3H, s, -OCH<sub>3</sub>);  $^{13}\text{C}$  NMR (125 MHz, DMSO- $d_6$ )  $\delta$ : 164.8 (O-C-O),

158.3 (C-5), 157.4 (C-7), 155.7 (C-9), 145.4 (C-3'', 5''), 144.9 (C-3', 4'), 138.8 (C-4''), 131.1 (C-1'), 128.5 (C-6'''), 128.4 (C-4'''), 122.5 (C-1''), 121.1 (C-5'''), 118.5 (C-1'''), 117.4 (C-6'), 115.2 (C-5'), 114.0 (C-2'), 111.4 (C-3'''), 108.7 (C-2'', 6''), 96.3 (C-10), 96.0 (C-6), 94.2 (C-8), 72.9 (C-2), 70.4 (C-3), 55.8 (C-OCH<sub>3</sub>), 40.4 (C-4).

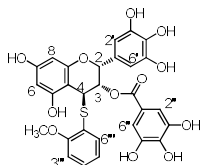

**JP-57:** UV  $\lambda_{\max}$  (MeOH) nm: 278, 216; mp. 157.3~159.5°C;  $[\alpha]_D^{25}$  -87.5° (*c* 0.1 MeOH); HR-ESI-MS ( $m/z$  597.1068 [M+H]<sup>+</sup>, calcd, 597.1061); <sup>1</sup>H NMR (500 MHz, DMSO-*d*<sub>6</sub>)  $\delta$ : 7.70 (1H, dd, *J* = 8.0, 1.5, 6'''-H), 7.30 (1H, m, 4'''-H), 7.08 (1H, dd, *J* = 8.0, 1.5, 3'''-H), 7.02 (1H, m, 5'''-H), 6.74 (2H, s, 2'', 6''-H), 6.33 (1H, s, 2', 6'-H), 5.98 (1H, d, *J* = 2.5, 8-H), 5.88 (1H, d, *J* = 2.5, 6-H), 5.54 (1H, brs, 2-H), 5.18 (1H, d, *J* = 2.0, 3-H), 4.54 (1H, d, *J* = 2.5, 4-H), 3.85 (3H, s, -OCH<sub>3</sub>); <sup>13</sup>C NMR (125 MHz, DMSO-*d*<sub>6</sub>)  $\delta$ : 164.8 (O-C-O), 158.3 (C-5), 157.4 (C-7), 155.7 (C-9), 145.8 (C-3', 5'), 145.4 (C-3'', 5''), 138.8 (C-4''), 132.5 (C-4'), 130.8 (C-1'), 128.2 (C-6'''), 127.8 (C-4'''), 122.6 (C-1''), 121.1 (C-5'''), 118.6 (C-1'''), 111.4 (C-3'''), 108.7 (C-2'', 6''), 105.2 (C-2', 6'), 96.3 (C-10), 96.0 (C-6), 94.2 (C-8), 72.9 (C-2), 70.3 (C-3), 55.8 (C-OCH<sub>3</sub>), 40.4 (C-4).

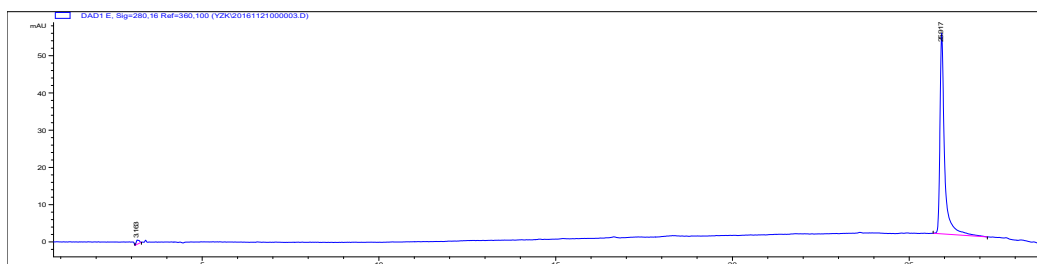

| # | Time   | Peak area | Peak height | Peak width | Symmetry factor | Peak area % |
|---|--------|-----------|-------------|------------|-----------------|-------------|
| 1 | 3.163  | 6.4       | 1.1         | 0.0823     | 0.544           | 1.282       |
| 2 | 25.917 | 491.5     | 53.9        | 0.1324     | 0.528           | 98.718      |

Figure S170. HPLC analysis of the purity of JP-8 (98.7%). Chromatographic column: Apollo C<sub>18</sub> 5 $\mu$ m, 250  $\times$  4.6 mm; mobile phase: methanol-water (0.2% acetic acid) (5:95-100:0, 30min); flow rate: 1mL/min; column temperature: 40°C; detection wavelength: 280nm.

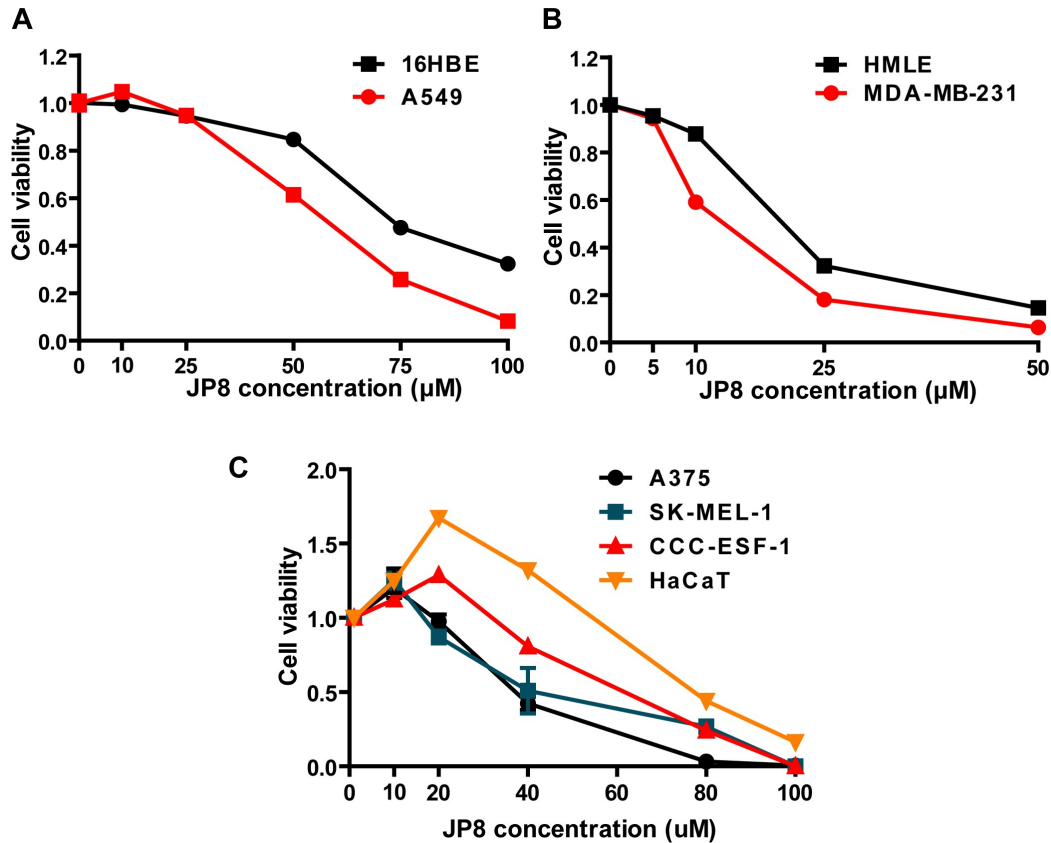

**Figure S171. Effects of JP8 on the growth inhibition of human lung cancer cell A549, human breast cancer cell MDA-MB-231, human malignant melanoma cell A375 and human malignant melanoma cell SK-MEL-1. The cytotoxicity of JP8 on human bronchial epithelial cell 16HBE, human mammary epithelial cell HMLE, immortalized human keratinocyte cell HaCat and human embryonic skin fibroblast cell CCC-ESF-1 was also determined. Cells were grown in 96 well plates and treated with JP8 at 5-100  $\mu$ M or DMSO (control) for 48 h. Cytotoxicity was measured using cell counting kit-8 (CCK-8).**

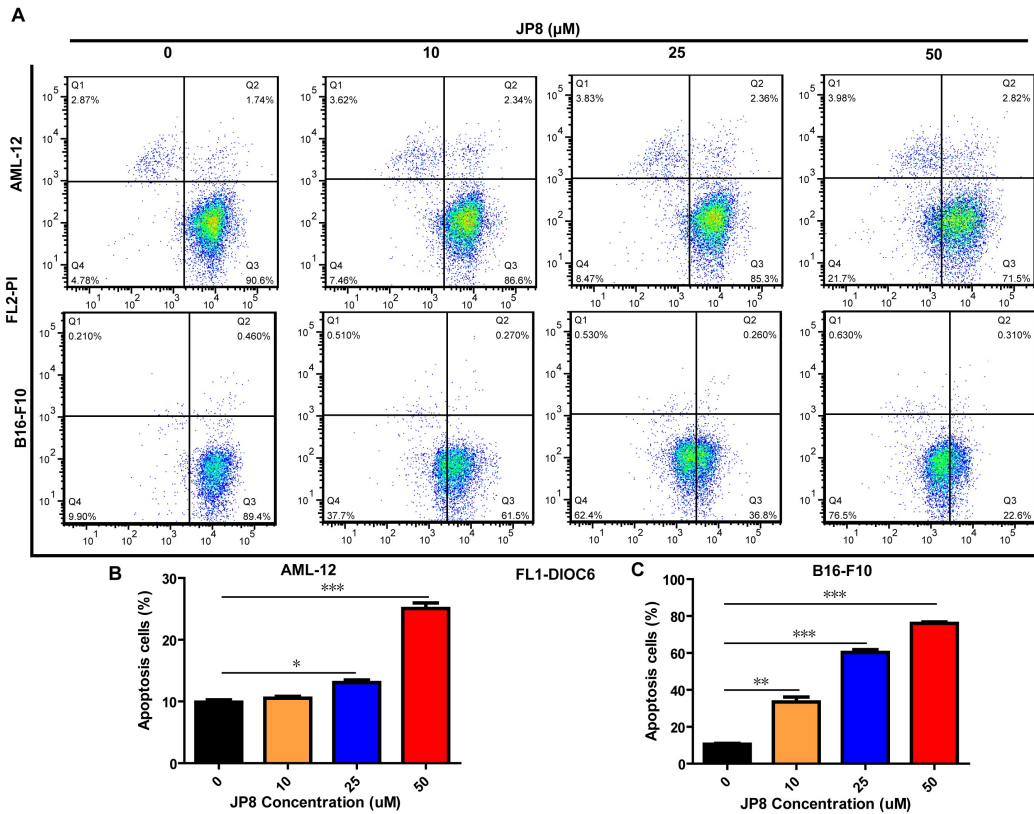

**Figure S172. Apoptotic effects of JP8 on B16-F10 and AML-12 cells.** Cells were double stained by DIOC6/PI after JP8 treatment at indicated concentration for 48h (A). The drop in mitochondria transmembrane potential can be detected with the dye DIOC6. Live cells are featured with DIOC<sup>high</sup> and PI<sup>low</sup> (the Q3 quadrant), early apoptotic cells are featured with DIOC<sup>low</sup> and PI<sup>low</sup> (the Q4 quadrant) and late apoptotic cells are featured with DIOC<sup>low</sup> and PI<sup>high</sup> (the Q1 quadrant). Q1 and Q4 quadrant cells were quantified as apoptosis cells (B and C).

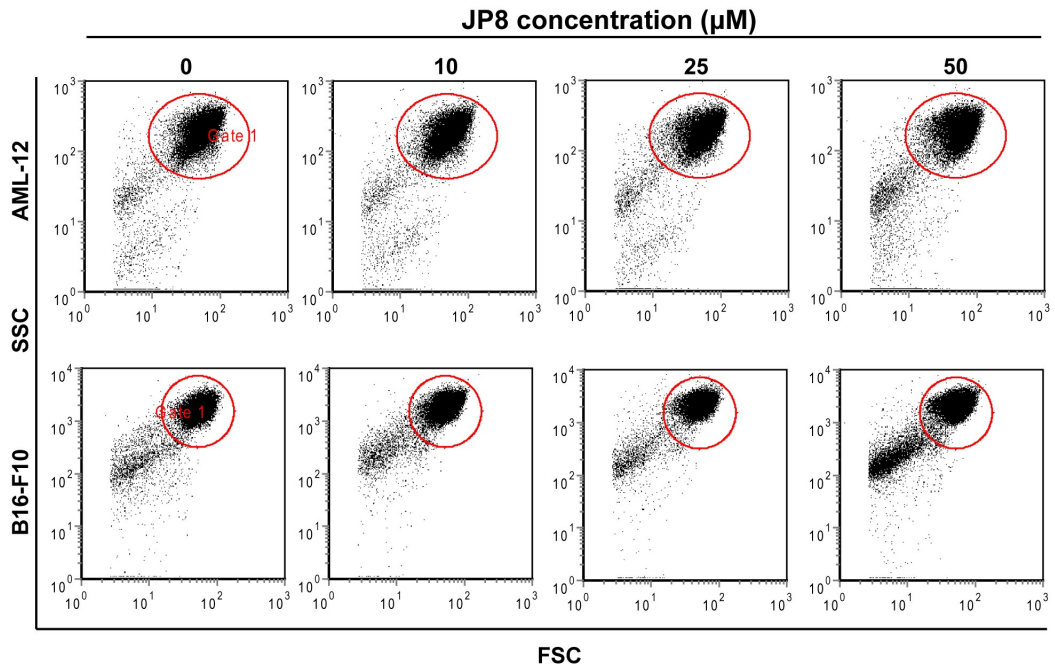

**Figure S173. Morphological displays of JP8 treated AML-12 and B16 cells evidenced with FSC/SSC criteria.**

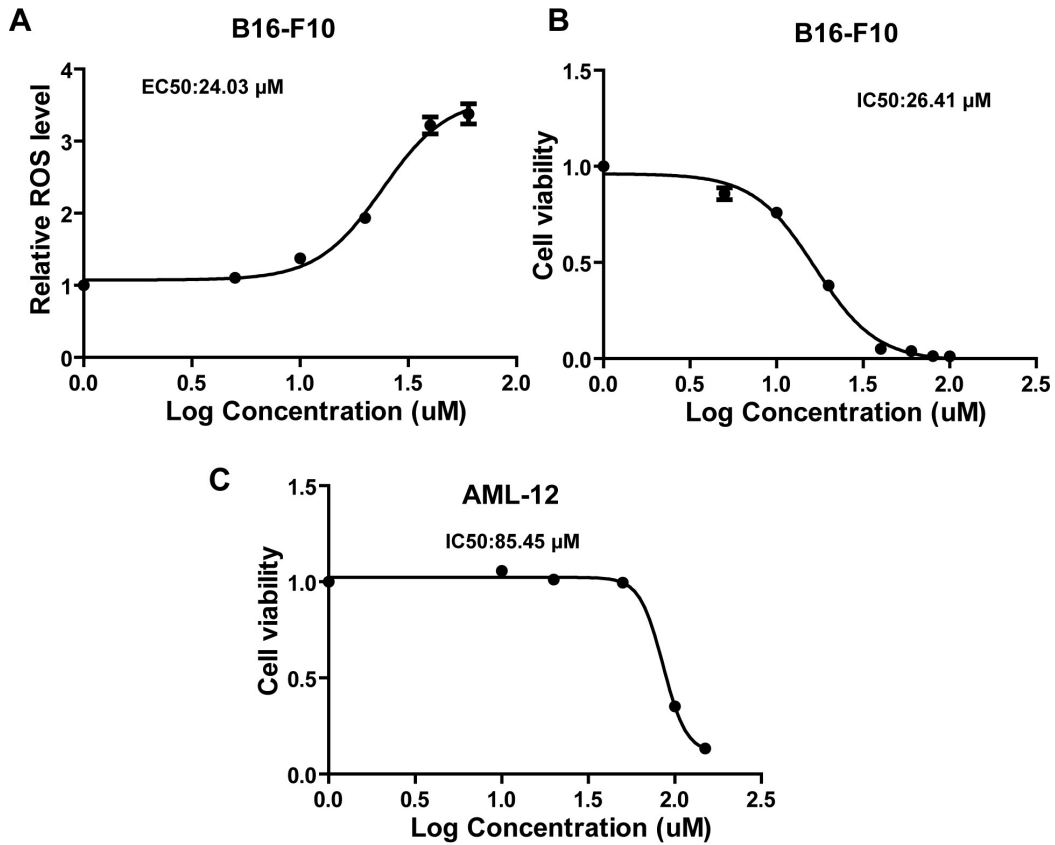

**Figure S174. Dose-response curves of JP8 on ROS induction and cell growth inhibition on B16-F10 and AML-12 cells.** Cells were grown in 12 wells plate and incubated with different concentration of JP8 for 48h. ROS levels were measured and regression curves were fitted (A). Cells were grown in 96 well plates and treated with JP8 at different concentration for 48 h. Cytotoxicity was measured using cell counting kit-8 (CCK-8) and regression curves were fitted (B and C).

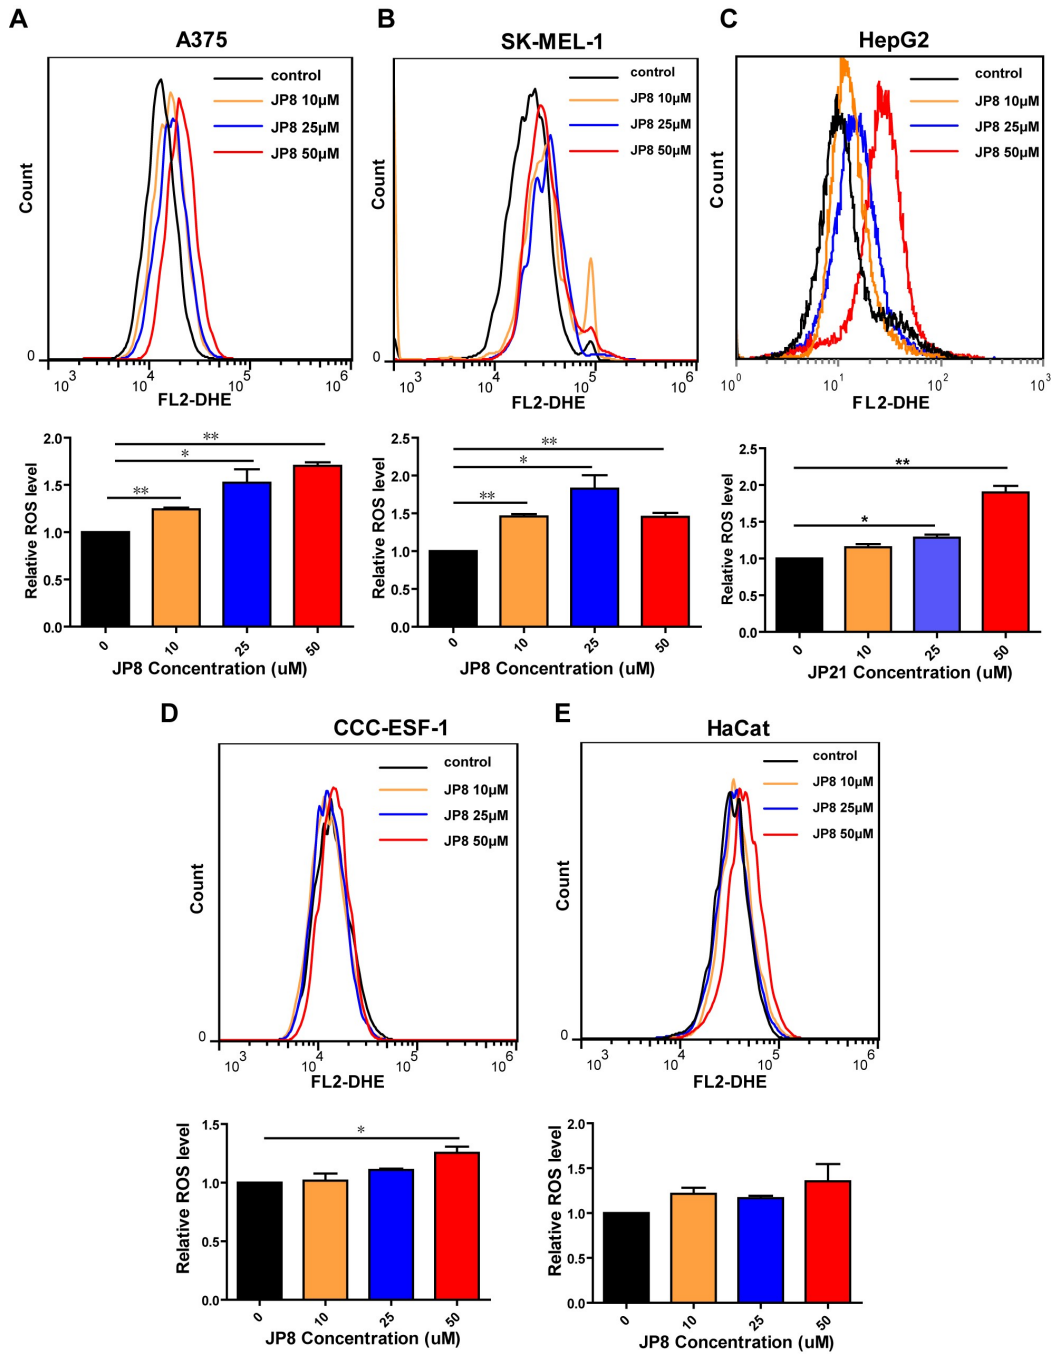

**Figure S175. ROS accumulation levels of JP8 treated cancer and normal cell lines.** Cells were treated with JP8 at indicated concentration for 12h and then stained with DHE. ROS levels were analyzed by flow cytometry.

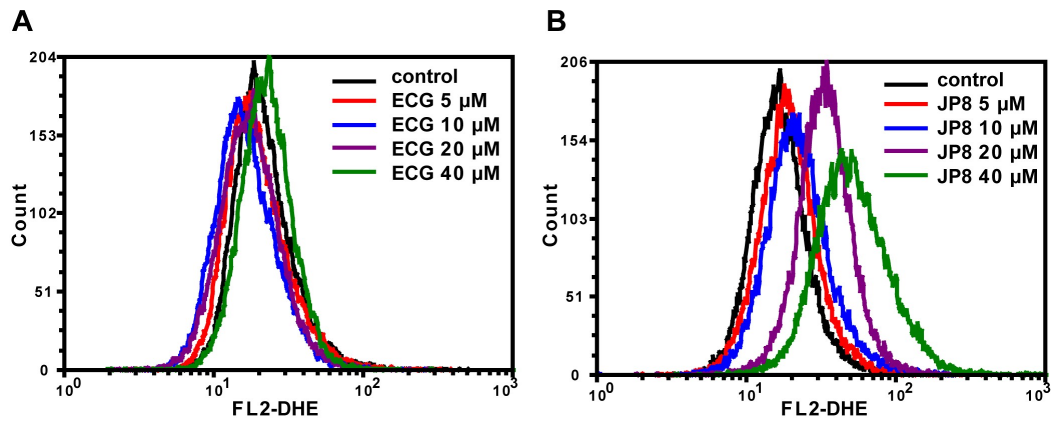

**Figure S176. JP8 but not ECG induces ROS accumulation in a dose dependent manner.** B16-F10 cells were treated with ECG (A) and JP8 (B) at gradient concentrations for 24 h and stained with DHE. ROS levels were analyzed by flow cytometry.



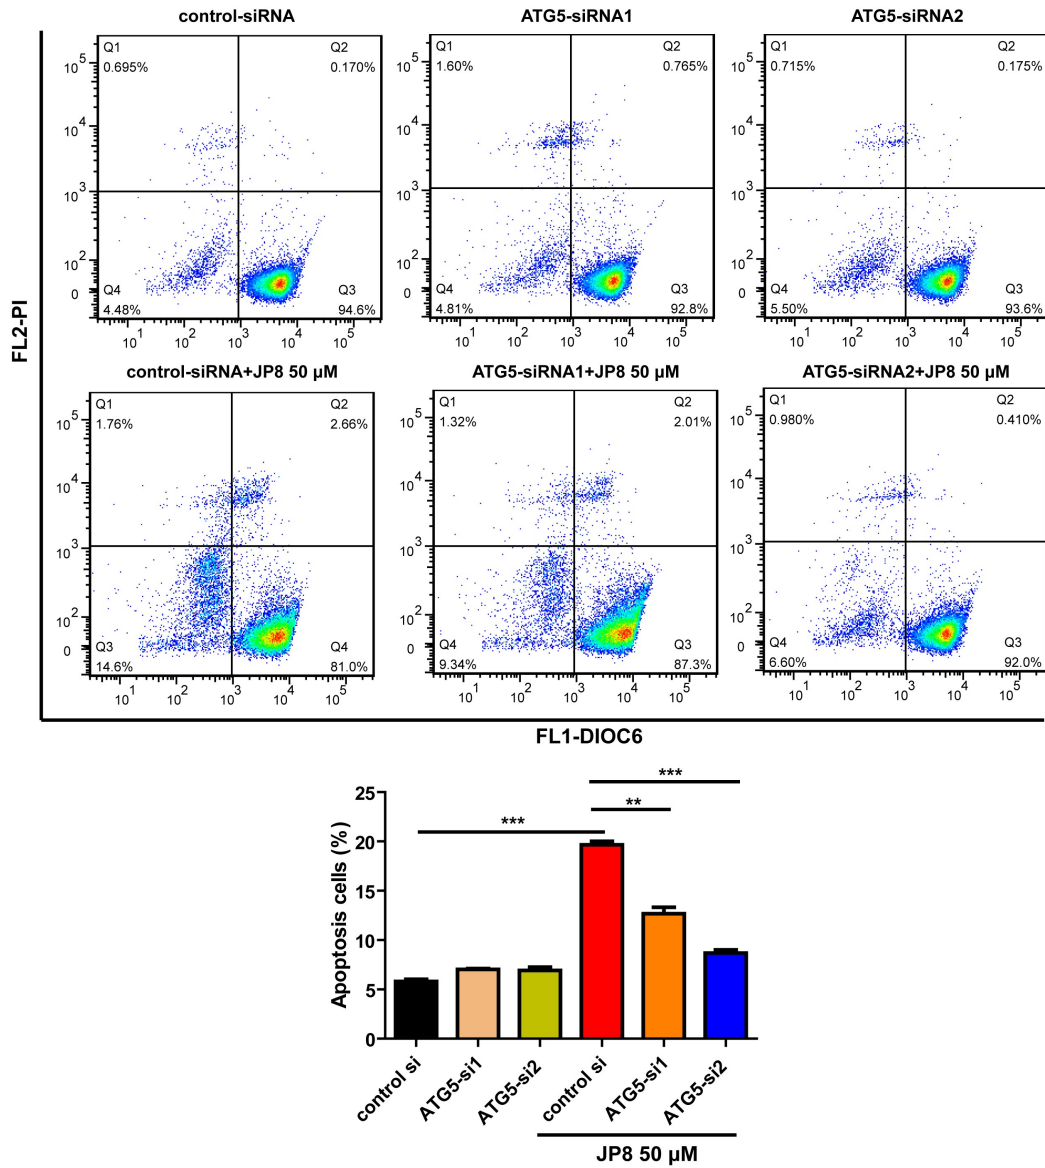

**Figure S177. Silencing of ATG5 attenuates JP8 induced cell death in AML-12 cells.** Control-siRNA or ATG5-siRNA-transfected cells were treated with 50  $\mu$ M JP8 for 24h. Cell apoptosis was measured by DIOC6/PI assays.
